# Supplementary material
Source: PubMed Central journal article supplement (PMC5770558)
Supplement: mmc1.pdf [file mmc1.pdf]

**Biophysical Journal, Volume 113**

**Supplemental Information**

**A Hinged Signal Peptide Hairpin Enables Tat-Dependent Protein  
Translocation**

**Shruthi Hamsanathan, Tamil S. Anthonymuthu, Umesh K. Bageshwar, and Siegfried M.  
Musser**

**Table S1: Primers Used to Generate Mutants**

| <b>Plasmid/Mutant</b> | <b>Forward Primer (5' -&gt; 3')</b>     | <b>Reverse Primer (5' -&gt; 3')</b>     |
|-----------------------|-----------------------------------------|-----------------------------------------|
| pSufI - S2C           | ATA CAT ATG TGT CTC AGT CGG             | ATC TCC TTC TTA AAG TTA AAC AA          |
| pSufI - F8C           | GGC GTC AGT GTA TTC AGG C               | GAC TGA GTG ACA TAT GTA TAT             |
| pSufI - I9C           | CGG CGT CAG TTC TGT CAG GCA TCG GGG     | ACT GAG TGA CAT ATG TAT ATC TCC TTC     |
| pSufI - Q10C          | ATT GCA CTT ATT GCA GGC GCT             | CCC CGA TGC ACA AAT GAA CTG             |
| pSufI - A11C          | GCA CTT ATT GCA GGC GCT GTT             | AAT CCC CGA ACA CTG AAT GAA             |
| pSufI - S12C          | TTC ATT CAG GCA TGT GGG ATT GCA CTT     | CTG ACG CCG ACT GAG TGA CAT ATG TAT     |
| pSufI - G13C          | CAG GCA TCG TGT ATT GCA CTT             | AAT GAA CTG ACG CCG ACT GAG             |
| pSufI - I14C          | TGC AGG CGC TGT TCC CCT G               | ATA AGT GCA CAC CCC GAT G               |
| pSufI - A15C          | TCG GGG ATT TGT CTT ATT GCA             | TGC CTG AAT GAA CTG ACG CCG             |
| pSufI - L16C          | GGG ATT GCA TGT ATT GCA GGC             | CGA TGC CTG AAT GAA CTG ACG             |
| pSufI - A18C          | GCA CTT ATT TGT GGC GCT GTT             | AAT CCC CGA TGC CTG AAT GAA             |
| pSufI - G19C          | CTT ATT GCA TGT GCT GTT CCC             | TGC AAT CCC CGA TGC CTG AAT             |
| pSufI - A20C          | CTT ATT GCA GGC TGT GTT CCC CTG AAG     | TGC AAT CCC CGA TGC CTG AAT GAA CTG     |
| pSufI - V21C          | GCA GGC GCT TGT CCC CTG AAG             | AAT AAG TGC AAT CCC CGA TGC C           |
| pSufI - L23C          | GCT GTT CCC TGT AAG GCG AGC             | GCC TGC AAT AAG TGC AAT CCC C           |
| pSufI - A25C          | CCC CTG AAG TGT AGC GCA GCC             | AAC AGC GCC TGC AAT AAG TGC AA          |
| pSufI - A27C          | CAA CCG CTA CAG CAA CCG CTA CCC GTT     | CTG TTG CCC GGC ACA GCT GGC CTT CAG     |
| pSufI - Q30C          | GCA GCC GGG TGT CAG CAA CCG CTA         | TAG CGG TTG CTG ACA CCC GGC TGC         |
| pSufI - P33C          | GCC GGG CAA CAG CAA TGT CTA CCC GTT CCG | CGG AAC GGG TAG ACA TTG CTG TTG CCC GGC |
| pSufI - V36C          | AGC AAC CGC TAC CCT GTC CGC CGC TGC TTG | CAA GCA GCG GCG GAC AGG GTA GCG GTT GCT |
| pSufI - R44C          | TGC TTG AAT CTC GCT GTG GGC AAC CGC TG  | CAG CGG TTG CCC ACA GCG AGA TTC AAG CA  |
| pSufI - F49C          | GGG CAA CCG CTG TGT ATG ACT GTA CAA CG  | CGT TGT ACA GTC ATA CAC AGC GGT TGC CC  |
| pSufI - M338C         | AGT CTT CCG TGT CGC TTG CTG             | GTC TGT GAC CAG CGG CAG AAG             |
| pSufI - W441C         | GAA GTG CGC ACA GGA AGG CTG             | CCG TTC TAC TTC AAC AGT CAG AC          |
| pSufI - Q31C          | CCC GTT CCG CCG CTG CTT GA              | TAG CGG TTG ACA TTG CCC GGC             |
| pSufI - Y221C         | CAA AGC CCG TGT GTT GAA GTC             | TAC ACC GTT AAC CAG CAG CGT             |
| pSufI - 12C/25C       | CCC CTG AAG TGT AGC GCA GCC             | AAC AGC GCC TGC AAT AAG TGC AA          |
| pTatAC                | ATG TCT GTA GAA GAT ACT                 | GTT TAC ACC TGC TCT TTA                 |
| pTatBC                | ATG TTT GAT ATC GGT TTT                 | TAT ACG TTA CAC GGC CAT                 |
| pTatC                 | ATG TCT GTA GAA GAT ACT                 | TAT ACG TTA CAC GGC CAT                 |
| pSufI KK              | ACT CAG TAA GAA ACA GTT CAT TC          | GAC ATA TGT ATA TCT CCT TCT TA          |

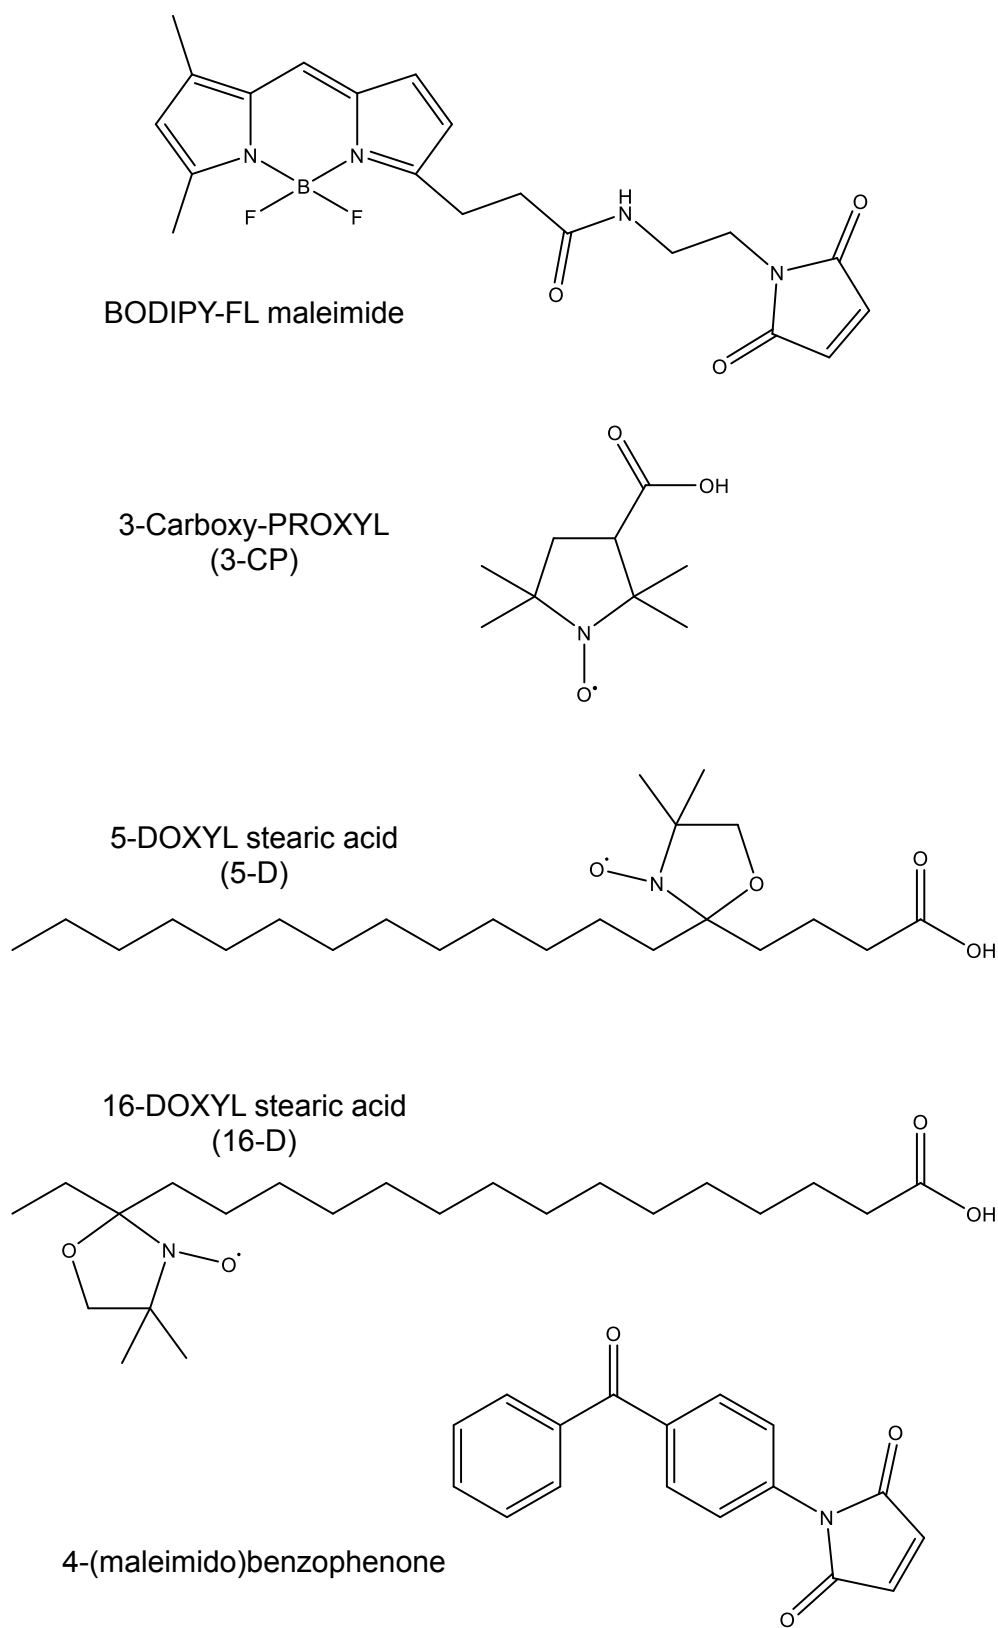

**Figure S1. Structures of the BODIPY-FL Cysteine-reactive Fluorescent Probe, the Nitroxide Quenchers, and the Photocrosslinker used in this Study.**

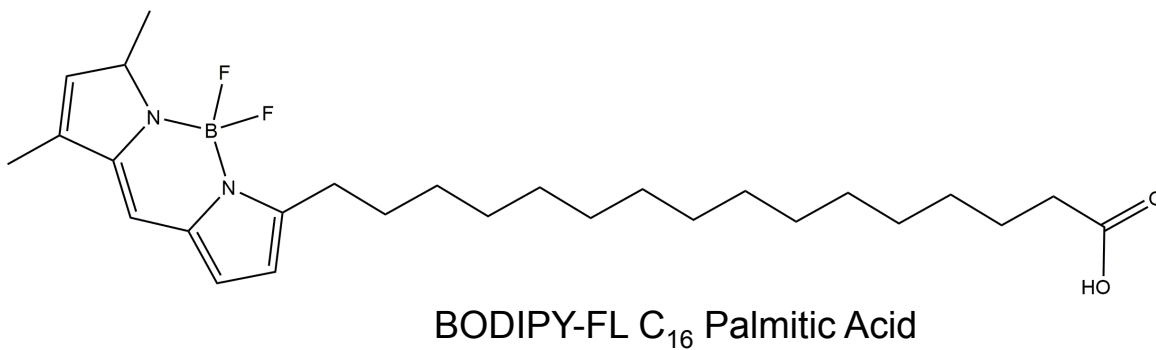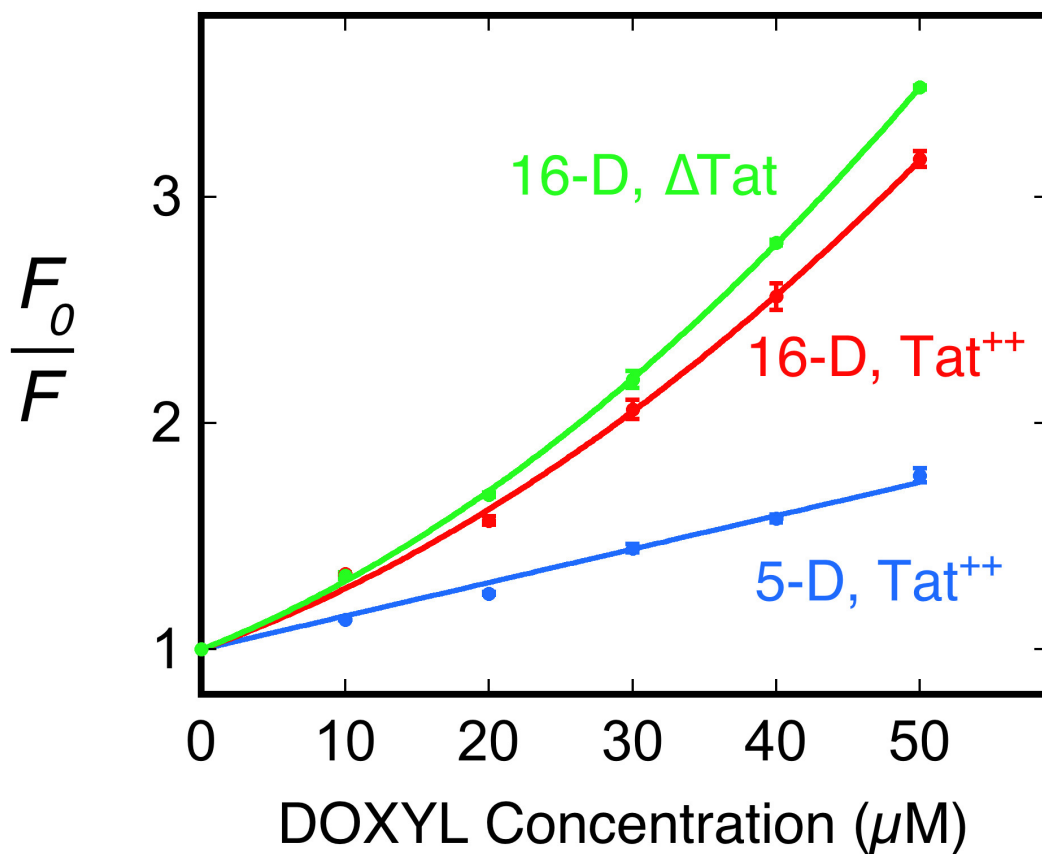

**Figure S2. Stern-Volmer Quenching of BODIPY-FL at the C<sub>16</sub> Position of Palmitic Acid Incorporated into ΔTat and Tat<sup>++</sup> IMVs.** Quenching was performed as in Figure 2. The data were fit to a first (5-D) or second (16-D) degree polynomial.

A

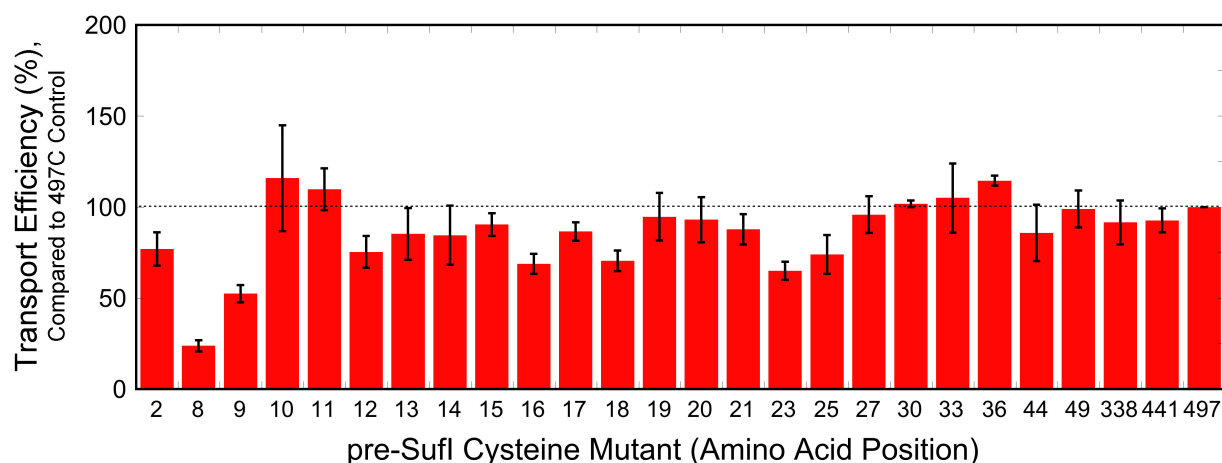

B

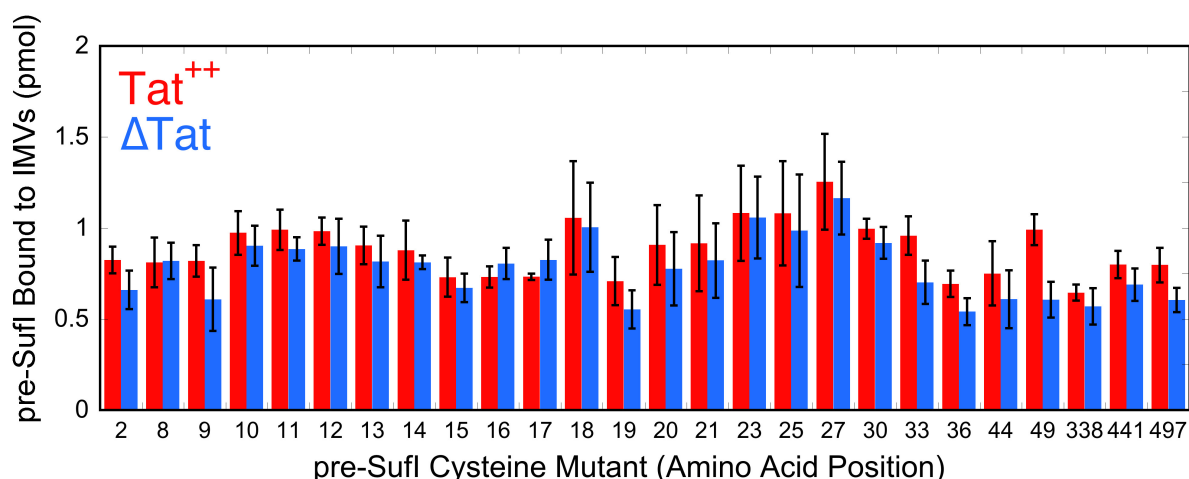

### Figure S3. Transport Efficiencies and Membrane Binding of pre-SufI Mutants

**(A) *In vitro* Tat Transport Efficiencies for BODIPY-labeled Single Cysteine pre-SufI Mutants.** Transport assays were performed by incubating BODIPY-labeled pre-SufI (90 nM) with  $Tat^{++}$  inverted membrane vesicles (from *E. coli* strain MC4100 overproducing TatABC;  $A_{280} = 5$ ). A pmf was generated by addition of NADH (4 mM), and samples were incubated at 37°C for 30 minutes. Untransported protein was digested with proteinase K (0.73 mg/mL for 40 min). Samples were then analyzed by SDS-PAGE, and immunoblotted with SufI antibodies. Most mutants yielded transport efficiencies of ~80-120%, indicating little effect of the mutation and/or dye label. Notable exceptions are the F8C and I9C mutants, which had transport efficiencies of ~20% and ~50%, respectively, likely because of these residues' proximity to the RR-motif.

**(B) Membrane Binding of pre-SufI Single Cysteine Mutants.** Membrane binding was performed by incubating BODIPY-labeled pre-SufI mutants (90 nM; 3.2 pmol) with  $\Delta Tat$  or  $Tat^{++}$  IMVs ( $A_{280} = 2$ ) at 37°C for 10 min. IMVs were sedimented (16,200 x *g* for 30 min), and analyzed by SDS-PAGE and immunoblotting with anti-SufI antibodies using

pre-Sufl concentration standards ( $N = 3$ ). These data indicate that the labeled pre-Sufl mutants bind to Tat-deficient and Tat-containing membranes. However, differences in membrane surface composition and properties can lead to different quantities of lipid-bound precursor under the two conditions. Tat-deficient cells are phenotypically different (chainy phenotype) (1) due to cell division defects, suggesting that differences in IMV properties can be expected. More importantly, the IMV concentration assay is based on an absorbance reading (at 280 nm in 2% SDS), which is highly dependent on the total protein concentration and purity of the IMV preparation. Thus, calculation of the translocon-bound fraction from these data is considered unreliable. The  $\alpha$  values determined by our fluorescence approach (Figure S3) are not influenced by these issues.

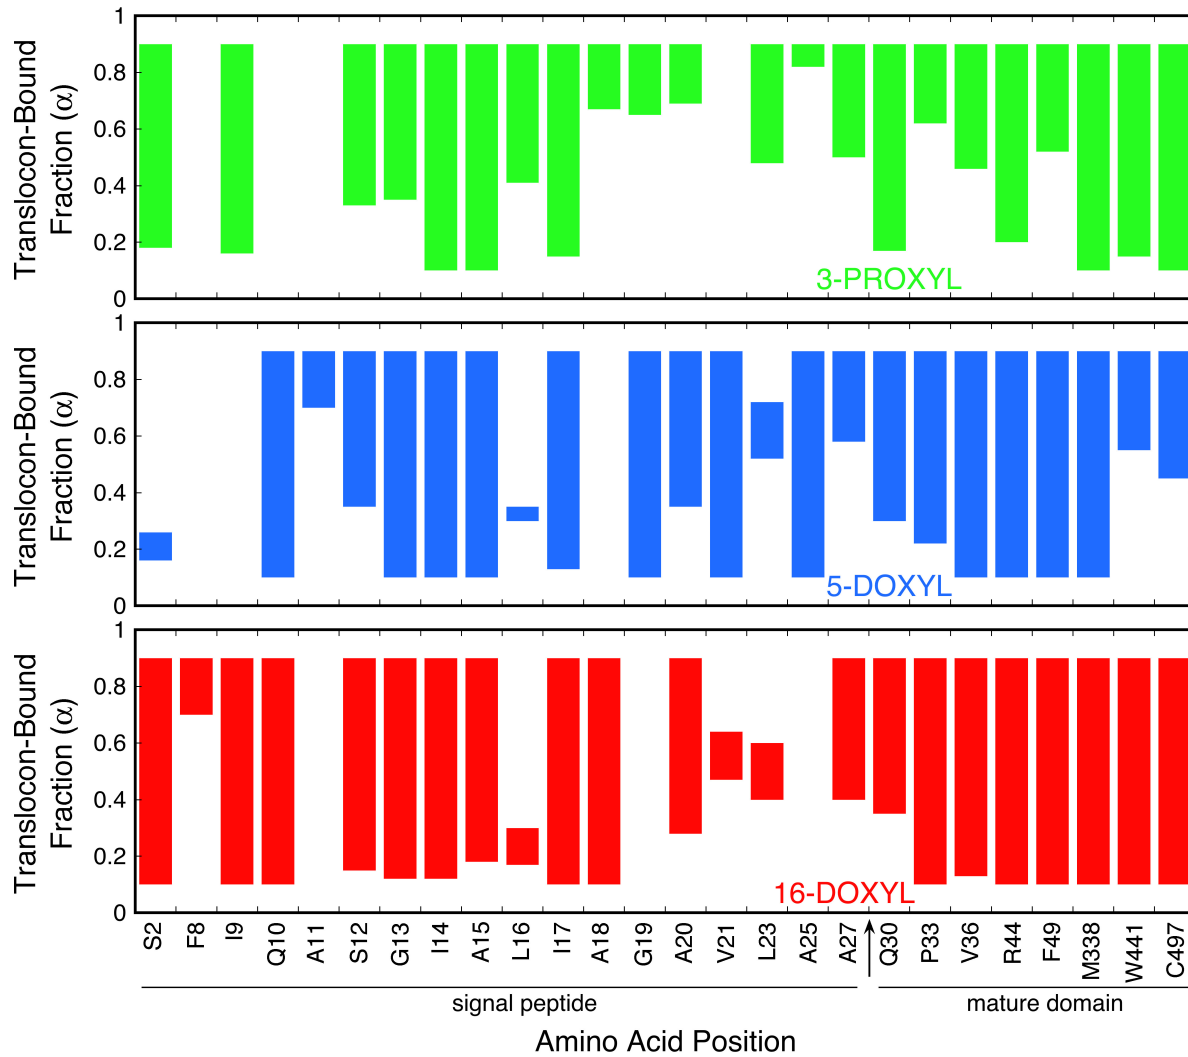

**Figure S4. Uncertainty in the  $\alpha$  Values for Lipid- and Translocon-Bound pre-SufI.** Bars indicate the largest and smallest  $\alpha$  values consistent with the fluorescence quenching data (Figures 2 & 3). The translocon-bound fraction ( $\alpha$ ) was frequently poorly constrained by the data (wide ranges), often because the quenching observed under  $\Delta$ Tat and Tat<sup>++</sup> conditions was very similar. Comparison of more constrained  $\alpha$  values (narrow ranges) reveals that  $\alpha$  covered virtually the entire range from 0.1-0.9, suggesting that the various labeled mutants indeed had different lipid and translocon binding affinities. For conditions yielding unreliable  $K_D$  values (see Figure 3),  $\alpha$  was not determined (blank).

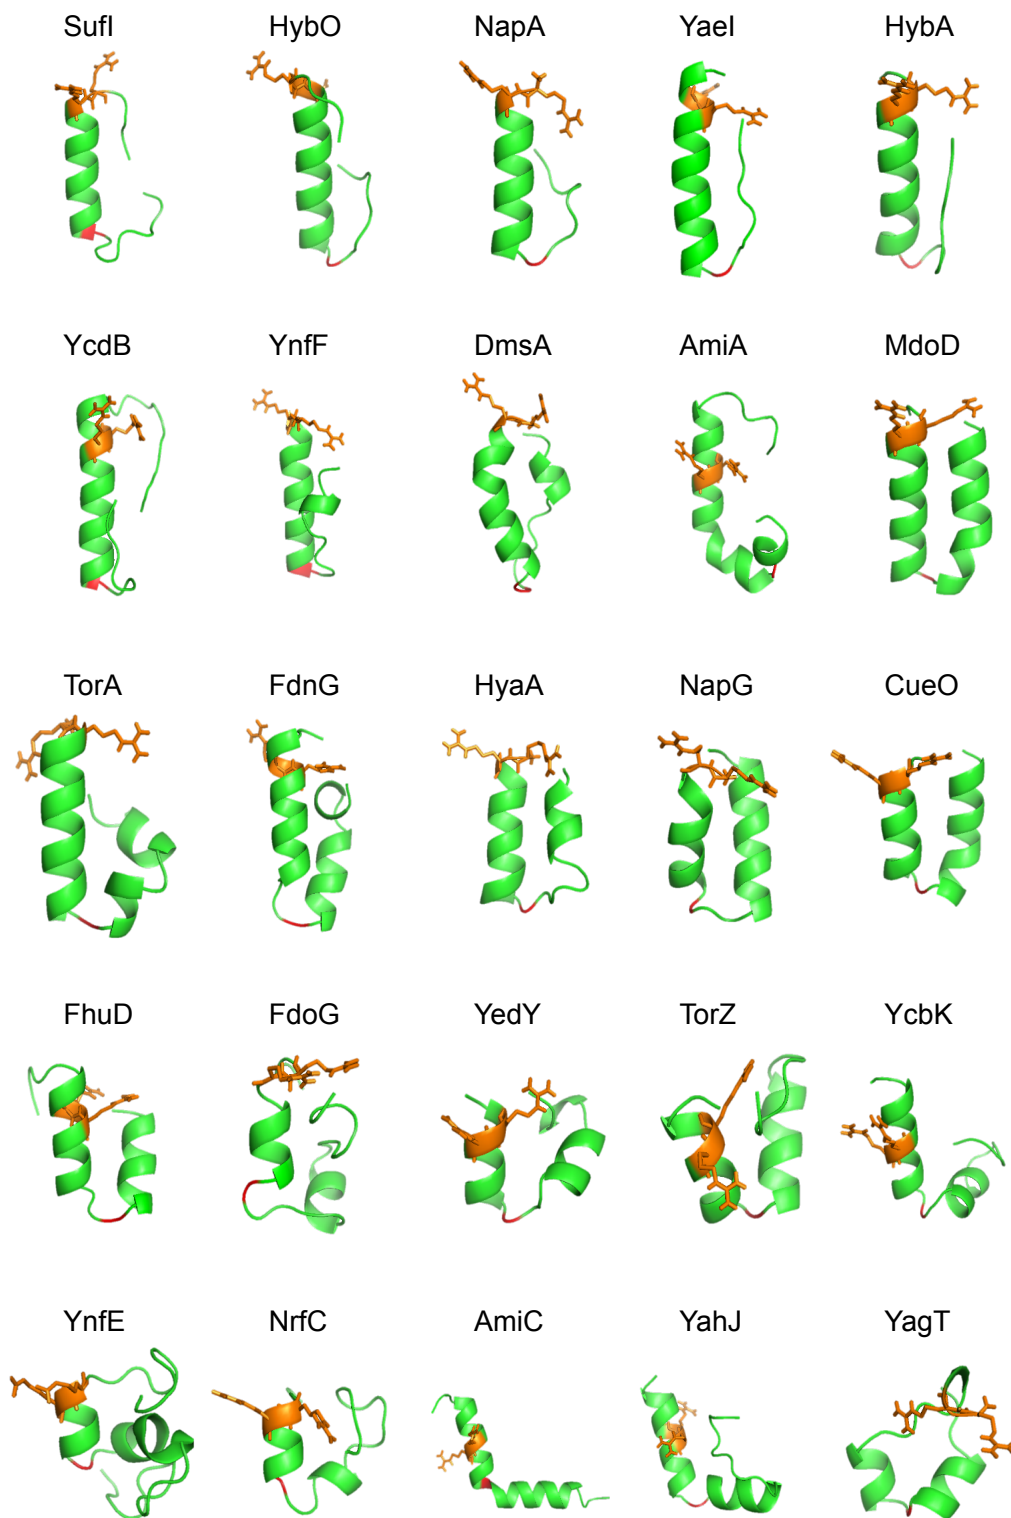

**Figure S5. Predicted Secondary Structures of the Signal Peptides from 25 *E. coli* Tat Substrates.** Secondary structures were generated as for pre-SufI in Figure 6A. The RR-motif is *orange*. The residue at the end of the first helical region (*red*) is typically glycine (see (B)). The predicted structure for NapA shown here is consistent with its NMR solution structure (PDB ID: 2PQ4).



SufI MSLSRRQFIQASGIALCAGAVPLKASA  
 HybO MTGDNTLIHSHGINRRDFMKLCAALATMGLSSKAAA  
 NapA MKLSRRSEFMKANAVAAAAAAGLSVPGVA  
 YaeI MISRRRFLQATAATIATSSGFGYMHYC  
 HybA MNRRNFKAASCCALLTCALPSVSHA  
 YcdB MQYKDENGVNEPSRRLLKVICALALAGSCPVAHA  
 YnfF MMKIHTTEALMKAEISRRSLMKTSALGSLALASSAFTLPPFSQMVRA  
 DmsA MKTKIPDAVLAAEVSRRGLVKTTAIGGLAMASSALTLPFSRIAHA  
 AmiA MSTFKPLKTLTSRRQVLKAGLAALTLSGMSQAIA  
 MdoD MDRRRFIKGSMAAAVCGTSGIASLFSQAFA  
 TorA MNNNDLFQASRRFLAQLGGLTVAGMIGPSLLTPRRATAAQA  
 FdnG MDVSRROFFKICAGCMAGTTVAALGFAPKQALA  
 HyaA MNNEETFYQAMRRQGVTRRSFLKYCSLAATSIGLCAGMAPKIAWA  
 NapG MSRSAKPQNGRRRFLRDVVRTAGSLAAVGVALLGLOQQTARA  
 CueO MQRRDFLKYSVAIGVASALPLWSRAVFA  
 FhuD MSGLPLISRRLLTAMALSPLLWQMNTAHA  
 FdoG MQVSRROFFKICAGCMAGTTAAALGFAPSVALA  
 YedY MKRRQVLKALGISATALSPLHAHA  
 TorZ MTLTRREFIKHSGIAACALVVTSAAPLPAWA  
 YcbK MDKFDANRRKLLAIGSVALGAAILPTPAFA  
 YnfE MSKNERMVGISRRTLVKSTAI GSLALAAGGFSLPFTLRNAAA  
 NrfC MTWSRRQFLTGVGVLAAVSCTAGRVA  
 AmiC MSGSNTAISRRLLQGACAMWLLSVSQVSLA  
 YahJ MKESNSRREFLSQSGKMTAAALFGTSVPLAHA  
 YagT MSNQGEYPEDNRVKGHEPHDLSLTRRDLIKVSAATAVYPHSTLAASVPA

12-17

**Figure S6. Signal Peptide Sequences for 25 *E. coli* Tat Substrates.** The helix-breaking residues glycine (*green*) and proline (*red*) are identified. The residue(s) after the RR-containing helix as predicted in Figure S5 is circled in *red*, and is (are) typically glycine (20/25, 80%), or occasionally two non-aromatic hydroxyl (S or T) residues (3/25, 12%), which are weak helix-breaking residues (2). The helix destabilizing residue(s) is(are) frequently 12-17 residues after the RR-motif (*blue*), consistent with Figure 6C.

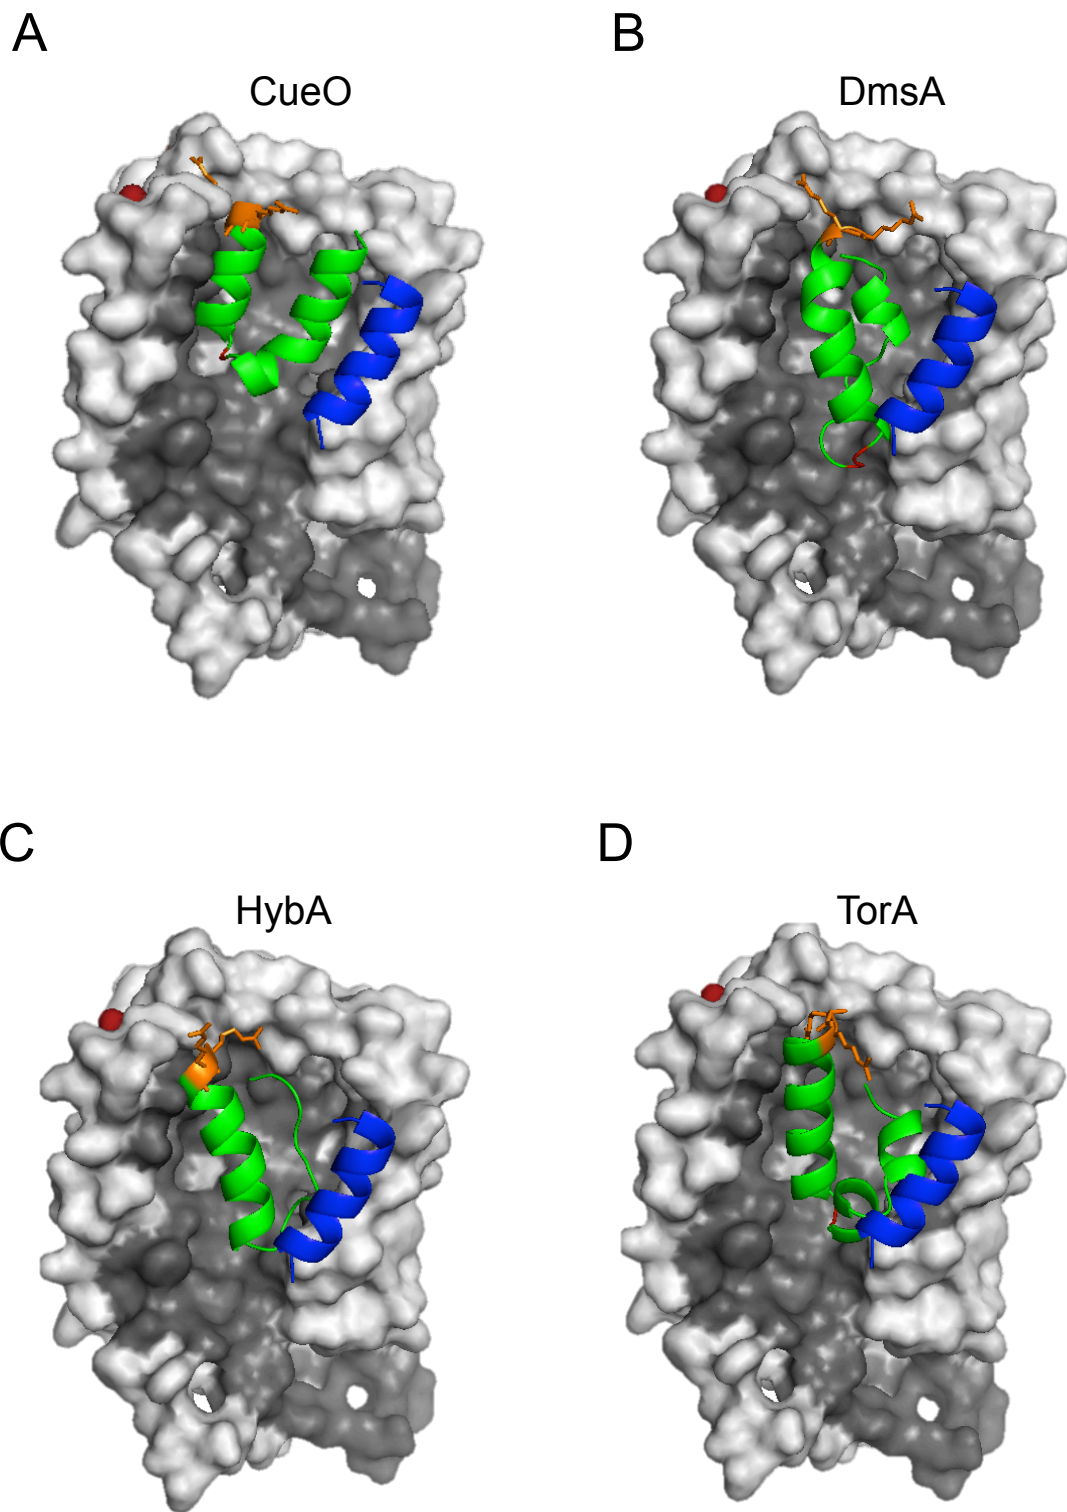

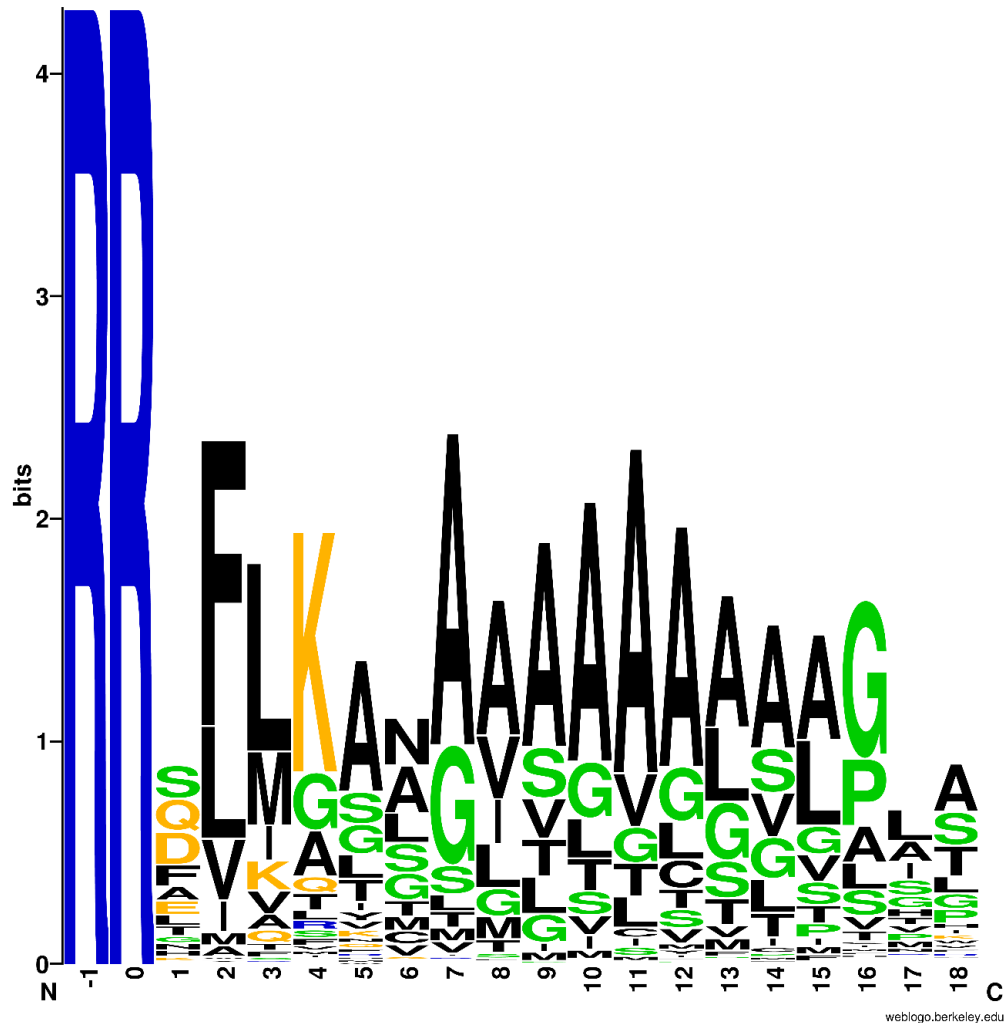

**Figure S8. Sequence Logo for the 512 Tat Signal Sequences of Figure 6C.** The RRXFLK Tat consensus motif (3, 4) is apparent (-1 to 4), as is the presence of the helix destabilizing residue glycine, which is most predominant 16 residues after the RR-motif. The sequence logo was constructed using web logo tool version 2.8.2 (<http://weblogo.berkeley.edu/logo.cgi>).

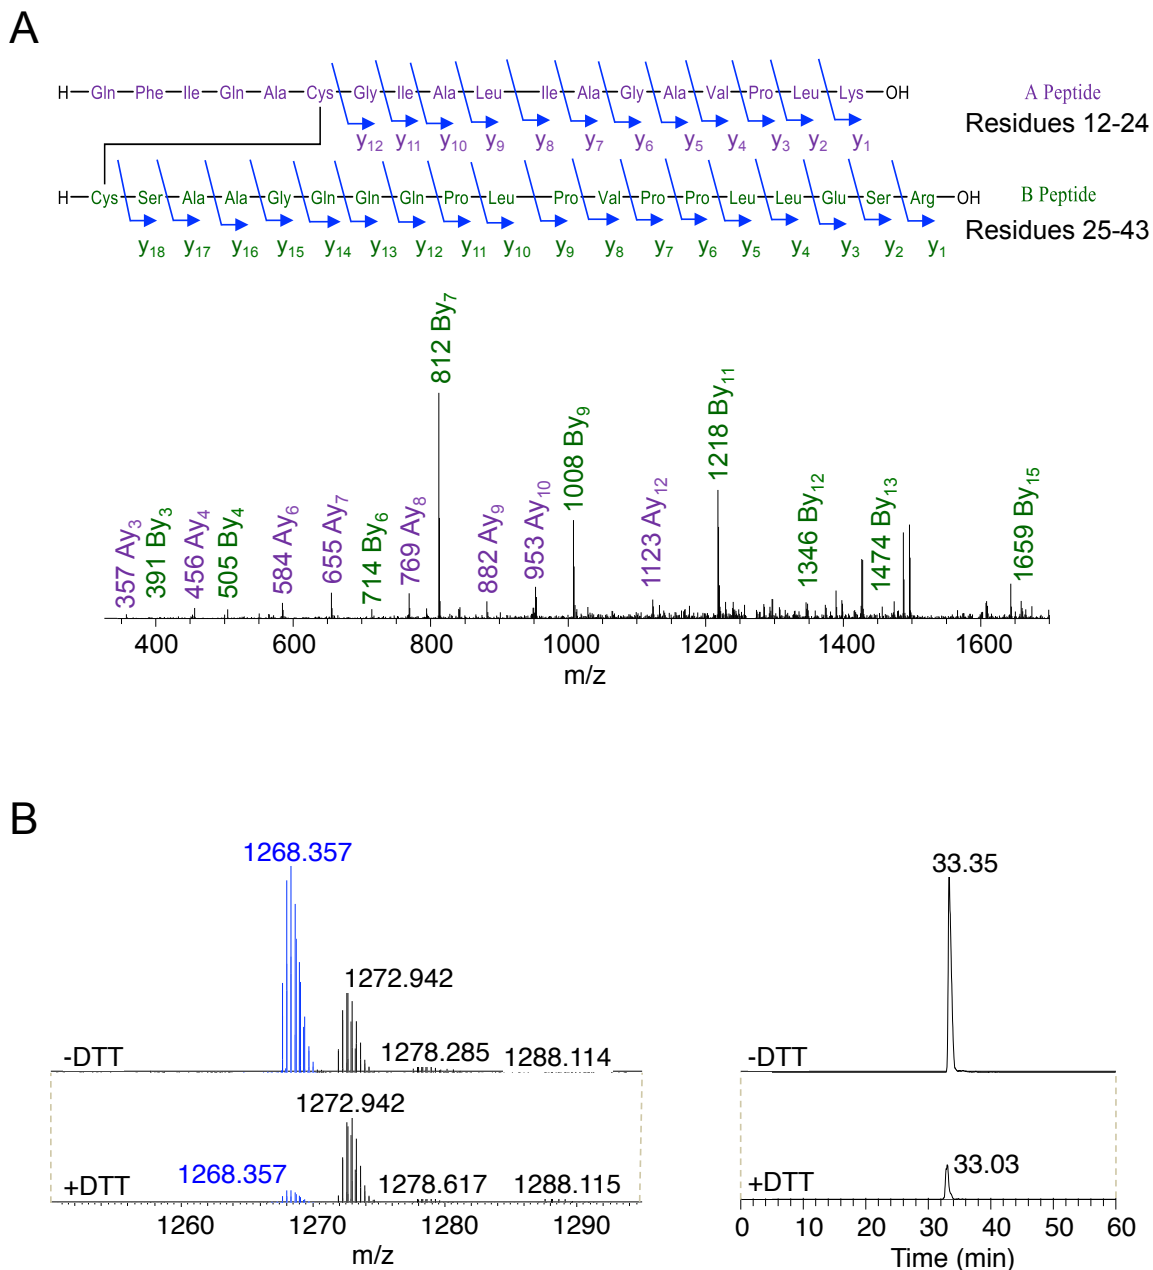

**Figure S9. Disulfide Crosslinked pre-Sufl(S12C/A25C).**

**(A) Tandem Mass Spectrometry Analysis of the Disulfide Linked Peptide Fragment of pre-Sufl(S12C/A25C).** The CID fragmentation spectrum (consisting mainly of +1H adducts) for the peptide ion of  $m/z = 1268.357$  (see Figure 8D). The peak pattern is consistent with a fusion between pre-Sufl signal peptide residues 12-24 and 25-43.

**(B) Enrichment of the Disulfide-linked Form of pre-Sufl(S12C/A25C).** The disulfide-linked form of pre-Sufl (S12C/A25C) was enriched to ~60% using thiol-reactive SulfoLink Coupling resin (see Materials and Methods). Enrichment was quantified by comparing the ion intensities for peptide B (residues 25-43 of pre-Sufl; see (A)) in the presence and absence of DTT, using a closely eluting peak for normalization. The disulfide enriched preparation yielded a substantial increase in the  $m/z = 1268.357$  peak (compare with Figures 8D and 8E).

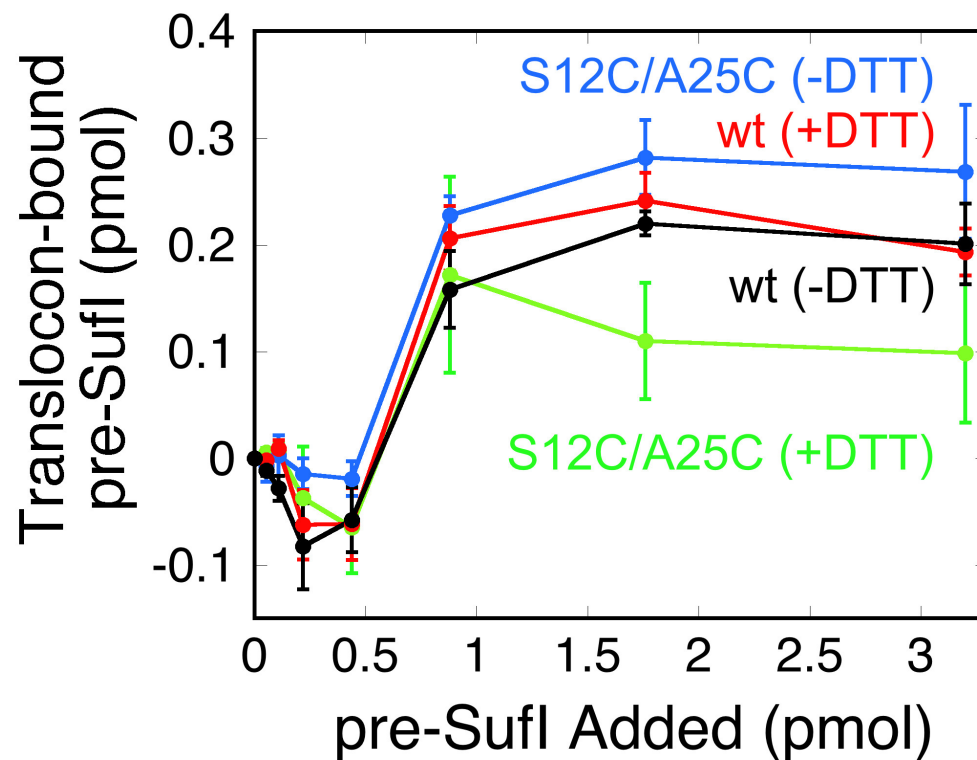

**Figure S10. Translocon-bound pre-Sufl(S12C/A25C).** As described previously (5), the translocon-bound precursor protein is dissociated upon incubation with 2 M urea. Thus, the translocon-bound precursor protein was quantified by subtracting the amount of membrane-bound pre-Sufl in 2 M urea (lipid-bound precursor; not shown) from the total membrane-bound pre-Sufl (lipid- & translocon-bound precursor; Figure 8G).

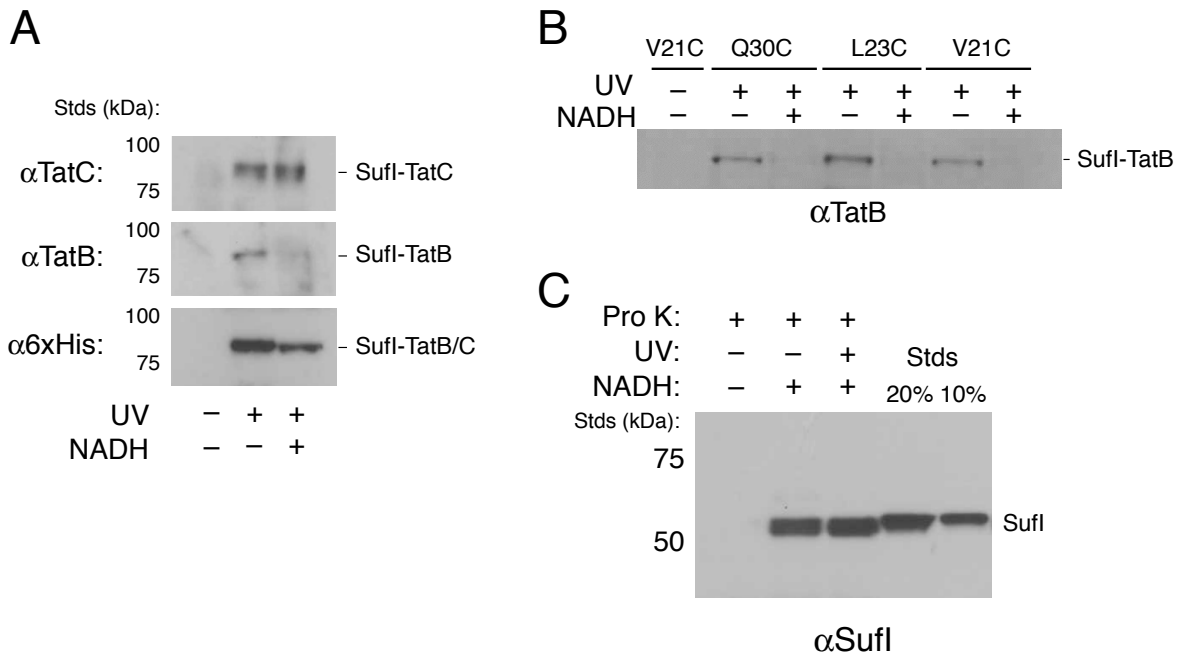

**Figure S11. Transportability of Crosslinked Precursor Proteins.** (A) Translocation of pre-Sufl(V21C) was blocked when crosslinked to TatC. After pre-Sufl(V21C) was photocrosslinked to TatC or TatB (as in Figure 7A), the IMV membranes were energized (4 mM NADH for 30 minutes at 37°C). IMVs were recovered by centrifugation (16,200 x g, 30 min), and samples were resolved via SDS-PAGE and analyzed via immunoblotting, as indicated. The pre-Sufl/TatC adduct remained after membrane energization by NADH, indicating that transport of pre-Sufl crosslinked to TatC does not occur (*top*; N = 3). In contrast, the amount of pre-Sufl/TatB adduct was substantially reduced after membrane energization by NADH, suggesting transport of Sufl (*middle*; N = 3). The anti-6xHis immunoblot, which detects Sufl-6xHis, indicates that the Sufl crosslinked to TatB and TatC was reduced by almost half (59±3% remaining) after membrane energization with NADH (*bottom*; N = 6). The pre-Sufl/TatC and pre-Sufl/TatB adducts migrate similarly and hence the bands overlap. The reduction in intensity of the Sufl-TatB/C band in the presence of NADH likely results from transport of the pre-Sufl/TatB adduct. (B) Translocation of additional pre-Sufl mutants crosslinked to TatB. The experiment in (A) was repeated with the V21C, L23C and Q30C mutants of pre-Sufl. The amount of crosslinked pre-Sufl/TatB adduct was substantially reduced in the presence of NADH, indicating proteolysis, probably by digestion of the adduct after translocation. (C) Transport was not affected by UV illumination. The Tat transport assay was described in Figure 2 – in short, the Sufl band observed in the presence of NADH (4 mM) and proteinase K (Pro K, 0.73 mg/mL) represents the transported protein. The pre-Sufl concentration standards (Stds) are a loading control in terms of percent precursor added to the reaction mixture, and indicate that ~20% of the initial precursor protein was transported.

The hairpin-hinge hypothesis (Figure 8) predicts that mature domain translocation should not occur when the C-terminal part of the signal peptide is crosslinked to the Tat translocon. The experiments in this figure tested whether signal peptide mutants crosslinked to TatB or TatC could be translocated. We assumed that transport of

crosslinked precursor protein would result in cleavage by signal peptidase, which would be observed as the disappearance of the high molecular weight crosslinked band when membranes were energized with NADH, i.e., the signal peptide would remain crosslinked to TatB or TatC (and indistinguishable from TatB or TatC alone) and the mature domain would be released. Surprisingly, the results conflicted for the V21C mutant, which crosslinks to both TatC and TatB (Figure 7A). The pre-Sufl/TatC crosslinked band was retained under transport conditions (A), indicating no transport, and consistent with the hypothesis that signal peptide residues after the hinge residue (G19) must move during transport. In contrast, the pre-Sufl/TatB crosslinked band was substantially diminished (A). This latter result was also observed when the pre-Sufl mutants L23C and Q30C were crosslinked to TatB (B). All of these results were observed consistently and repeatedly ( $N \geq 3$ ). The Q30C result is especially surprising since this mutation is after the signal peptide cleavage site (between residues 27 and 28) – signal peptidase catalyzed cleavage was expected to only remove the signal peptide from the crosslinked adduct, which would have produced only a minor gel shift (this was not observed). While puzzling, a possible scenario is that TatB is transported with the mature domain, and protease digestion can occur at multiple sites after translocation, resulting in disappearance of the crosslinked adduct. This interpretation is consistent with the Sufl immunoblot of the crosslinked protein – under transport conditions, this band get weaker, but does not disappear (A), which is the expected result if the precursor crosslinked to TatB was transported and digested, and that crosslinked to TatC was not. This picture is consistent with the recent hypothesis that TatB is replaced by TatA during transport (6) – more precisely, if the interaction of TatB with the rest of the translocation machinery is broken (required for TatB to be replaced by TatA), the TatB molecule crosslinked to the precursor protein can be transported across the membrane with the mature domain. We do NOT expect that TatB translocation is a normal step in the transport cycle.

## SUPPORTING REFERENCES

1. Stanley, N. R., K. Findlay, B. C. Berks, and T. Palmer. 2001. *Escherichia coli* strains blocked in Tat-dependent protein export exhibit pleiotropic defects in the cell envelope. *J Bacteriol* 183:139-144.
2. Urban, S., and M. Freeman. 2003. Substrate specificity of rhomboid intramembrane proteases is governed by helix-breaking residues in the substrate transmembrane domain. *Mol Cell* 11:1425-1434.
3. Berks, B. C. 1996. A common export pathway for proteins binding complex redox cofactors? *Mol Microbiol* 22:393-404.
4. Sargent, F., E. G. Bogsch, N. R. Stanley, M. Wexler, C. Robinson, B. C. Berks, and T. Palmer. 1998. Overlapping functions of components of a bacterial Sec-independent protein export pathway. *EMBO J.* 17:3640-3650.
5. Bageshwar, U. K., and S. M. Musser. 2007. Two electrical potential-dependent steps are required for transport by the *Escherichia coli* Tat machinery. *J Cell Biol* 179:87-99.
6. Alcock, F., P. J. Stansfeld, H. Basit, J. Habersetzer, M. A. Baker, T. Palmer, M. I. Wallace, and B. C. Berks. 2016. Assembling the Tat protein translocase. *Elife* 5:e20718.
