# Supplementary material
Source: PubMed Central journal article supplement (PMC5770558)
Supplement: mmc2.pdf [file mmc2.pdf]

# A Hinged Signal Peptide Hairpin Enables Tat-Dependent Protein Translocation

Shruthi Hamsanathan,<sup>1</sup> Tamil S. Anthonymuthu,<sup>2</sup> Umesh K. Bageshwar,<sup>1</sup> and Siegfried M. Musser<sup>1,\*</sup>

<sup>1</sup>Department of Molecular and Cellular Medicine, College of Medicine, The Texas A&M Health Science Center, Texas A&M University, College Station, Texas and <sup>2</sup>Department of Critical Care Medicine, School of Medicine, University of Pittsburgh, Pittsburgh, Pennsylvania

**ABSTRACT** The Tat machinery catalyzes the transport of folded proteins across the bacterial cytoplasmic membrane and the thylakoid membrane in plants. Using fluorescence quenching and cross-linking approaches, we demonstrate that the *Escherichia coli* TatBC complex catalyzes insertion of a pre-Sufl signal peptide hairpin that penetrates about halfway across the membrane bilayer. Analysis of 512 bacterial Tat signal peptides using secondary structure prediction and docking algorithms suggest that this hairpin interaction mode is generally conserved. An internal cross-link in the signal peptide that blocks transport but does not affect binding indicates that a signal peptide conformational change is required during translocation. These results suggest, to our knowledge, a novel hairpin-hinge model in which the signal peptide hairpin unhinges during movement of the mature domain across the membrane. Thus, in addition to enabling the necessary recognition, the interaction of Tat signal peptides with the receptor complex plays a critical role in the transport process itself.

## INTRODUCTION

Bacteria and archaea utilize two general export systems to translocate proteins across the cytoplasmic membrane to the periplasm. The Sec machinery threads unfolded polypeptides through a gated, permanent pore utilizing ATP and the proton-motive force (pmf). The Tat machinery transports folded proteins, requires at least one component of the pmf, and assembles upon demand (1–6). “Tat” (twin arginine translocation) signal peptides are characterized by a RRXFLK consensus motif, which includes the twin-arginine namesake (RR-motif) (7,8). A structurally and functionally conserved Tat system is found in plant thylakoids (2,9). Tat substrates perform key roles in many cellular processes, including respiration, photosynthetic energy metabolism, nitrogen fixation, cell division, cell motility, and virulence (10).

In *Escherichia coli*, Tat-dependent transport minimally requires TatA, TatB, and TatC (8). TatA and TatB both have an N-terminal membrane domain, followed by an amphipathic helix, and a highly charged, intrinsically disordered C-terminal tail (4). TatC, the largest and most conserved of the three Tat components, has six transmembrane helices spanning the inner membrane (11,12). TatB

and TatC form a receptor complex (13–15) in which TatC provides numerous critical interactions with Tat signal peptides (16,17). TatB modulates the signal peptide’s interaction with TatC and is in close proximity to both the bound signal peptide and the mature domain (18,19). X-ray structures of TatC from *Aquifex aeolicus* reveal a glovelike shape (11,12). Although the signal peptide binding site and mode of interaction has not been definitively established, two glutamic acid residues on the TatC cytoplasmic face are essential for a high affinity signal peptide interaction (12) and likely interact with the RR-motif. A deep groove in the side of TatC (the “palm” of the “glove”) exposed to the bilayer interior seems ideally suited to accommodate the signal peptide in a membrane inserted configuration (11).

Signal peptide binding is clearly an important trigger for initiating the Tat transport process, and therefore, a significant effort has sought to establish the identity and nature of this interaction. Numerous studies have verified the stability and 1:1 stoichiometry of the TatBC heterodimer (20–23). However, the oligomerization state of TatBC heterodimers remains controversial. Models have been proposed in which the substrate binds to a central cavity formed by a dimer, trimer, or a tetramer (24–26). Single particle electron microscopy suggests that the substrate interacts with the outside of a substantially larger TatBC complex (27), consistent with biochemical studies that support an

Submitted June 16, 2017, and accepted for publication September 29, 2017.

\*Correspondence: [smusser@tamhsc.edu](mailto:smusser@tamhsc.edu)

Editor: Joseph Falke.

<https://doi.org/10.1016/j.bpj.2017.09.036>

© 2017 Biophysical Society.

octomeric TatBC complex (13,14,20,28). Because the TatBC interaction with Tat signal peptides is pmf-independent and of relatively high affinity ( $K_D \approx 10\text{--}20$  nM) (29), the properties of the receptor-substrate complex can be readily probed. Cross-linking studies have identified residues of TatB and TatC in proximity to signal peptides (16–18,24,30,31). However, the structural features of the signal peptide binding site and the conformation of the bound signal peptide in regard to the membrane bilayer remains uncertain.

The Tat machinery performs the challenging task of transporting globular proteins of variable diameters (up to  $\sim 6$  nm) through a membrane bilayer without collapsing essential ion gradients (32,33). The composition of the transient translocation pore has remained elusive. Electron microscopy revealed that homo-oligomers of TatA form ring-shaped structures with a pore size of 3–7 nm, consistent with the expected dimensions of a variable diameter Tat translocation channel (32). TatA molecules oligomerize in the presence of transport substrate and the pmf in  $\sim 20\text{--}40$  s (15,29), suggesting that Tat translocation pores assemble de novo in response to the formation of cargo-receptor complexes. In some models, the translocation pore is not formed entirely from TatA, but also includes TatB and TatC (24–26).

Exactly when and how the signal peptide penetrates the membrane bilayer is a matter of considerable debate. Tat signal peptides bind to membranes devoid of Tat proteins (34–37), suggesting that Tat precursors initially bind to the membrane lipids and then diffuse to the TatBC complex. Based on protease protection, it was concluded that membrane-bound signal peptides spontaneously insert into the membrane (38–40). In contrast, premature signal peptide cleavage in membranes with TatC alone suggested that TatC is a signal peptide insertase (18), thus arguing against spontaneous signal peptide insertion into the membrane bilayer. Most models postulate that the signal peptide binds to the interior of an oligomeric TatBC receptor complex (11,16,24–26,41,42).

The goal of the work reported here was to clarify how Tat signal peptides interact with the membrane lipids and with the TatBC complex. Specifically, we sought to determine the penetration depth of the signal peptide, its environment, and how these might influence subsequent steps of the transport process. Using nitroxide fluorescence quenching and cross-linking approaches, we establish that the TatBC complex inserts the pre-SufI signal peptide into the membrane in a hairpin configuration that extends about halfway across the bilayer. Cross-linking studies indicate that the C-terminal half of this hairpin contacts TatB. Docking simulations of Tat signal peptides with the TatC structure plus the TatB membrane domain support the hypothesis that the large groove on the side of TatC accommodates the signal peptide hairpin. These results, among others, motivated, to our knowledge, a novel

hairpin-hinge model of Tat translocation, which is supported by signal peptide cross-linking experiments designed to test this model. This model elucidates how the precursor protein remains continuously bound to the TatBC complex while the mature domain migrates through the translocation pore.

## MATERIALS AND METHODS

### Bacterial strains, growth conditions, and plasmids

*E. coli* strains MC4100(DE3) and MC4100 $\Delta$ TatABCDE were described earlier (8,43). Bacterial cultures were grown in Luria-Bertani medium (44) at 37°C supplemented with ampicillin (50  $\mu$ g/mL). Plasmids encoding single cysteine mutants of pre-SufI were generated from pSufI-IAX by the QuikChange protocol (Agilent Technologies, Santa Clara, CA; see Table S1 for forward and reverse primers). pSufI-IAX encodes pre-SufI with mutations C17I and C295A and a stop codon after the C-terminal 6 $\times$ His-tag (36). Plasmids pTatBC, pTatAC, and pTatC, which encode the indicated Tat proteins under arabinose control, were generated by deleting TatA, TatB, and TatAB sequences from pTatABC (43), respectively. All mutants were confirmed by DNA sequencing (Beckman Coulter Genomics, Danvers, MA).

### Immunoblotting

SufI was detected by immunoblotting using rabbit polyclonal anti-SufI antibodies (43) or mouse anti-6 $\times$ His antibodies (No. MA1-21315; Thermo Fisher Scientific, Waltham, MA), both at 1:10,000 dilution. TatA, TatB, and TatC were detected using anti-TatA, anti-TatB, and anti-TatC antibodies (18,43) (1:5000 dilutions). All blots were probed in 1 $\times$  PBS (137 mM NaCl, 2.7 mM KCl, 10 mM Na<sub>2</sub>HPO<sub>4</sub>, 2 mM KH<sub>2</sub>PO<sub>4</sub>, pH 7.4) with 3% nonfat dry milk, 0.5% Triton X-100, and 0.5% Tween-20. Polyclonal goat anti-rabbit IgG-HRP conjugate (Santa Cruz Biotechnology, Dallas, TX) and polyclonal rabbit anti-mouse IgG-HRP conjugate (Cat. No. R-21455; Thermo Fisher Scientific) were used as secondary antibodies (both at 1:10,000), and bands were visualized by chemiluminescence (45). Band intensities were quantified with a phosphorimager (model FX; Bio-Rad Laboratories, Hercules, CA).

### Isolation of inverted membrane vesicles

Inverted membrane vesicles (IMVs) were isolated from *E. coli* strains MC4100(DE3) and MC4100 $\Delta$ TatABCDE with or without overproduced Tat proteins (induced with 0.7% arabinose), as described (29). The translucent brown band on the 0.5 M sucrose cushion contained the inner membrane fraction. Total protein was quantified as the absorbance at 280 nm in 2% SDS. Typical IMV stock solutions had an  $A_{280} \approx 45\text{--}55$ .

### Protein expression, purification, and dye labeling

Pre-SufI cysteine mutants were overproduced in BL21(DE3) (New England Biolabs, Ipswich, MA). All proteins were purified under native conditions by Ni-NTA chromatography. Luria-Bertani cultures (500 mL) were incubated at 37°C until the  $A_{600}$  reached 0.5–0.6. The pH of the culture was raised with 25 mL of 100 mM Tris, 25 mM CAPS, pH 9.0 and induced with 0.5 mM IPTG for 2.0 h. Cultures were chilled in an ice-bath and centrifuged at 5000  $\times g$  for 10 min at 4°C. Cell pellets were rapidly resuspended on ice in 40 mL lysis buffer (0.1% CellLytic B (Sigma-Aldrich, St. Louis, MO), 100 mM Tris, 25 mM CAPS, pH 9.0) containing 0.5 M urea, 250 mM NaCl, 20 mM imidazole,

0.2% Triton X-100, and protease inhibitors (10 mM phenylmethane sulfonyl fluoride (PMSF; from 0.2 M stock solution in isopropanol), 100  $\mu\text{g}/\text{mL}$  trypsin inhibitor, 20  $\mu\text{g}/\text{mL}$  leupeptin, and 100  $\mu\text{g}/\text{mL}$  pepstatin). The cell lysate was centrifuged at  $50,000 \times g$  for 10 min at  $4^\circ\text{C}$ , and the cleared supernatant was stirred with 2 mL Ni-NTA Superflow resin (Qiagen, Hilden, Germany) that had been preequilibrated with lysis buffer for 10 min on ice (36). The protein-saturated resin was transferred to a  $10 \times 1$  cm column, and washed as described earlier (5). The 6 $\times$ His-tagged protein was eluted with 250 mM imidazole, 20 mM Tris, 50 mM NaCl, 50% glycerol, and pH 8.0. Pre-SufI concentrations were determined by SDS-PAGE using bovine serum albumin as a standard. Spot intensities after Coomassie Blue staining were quantified with a model FX phosphorimager. Purified pre-SufI proteins were reduced with 1 mM tris[2-carboxyethyl]phosphine hydrochloride (TCEP) for 10 min and labeled with a 10-fold molar excess of BODIPY-FL maleimide (Thermo Fisher Scientific) for 20 min in the dark at room temperature. Reactions were quenched with 10 mM  $\beta$ -mercaptoethanol ( $\beta$ -ME), and excess dye was removed using a Zeba Spin Desalting Column, 7K MWCO (Thermo Fisher Scientific), according to the manufacturer's instructions. The concentration of BODIPY-FL in solutions was determined from their absorbance ( $\epsilon_{504} = 90,000 \text{ M}^{-1} \text{ cm}^{-1}$ ). Typical dye-to-protein concentration ratios after labeling suggested that 80–90% of the cysteines were successfully tagged.

## Membrane binding

Membrane binding reactions (35  $\mu\text{L}$ ) were performed in Binding Buffer (BB; 5 mM  $\text{MgCl}_2$ , 50 mM KCl, 200 mM sucrose, 1.5% polyvinylpyrrolidone (40,000 average molecular weight), 25 mM MOPS, 25 mM MES, pH 8.0) as described (36). In short, pre-SufI (90 nM) was incubated with IMVs ( $A_{280} = 2$ ) at  $37^\circ\text{C}$  for 10 min in protein LoBind microcentrifuge tubes (Eppendorf, Hamburg, Germany). Reaction mixtures were centrifuged at  $16,200 \times g$  for 30 min at  $4^\circ\text{C}$  to sediment the IMVs. The pellets were washed with BB (200  $\mu\text{L}$ ) and centrifuged again under the same conditions. The reisolated precursor-bound IMVs were suspended in BB for further experiments.

## Transport reactions

In vitro Tat transport assays (35  $\mu\text{L}$ ) were performed in Translocation Buffer (5 mM  $\text{MgCl}_2$ , 50 mM KCl, 200 mM sucrose, 57  $\mu\text{g}/\text{mL}$  bovine serum albumin, 25 mM MOPS, and 25 mM MES, pH 8.0) (5). Solutions of IMVs ( $A_{280} = 5$ ) and pre-SufI (90 nM) were prewarmed at  $37^\circ\text{C}$  for 5 min before the addition of NADH (4 mM). Reactions were incubated at  $37^\circ\text{C}$  for 30 min, and then quenched in an ice bath for 2 min. The samples were digested with proteinase K (0.73 mg/mL) for 40 min at room temperature. Digestions were quenched with PMSF (68 mM), diluted twofold with 2 $\times$  Gel Buffer (4% SDS, 10% glycerol, 0.04% bromophenol blue, 0.4%  $\beta$ -ME, 10 M urea, 200 mM Tris, pH 6.8), and incubated in a boiling water bath for 10 min. Samples were centrifuged briefly at  $16,000 \times g$ , and then were resolved by 8% SDS-PAGE with known standards. Gels were electroblotted onto PVDF membranes and immunoblotted with anti-SufI antibodies.

## Fluorescence quenching

All fluorescence measurements were made on an SLM 8100 spectrofluorometer (OLIS, Bogart, GA). For nitroxide quenching assays, samples of IMV-bound BODIPY-labeled precursor protein were resuspended in 0.8 mL BB, aliquoted into a  $4 \times 4$  mm quartz microcell maintained at  $37^\circ\text{C}$ , and mixed with a  $2 \times 2$  mm magnetic Teflon-coated stir bar. Fluorescence emission intensity was collected continuously using excitation and emission wavelengths of 495 and 510 nm, respectively, with a typical band-

pass of 4 nm. The nitroxide quenchers, 3-Carboxy-PROXYL (3-CP) and 5-DOXYL and 16-DOXYL stearic acids (5-D and 16-D; Sigma-Aldrich), were solubilized in DMSO (3 M for 3-CP; 20 mM for 5-D and 16-D) and were used to probe the accessibility of the BODIPY probe. Averaged fluorescence readings were recorded at least 200 s after each addition of nitroxide quencher to allow the signal to stabilize. For the urea dependence of tryptophan fluorescence, purified pre-SufI(Q31C/Y221C) (10 nM) was suspended in 0.8 mL of BB and the fluorescence was measured continuously using excitation and emission wavelengths of 295 and 340 nm, respectively. Readings were recorded at least 300 s after each addition of 9 M urea in BB. For reduced pre-SufI(Q31C/Y221C), the protein was pre-treated with 1 mM TCEP.

## Protease susceptibility

Pre-SufI(Q31C/Y221C) (0.2 mM) was preincubated with low (0.35 M) or high (2 M) urea concentrations in 50 mM Tris-HCl buffer, pH 7.2 for 15 min, and then incubated with 10  $\mu\text{g}/\text{mL}$  proteinase K ( $\geq 30 \text{ U}/\text{mg}$ ; Thermo Fisher Scientific) for 30 min at room temperature. Digestions were stopped by addition of 3  $\mu\text{L}$  0.2 M PMSF.

## Photocross-linking

For UV photocross-linking reactions, single cysteine mutants of pre-SufI were labeled with 4-(*N*-maleimido)benzophenone (46) (Sigma-Aldrich) and reperified using the protocol used to attach the BODIPY dye. Benzophenone-modified pre-SufI was incubated with IMVs for 10 min at  $37^\circ\text{C}$  in LoBind tubes as described for the membrane binding assay. Cross-linking was initiated in a Stratilinker UV Crosslinker 1800 (Agilent Technologies) by 254 nm irradiation for 5 min in an ice-bath (open upright tubes within 1 inch of the UV bulbs). Irradiated samples were centrifuged at  $16,200 \times g$  for 30 min at  $4^\circ\text{C}$  to sediment precursor protein bound to IMVs. Reisolated IMVs were analyzed via SDS-PAGE and immunoblotting. For transport assays following photocross-linking, the irradiated samples were incubated for 10 min in a  $37^\circ\text{C}$  water-bath before the addition of NADH (4 mM). Reactions were incubated at  $37^\circ\text{C}$  for 30 min, and then quenched in an ice bath for 2 min. The samples were centrifuged at  $16,200 \times g$  for 30 min at  $4^\circ\text{C}$  and the pellets were analyzed via SDS-PAGE and immunoblotting. To reduce TatC aggregation, samples that were probed for TatC cross-links were not boiled.

## Mass spectrometry

Purified pre-SufI samples were digested with trypsin using the filter-aided sample preparation method (47) with slight modifications to detect the disulfide under nonreducing conditions. Samples (200  $\mu\text{L}$ ,  $\sim 50 \mu\text{g}$ ) were divided into two equal aliquots, which were then denatured by the addition of 250  $\mu\text{L}$  8 M urea, 0.1 M Tris-HCl, pH 8.5 with or without the disulfide-reducing agent dithiothreitol (DTT; 100 mM) in a microfilter centrifuge tube with a 10-kDa cutoff-filter (Nanosep 10K; Pall, Port Washington, NY). Samples were washed three times with 500  $\mu\text{L}$   $\text{NH}_4\text{HCO}_3$  buffer (50 mM, pH 8.0), and then digested with sequencing grade trypsin (1:50 enzyme/protein; reaction volume = 50  $\mu\text{L}$ ) for 16 h at  $37^\circ\text{C}$ . The digestion products were then filtered through a 10-kDa microfilter (described earlier) and air-dried with a stream of nitrogen gas. Samples were solubilized in 20  $\mu\text{L}$  0.1% formic acid (FA) and injected (3  $\mu\text{L}$ ) into the mass spectrometer.

Mass spectrometry (MS) experiments were performed at the University of Texas Medical Branch Mass Spectrometry Core Facility. Liquid chromatography-tandem mass spectrometry (Nano LC-MS/MS) was performed on an Orbitrap Fusion system (Dionex, Sunnyvale, CA) with collision-induced dissociation (CID) and electron transfer dissociation capability, coupled with an UltiMate 3000 nano-LC and autosampler

(Dionex). Samples were injected into a nano-trap (C18 PepMap 100, 100  $\mu\text{m}$  (i.d.)  $\times$  1 cm (length)) that was connected to a C18 reverse-phase home-packed column containing 5  $\mu\text{m}$  SB-C18 beads (75  $\mu\text{m}$   $\times$  10 cm, ZORBAX; Agilent Technologies) using a flow rate of 400 nL/min. Solutions A (5% acetonitrile, 0.1% FA) and B (100% acetonitrile, 0.1% FA) were used to separate the polypeptide fragments as follows: 0–5 min, isocratic with 0% B; 5–45 min, linear gradient to 50% B; 45–52 min, linear gradient to 90% B; 52–60 min, linear gradient to 0% B. The eluent was sprayed through a charged emitter tip (PicoTip Emitter, 10  $\pm$  1  $\mu\text{m}$ ; New Objective, Woburn, MA) into the mass spectrometer under the following conditions: +2.2 kV tip voltage, FTMS mode (Orbitrap; Dionex) for MS acquisition of precursor ions (resolution 120,000 full width half-maximum), and ITMS mode (linear ion trap) for subsequent MS/MS of the top 10 most abundant ions. CID was used to perform MS/MS.

The MS data were analyzed by searching for expected  $m/z$  values assuming +2, +3, and +4 ionizations states using the Xcalibur Qual Browser (Thermo Fisher Scientific). In silico fragmentation signatures of cross-linked peptides were calculated using the NIST Mass and Fragment Calculator Software (<http://www.nist.gov/mml/bmd/bioanalytical/massfragcalc.cfm>) and compared with observed fragmentation patterns. The disulfide percentage was estimated by comparing the total ion intensities for one of the cysteine containing peptides (residues 25–43) between the DTT treated and nontreated samples normalized to a closely eluting peptide, which was assumed to be invariant in the presence and absence of DTT.

### Purification of pre-SufI with an internally cross-linked signal peptide

As mass spectrometry ion intensities indicated that the internally disulfide-linked form of as-isolated pre-SufI(S12C/A25C) was only ~10–15% of the purified protein, the fraction of cross-linked protein was increased by incubating the sample with SulfoLink coupling resin (Thermo Fisher Scientific), which is activated with thiol-reactive iodoacetyl groups and thus binds the reduced form of the protein, and then recovering the unbound protein, most of which was cross-linked. The resin slurry (1 mL) was mixed with four resin-bed volumes of equilibration buffer (20 mM Tris, 50 mM NaCl, 250 mM imidazole, 50% glycerol, pH 8.0) and centrifuged (1,000  $\times$  g, 5 min). This equilibration/wash step was repeated five times. After the final wash, purified pre-SufI(S12C/A25C) (0.5 mL) was added to the resin. The mixture was shaken for 3 h at 4°C and centrifuged (1000  $\times$  g, 5 min). The supernatant contained ~60% internally disulfide-linked pre-SufI(S12C/A25C), as estimated from MS ion intensities using a single cysteine mutant, pre-SufI(S12C), and DTT-reduced pre-SufI(S12C/A25C) as controls.

### Signal peptide structural propensity and molecular docking

The secondary structure of *E. coli* Tat signal peptides was modeled using PEP-FOLD 1.5 (48). To probe the generality of the observed features (see Results), the probability of predicted secondary structures (helix,  $\beta$ , disordered) at different positions was determined using JPRED (49–51) for 512 bacterial Tat signal peptides (PROSITE: PS51318, <http://prosite.expasy.org/doc/PS51318>; 535 proteins manually curated to 512, includes both predicted and experimentally verified sequences). The secondary structures of five representative signal peptides were docked with the TatBC complex using ZDOCK (52). The TatBC complex was generated by docking residues L7–G21 of the TatB (PDB: 2MI2) membrane domain (53) onto the TatC structure (SWISS-MODEL: P69423). The sites of interaction between TatC (M205 and L206 of transmembrane domain 5 (TM5)) and TatB (L9, L10, and L11) were identified by cysteine-cysteine cross-linking results (12).

### Fluorescence quenching

The Stern-Volmer equation describing the effects of both dynamic and static quenching is

$$\frac{F_0}{F} = (1 + K_D[Q])(1 + K_S[Q]), \quad (1)$$

where  $F_0$  is the initial fluorescence,  $F$  is the fluorescence measured in the presence of a quencher at concentration  $[Q]$ , and  $K_D$  and  $K_S$  are the dynamic and static quenching constants, respectively (54). For all the mutant-quencher combinations in Fig. 2, a single quenching constant for each species present (lipid- and translocon-bound forms) was sufficient to fit the quenching data. Because static and dynamic quenching constants are indistinguishable in these types of quenching experiments and nitroxide quenching does not require contact with the fluorophore (55), we assumed that the quenching constants required to fit these data were the dynamic quenching constants. Consequently, the  $\Delta\text{Tat}$  data (Fig. 3, A–C) were fit to

$$\frac{F_0}{F} = (1 + K_D[Q]). \quad (2)$$

For fluorescent pre-SufI bound to Tat<sup>++</sup> IMVs, the lipid- and translocon-bound populations were expected to respond differently to the nitroxide quenchers. The total fluorescence in the absence of quencher is

$$F_0 = F_{0,L} + F_{0,T}, \quad (3)$$

where the subscripts  $L$  and  $T$  indicate the fluorescence arising from the precursor bound to the lipid and to the Tat translocon, respectively. In the presence of quencher,

$$F = F_L + F_T, \quad (4)$$

and, using Eq. 2,

$$F = \frac{F_{0,L}}{(1 + K_{D,L}[Q])} + \frac{F_{0,T}}{(1 + K_{D,T}[Q])}, \quad (5)$$

where it is assumed that the fluorescence emitted from the lipid- and translocon-bound precursor proteins was quenched according to the different dynamic quenching constants  $K_{D,L}$  and  $K_{D,T}$ , respectively. Dividing by  $F_0$  and taking the reciprocal yields the Stern-Volmer equation for a solution containing a fluorophore in two distinct environments:

$$\frac{F_0}{F} = \left[ \frac{1 - \alpha}{1 + K_{D,L}[Q]} + \frac{\alpha}{1 + K_{D,T}[Q]} \right]^{-1}, \quad (6)$$

where  $\alpha = F_{0,T}/F_0$  is the translocon-bound fraction.

For some mutant-quencher combinations, three distinct constants ( $K_{D,L}$ ,  $K_{D,T}$ , and  $\alpha$ ) were indeed required to fit the quenching data obtained in the presence of TatABC, as predicted by Eq. 6. However, an approximately linear relationship was often obtained under Tat<sup>++</sup> conditions, which is consistent with the condition that  $K_{D,L} \approx K_{D,T}$ . Under these circumstances,  $\alpha$  was poorly constrained by the data. The range for  $\alpha$  was assumed to be 0.1–0.9, unless otherwise constrained by the data. This large range is conservative, leading to relatively high errors in  $K_{D,T}$  values, but reasonable because all  $\alpha$ -values constrained by quenching data were within this range (Fig. S4), all BODIPY-labeled pre-SufI mutants bound to the  $\Delta\text{Tat}$  membranes (Fig. S3 B), and all mutants were transport-competent (Fig. S3 A), and hence bind to the TatBC complex. The  $\alpha$ -value is constrained by the data in two ways: first, by fitting according to Eq. 6; and second, by the quenching observed under  $\Delta\text{Tat}$  and Tat<sup>++</sup> conditions. For this latter situation, assume  $a$ ,  $b$ , and  $c$  are the total quenching observed ( $F_0/F$ ) under  $\Delta\text{Tat}$ ,



Tat<sup>++</sup>, and translocon-bound only conditions ( $a < b < c$ ). Then,  $F/F_0 = 1/b$  under Tat<sup>++</sup> conditions is given by

$$\frac{1}{b} = (1 - \alpha) \frac{1}{a} + \alpha \frac{1}{c}. \quad (7)$$

Solving for  $1 - \alpha$  (the lipid-bound fraction) yields

$$1 - \alpha = \frac{(1/b) - (1/c)}{(1/a) - (1/c)} < \frac{a}{b}, \quad (8)$$

implying that  $\alpha > 1 - a/b$ . For  $a > b > c$ , the lower limit for  $\alpha$  occurs when  $c = 1$ , leading to  $\alpha \geq (b - a)/b(1 - a)$ . For  $a = b$  (implying that  $a = c$ ),  $\alpha$  could be any value from 0 to 1.

For some mutant-quencher combinations, the  $K_D$  determinations were considered unreliable or did not fit the simple model discussed in this section, and were therefore eliminated from further evaluation. These situations are indicated as \*, #, or ‡ in Fig. 3. In three cases (\*),  $K_{D,L}$  values were  $< -2$  mM, indicating enhancement of fluorescence, which was not expected. In five cases (#), upward or downward curvature (the latter under  $\Delta$ Tat conditions only) was observed, suggesting one or more quencher binding sites, or multiple environments of the fluorophore. In 1 case (‡),  $K_{D,T}$  was extremely poorly constrained by varying  $\alpha$  over a narrow range.

## Analysis

All of the data presented here represent a mean of at least three experiments and the error bars are the SE of the mean, unless otherwise indicated. Quenching constants were obtained by using the software KaleidaGraph (Synergy Software, Paramus, NJ) to fit the quenching data to Eqs. 2 or 6.

## RESULTS

### Fluorescence quenching approach to probe lipid and aqueous accessibility

To probe the environment and penetration depth of the Tat signal peptide during the initial stages of transport (Fig. 1, A and B), we used nitroxide quenchers to determine the relative accessibility of a BODIPY-FL fluorescent probe (Fig. S1) attached to different single cysteine mutants of pre-SufI, a natural Tat substrate. Nitroxide quenchers have a quenching distance of  $\sim 10$ – $12$  Å—it is typically assumed that fluorescence quenching occurs if the nitroxide approaches within this distance to the probe, and that quenching does not occur if the distance of closest approach is larger than this cutoff (55). 3-Carboxy-PROXYL (3-CP) (Fig. S1) is a water-soluble, membrane-impermeant nitroxide (56) that was used to determine if the BODIPY-FL probe was accessible from the *cis*-aqueous phase (Fig. 1 C). 5-DOXYL and 16-DOXYL stearic acids (5-D and 16-D) (Fig. S1) have nitroxides at the indicated positions on the 18-carbon saturated fatty acid. When added from aqueous stock solutions, fatty acids rapidly partition into both leaflets of lipid bilayers with their carboxylate headgroup at the aqueous-lipid interface and their hydrocarbon tail aligned with the lipid tails. Thus, guided by a previous study (57), we assumed that the fluorescence of a probe

positioned near the middle of the membrane bilayer would be better quenched by 16-D than 5-D (see Fig. S2) and that the fluorescence of a probe that shallowly penetrates the membrane would be strongly quenched by 5-D and moderately quenched by 3-CP and 16-D (Fig. 1 C).

Twenty-six different single cysteine pre-SufI mutants were generated (Fig. 1 D). In all cases, single cysteine mutants were labeled with BODIPY-FL maleimide. The fluorescence emission of BODIPY-FL is insensitive to environment hydrophobicity (58,59). The C-terminal cysteine mutant, pre-SufI(497C), served as our wild-type (wt) reference because a C-terminal dye does not affect transport efficiency (36). Transport efficiencies for most BODIPY-labeled pre-SufI mutants were  $\sim 80$ – $120\%$  of wt (Fig. S2 A), indicating a minimal effect of the probe on transport for most labeled proteins. Notable exceptions were the F8C and I9C mutants for which transport efficiencies were reduced to  $\sim 20\%$  and  $\sim 50\%$  of wt, likely because these sites are near the RR-motif (see Fig. 1 D).

### Hairpin insertion of the signal peptide

Representative plots for the concentration-dependent quenching of the fluorescence of BODIPY-labeled pre-SufI mutants bound to IMVs by 3-CP, 5-D, and 16-D are shown in Fig. 2. Although all 26 BODIPY-labeled pre-SufI mutants were analyzed with all three nitroxide quenchers in the presence and absence of TatABC, nine mutant-quencher combinations proved difficult to evaluate (see Materials and Methods) and were removed from the summary and analysis described below, which disregards these unusual situations. All of our binding experiments with BODIPY-labeled pre-SufI mutants were done in the absence of NADH (Figs. 1, 2, 3, and 4), and thus, the mature domain remained on the cytosolic side of the membrane.

In the absence of Tat translocons ( $\Delta$ Tat), the amount of quenching was linearly dependent upon the quencher concentration (typical Stern-Volmer quenching; Fig. 2, A–C). In the presence of overproduced TatABC (Tat<sup>++</sup>), the fluorescence quenching sometimes yielded a concave-down quadratic dependence on quencher concentration (Fig. 2, D–F), suggesting the presence of multiple fluorescent species with significantly different quenching constants (54). This interpretation is consistent with our earlier finding that the pre-SufI precursor protein binds to both the lipid surface and the Tat translocon (36). Although static and dynamic quenching are each possible for both the lipid- and translocon-bound precursor proteins, only a single quenching constant was necessary for each of the two species to fit the quenching data, which were assumed to be the dynamic quenching constants  $K_{D,L}$  and  $K_{D,T}$  for the lipid-bound (L) and translocon-bound (T) precursor proteins, respectively (see Materials and Methods). The  $\Delta$ Tat data were analyzed first to obtain  $K_{D,L}$  using Eq. 2, which assumes that the translocon-bound fraction ( $\alpha$ ) is zero. Using

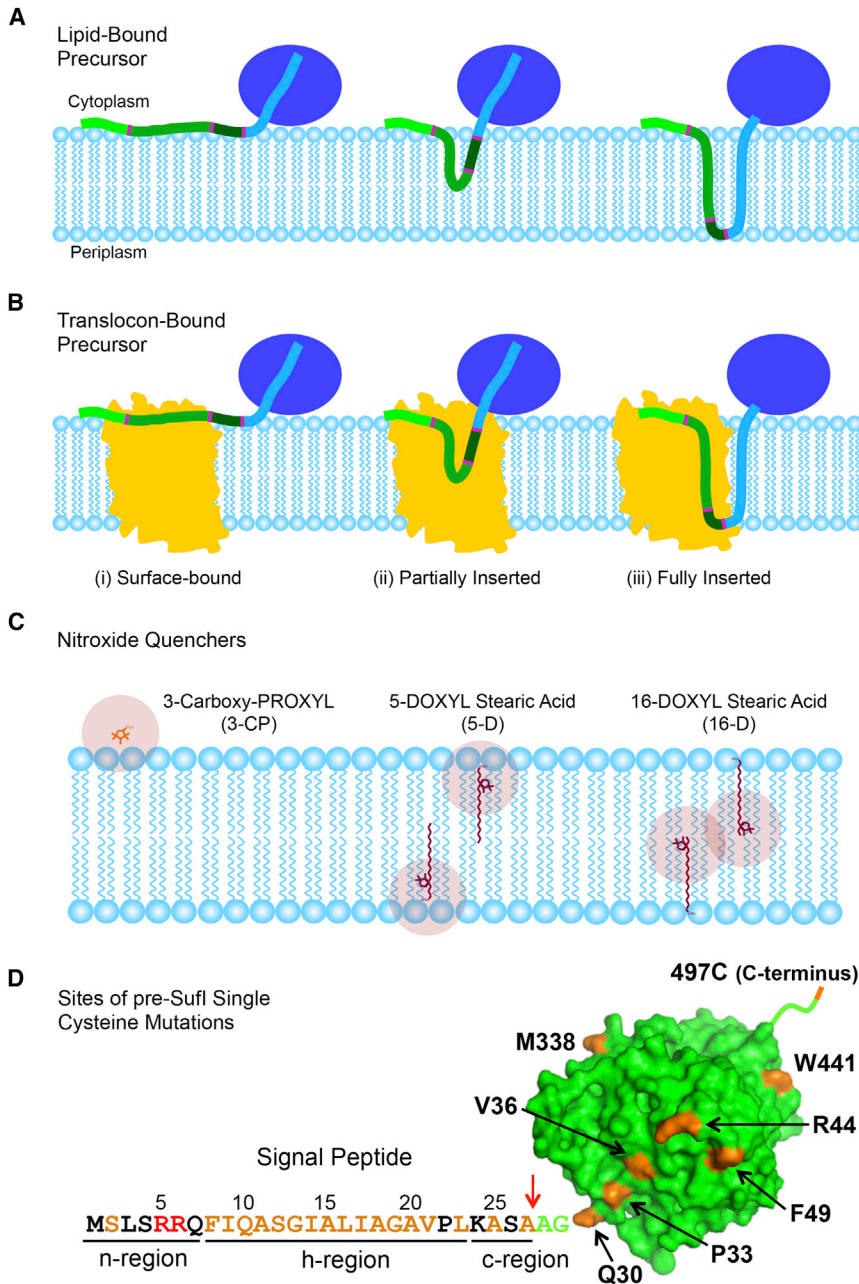

**FIGURE 1** Experimental strategy of the fluorescence quenching experiments. (*A* and *B*) Shown here are three possible modes of signal peptide interaction with both the lipids (*A*) and the Tat translocon (*B*). The light, medium and dark green colors denote the n-, h-, and c-regions of the signal peptide, respectively (N-terminal, hydrophobic, and C-terminal regions). Dark blue represents the folded mature domain, and light blue represents a portion of the mature domain that can potentially unravel allowing the majority of the mature domain to remain folded (see later). An outline of an *E. coli* model of the TatC structure is shown in yellow (SWISS-MODEL: P69423) (12). (*C*) Shown here is the approximate membrane penetration depth of the three nitroxide quenchers used in this study and their approximate quenching radii (~10–12 Å) relative to the membrane bilayer. 3-Carboxy PROXYL is membrane-impermeant, and the DOXYL stearic acids rapidly flip-flop between the two leaflets of the bilayer (55). (*D*) Shown here are locations in pre-SufI used to create single cysteine mutations. The three signal peptide regions and the pre-SufI mature domain (green; PDB: 2UXV) are identified. The 26 amino acids individually replaced with cysteine are identified in orange, the RR-motif is identified in red, and the signal peptidase I cleavage site is indicated by a red arrow.

this  $K_{D,L}$  value, we then estimated  $K_{D,T}$  and  $\alpha$  from the  $\text{Tat}^{++}$  data using Eq. 6. The corrected translocon-bound quenching curves (the prediction if all IMV-bound pre-SufI was bound to Tat translocons) are shown in Fig. 2, *G–I*. The corrected data are all linear because slope =  $K_{D,T}$  at the average acceptable  $\alpha$ -value. The quenching constants and the range of acceptable  $\alpha$ -values obtained using this approach are summarized in Figs. 3 and S4, respectively. Note that each labeled pre-SufI mutant can reasonably be expected to have small differences in binding affinity for the TatBC complex due to the position of the BODIPY dye in the signal peptide. Small differences in affinities are not

expected to influence our general conclusions. More importantly, however, the described approach specifically corrects for differences in translocon binding affinity.

The quenching constants obtained for the different pre-SufI mutants bound to the lipid or to Tat translocons revealed a strikingly different accessibility profile for the signal peptide under these two conditions. When pre-SufI was bound to membranes without Tat translocons, the fluorescence of the dye attached to all signal peptide mutants was largely unquenched by 5-D or 16-D (Fig. 3 *B*). In most cases, a moderate quenching was observed with 3-CP (Fig. 3 *A*, orange). Because the signal peptide mediates membrane binding of

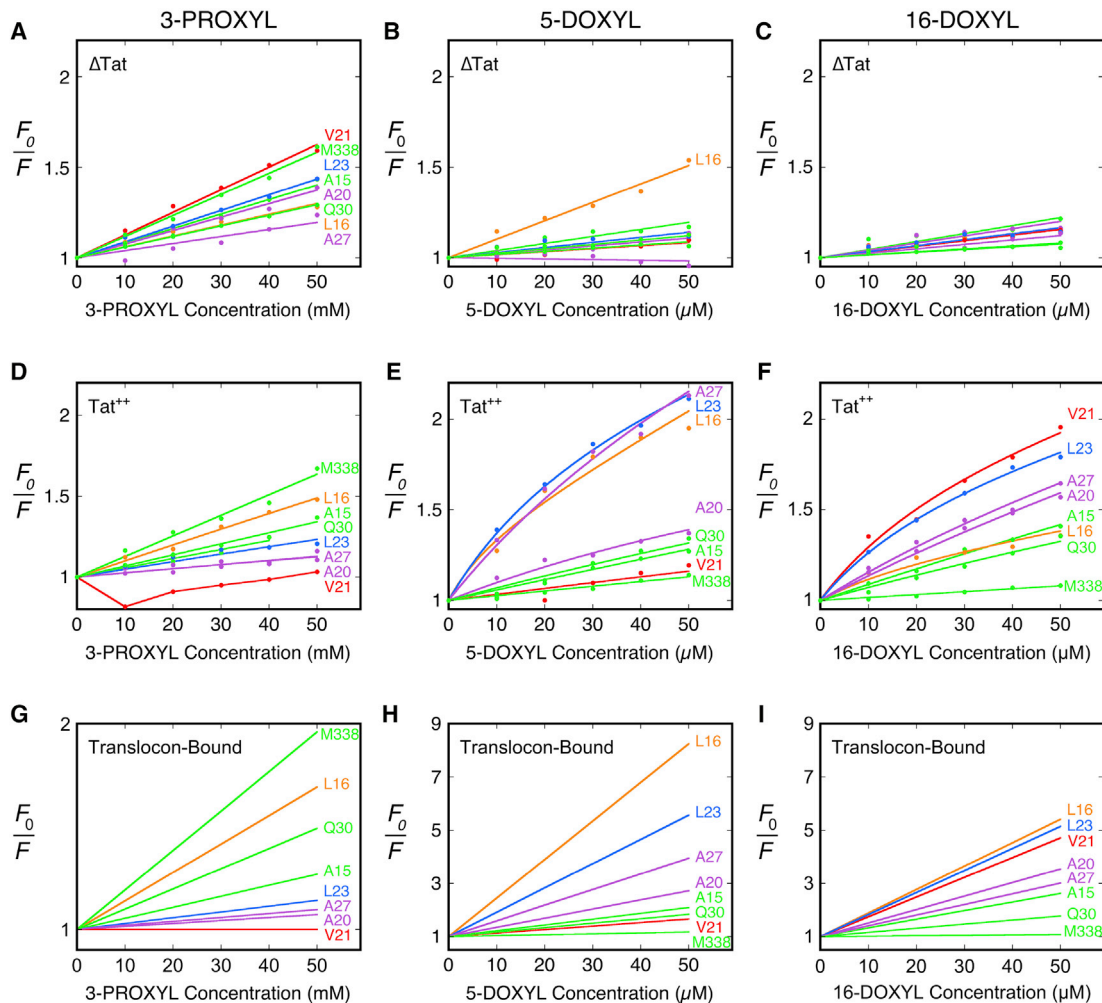

FIGURE 2 Stern-Volmer quenching of BODIPY-tagged pre-SufI single cysteine mutants bound to  $\Delta$ Tat and Tat<sup>++</sup> IMVs. (A–C) Shown here is the quenching of various BODIPY-tagged pre-SufI mutants bound to IMVs in the absence of Tat translocons ( $\Delta$ Tat) by (A) 3-carboxy-PROXYL (3-CP), (B) 5-DOXYL stearic acid (5-D), and (C) 16-DOXYL stearic acid (16-D). Data were fit to Eq. 2 (Materials and Methods), which assumes a single fluorescent species (lipid-bound pre-SufI) and dynamic quenching. The slope of each line yields  $K_{D,L}$ . (D–F) Same as (A–C), except in the presence of overproduced TatABC (Tat<sup>++</sup>). Data were fit to Eq. 6, which assumes two fluorescent species (lipid- and translocon-bound pre-SufI) and dynamic quenching, using the  $K_{D,L}$  values from (A), (B), and (C), respectively, and the average acceptable  $\alpha$ -value (see text, Fig. S4; Materials and Methods). (G–I) Shown here are predicted quenching curves for the quenching of translocon-bound pre-SufI mutants by 3-CP, 5-D, and 16-D. Slopes are the average  $K_{D,T}$  values (summarized in Fig. 3) obtained from the fits in (D–F), respectively, which were estimated from the  $K_{D,T}$  values obtained using the two extreme acceptable  $\alpha$ -values. The mutants shown and the color-coding is the same in all panels. For clarity, error bars are not shown, but were typically  $\sim 2$ –10% ( $N = 3$ , except for the V21C mutant, for which  $N = 6$  for all three quenchers for the Tat<sup>++</sup> conditions).

pre-SufI (36), these quenching data indicate that the signal peptide binds in the aqueous-lipid interfacial region, and that it does not significantly penetrate the membrane in the absence of Tat translocons (e.g., as in Fig. 1 A(i)). In contrast, it was concluded that a plant Tat precursor protein fully inserts its signal peptide into the membrane in the absence of any Tat proteins (38,40). In the presence of Tat translocons, there was a substantial increase in 5-D and 16-D accessibility to the BODIPY-FL dye attached to signal peptide residues downstream of the RR-motif. As a striking example, when TatABC was present, the V21C attached dye was inaccessible to 3-CP and 5-D, and substantially quenched by 16-D (Fig. 3 A (green), Fig. 3, C and D). Overall, numerous

dye-labeled residues within the signal peptide displayed a substantially increased quenching by the DOXYL stearic acids in the presence of Tat translocons. In contrast, the dye attached to surface-exposed residues of the mature domain far from the signal peptide (residues  $\geq 44$ ) was not accessible to the lipid quenchers. The simplest interpretation is that the signal peptide was inserted into the membrane by the Tat proteins and that the region around V21C was positioned near the center of the membrane bilayer (e.g., as a hairpin such as that depicted in Fig. 1 B(ii) or (iii)).

As discussed in the last paragraph, the nitroxide quenching data were interpreted from a global perspective rather than trying to decipher the reasons behind individual

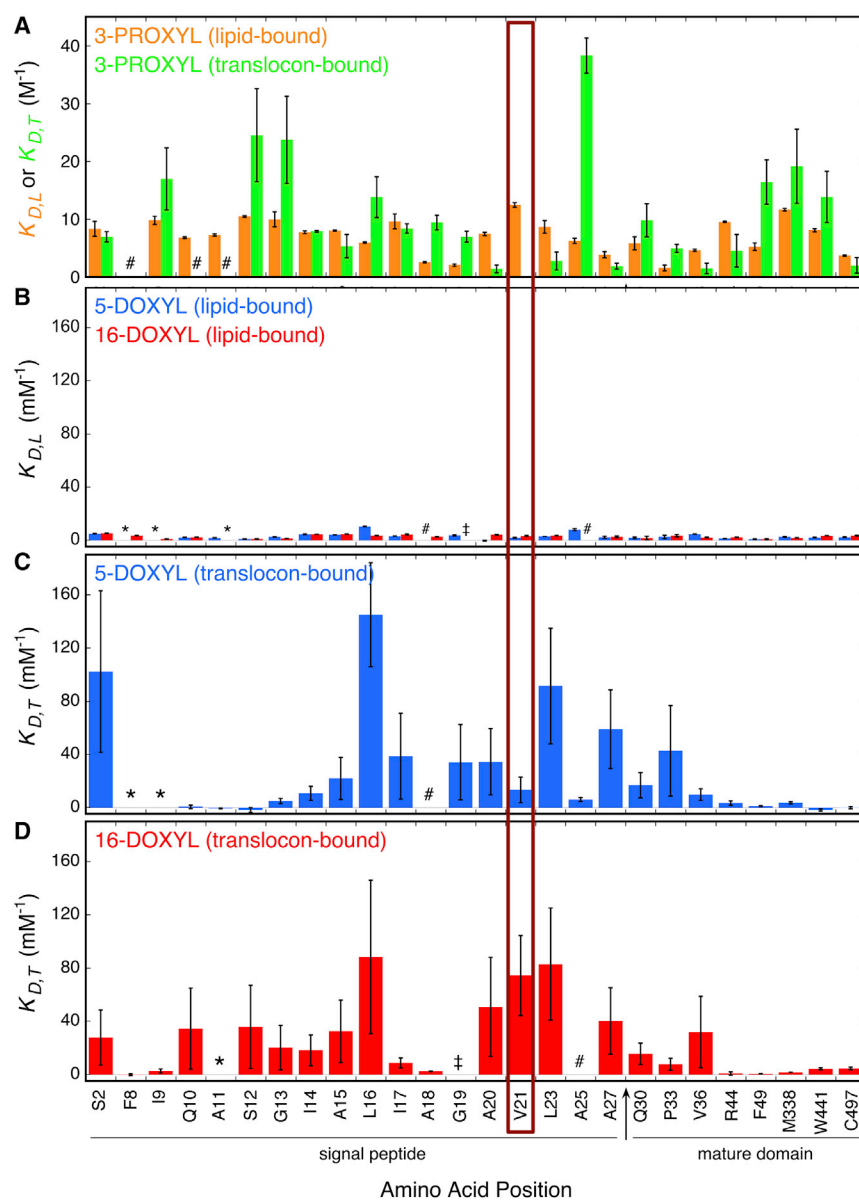

FIGURE 3 Hairpin insertion of the pre-SuffI signal peptide. (A–D) Shown here are quenching constants ( $K_{D,L}$  and  $K_{D,T}$ ) for BODIPY-labeled pre-SuffI single cysteine mutants, as indicated. The increase in quenching by the DOXYL stearic acids in the presence of TatABC for signal peptide residues (compare (C and D) with (B)) indicates insertion of the signal peptide into the membrane. These data indicate that the point of deepest penetration is near V21 (maroon box). For some mutant-quencher combinations, the  $K_D$  determinations were considered unreliable or did not fit the simple models described by Eqs. 2 and 6. These situations are indicated as \*, #, or ‡ and are discussed in Materials and Methods. For  $K_{D,L}$  values, errors are the standard error of the mean. For  $K_{D,T}$  values, error bar limits were determined by the limiting acceptable  $\alpha$ -values (see Materials and Methods; Fig. S4). This is a highly conservative method of determining error, which would typically be substantially smaller if translocon binding affinities were assumed not to vary for the different dye-labeled pre-SuffI mutants (i.e., if  $\alpha$  was constrained; see text for additional discussion). The  $K_D$  values for 5-D and 16-D are two-to-three orders of magnitude smaller than those for 3-CP because the stearic acids strongly partition into the membrane bilayer, which increases their local concentration (57).

quenching constants. There are multiple reasons why a smooth trend was likely not observed for the quenching constants as the dye probe was moved within the signal peptide: the fluorophore-nitroxide quenching distance of  $\sim 10$ – $12$  Å (which defines the resolution of the fluorescence method), the  $\sim 14$  Å tether length between the cysteine and the fluorescent probe (i.e., the probe could be a significant distance from its attachment site), the exact position/orientation of the fluorescent probe with respect to the signal peptide, and the likely possibility that the probe at each position is differentially protected from the quenchers by the Tat proteins. Together, these factors likely led to variability in the position of the probe relative to its attachment site and its accessibility to the nitroxide quenchers, which in turn likely led to the large changes in quenching constants as the probe

was moved in small steps along the signal peptide. Nonetheless, there is a striking global difference in probe accessibility in the absence and presence of Tat translocons (compare Fig. 3 B with Fig. 3, C and D).

### Signal peptide insertion requires TatB, TatC, and a functional signal peptide

We next tested the minimal essential protein requirements for hairpin insertion of the signal peptide. Previous work indicated that mutation of the RR-motif to KK blocks Tat transport (14) and results in loss of binding to the Tat translocon (36). Using our nitroxide quenching approach, we examined the effect of this KK mutation on the signal peptide insertion process using the V21C and L23C pre-SuffI mutants, both of



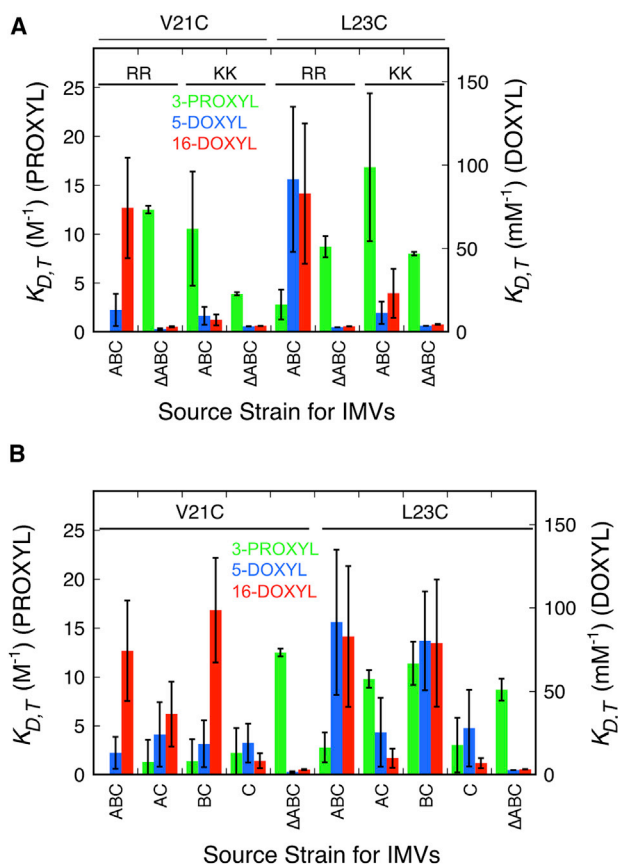

**FIGURE 4** Pre-SufI signal peptide insertion requires the RR-motif, TatB, and TatC. (A) Signal peptide insertion requires the RR-motif. The membrane-inserted nitroxide quenching signatures observed for the V21C and L23C BODIPY-tagged pre-SufI mutants under Tat<sup>++</sup> conditions (ABC) were lost when the RR-motif was replaced by KK. Instead, the observed signature resembles the lipid-bound signature obtained under  $\Delta$ Tat ( $\Delta$ ABC) conditions. (B) Signal peptide insertion requires TatB and TatC. The nitroxide quenching signatures for the V21C and L23C BODIPY-tagged pre-SufI mutants were examined in the presence of various combinations of overproduced TatA, TatB, and TatC. The DOXYL quenching diagnostic for membrane insertion required TatB and TatC. However, full protection from 3-CP for the L23C mutant also required TatA.

which yielded strong insertion signatures for all three nitroxide quenchers. For both the KK-V21C and KK-L23C mutants under Tat<sup>++</sup> conditions, 16-D quenching was largely eliminated and 3-CP quenching was strongly enhanced by the KK mutation (Fig. 4 A), indicating that recognition of the RR-motif by the Tat translocon is required for membrane insertion. We then selectively eliminated Tat proteins from the IMVs. The nitroxide quenching constants obtained for the V21C and L23C pre-SufI mutants indicate that the signal peptide insertion signatures were produced for 5-D and 16-D in the absence of TatA with only TatC and TatB present (Fig. 4 B). This is consistent with multiple previous studies that have identified a complex of TatC and TatB as the initial receptor complex for Tat precursor proteins (13–16,18,20,60). However, full protection from 3-CP for the L23C mutant additionally required TatA (Fig. 4 B),

agreeing with previous reports that indicate the presence of TatA in the receptor complex (20,26,60,61).

### The translocon-bound signal peptide hairpin of pre-SufI penetrates partway across the membrane bilayer

A hairpin loop that fully penetrates the membrane bilayer crosses the membrane midplane twice (see Fig. 1 B(iii)), and therefore, there could be two locations in pre-SufI where an attached dye molecule could be strongly quenched by 16-D and not by 5-D or 3-CP. We only observed one such location (V21C) in our quenching experiments (Fig. 3). Ultimately, the N-terminal end of the signal peptide (likely including the RR-motif) remains on the *cis* (cytoplasmic) side of the membrane (43,62), whereas the signal peptide cleavage site must reach the *trans* (periplasmic) side of the membrane, allowing signal peptidase I to release the signal peptide from the mature domain (43,63–65). The folded mature domain of pre-SufI begins at residue 30, and the signal peptide cleavage site is between residues 27 and 28. Therefore, for a model of the precursor-receptor complex in which the pre-SufI signal peptide cleavage site fully crosses the membrane whereas the mature domain remains on the *cis* side of the membrane, the mature domain must partially unfold (Figs. 1 A(iii) and B(iii) and 5 A). To test this possibility, the double cysteine mutant pre-SufI(Q31C/Y221C) was generated. Q31 and Y221 are close enough to form a disulfide after mutation to cysteines. This disulfide was expected to block/reduce unfolding of the mature region (Fig. 5 B). The presence of an internal disulfide cross-link in pre-SufI(Q31C/Y221C) was assessed by SDS-PAGE mobility shift, protease susceptibility, and denaturant-dependent tryptophan fluorescence (Fig. 5, C–E). A large fraction (~80%) of the as-isolated form of this double cysteine mutant protein migrated faster than its reduced form or the single cysteine mutant pre-SufI(497C), suggesting the presence of an internal disulfide cross-link (Fig. 5 C). This as-isolated protein was more resistant to protease and urea denaturation than wild-type pre-SufI (Fig. 5, D and E). These data support the hypothesis that the presence of a disulfide bond between residues 31 and 221 of pre-SufI enhanced the stability of the folded mature domain. Addition of TCEP, a disulfide-reducing agent, had essentially no effect on transport efficiency even in the linear portion of the saturation curve (<1 pmol pre-SufI; Fig. 5 F), indicating that the reduced and the internally cross-linked forms of pre-SufI(Q31C/Y221C) transport with similar efficiencies. In total, these data strongly support the hypothesis that mature domain unfolding does not occur during pre-SufI transport. Consequently, these data support a model in which the signal peptide cleavage site has not migrated across the membrane in the initial receptor-precursor complex. Unless the signal peptide binds to the Tat receptor complex in a fully extended conformation, the length of

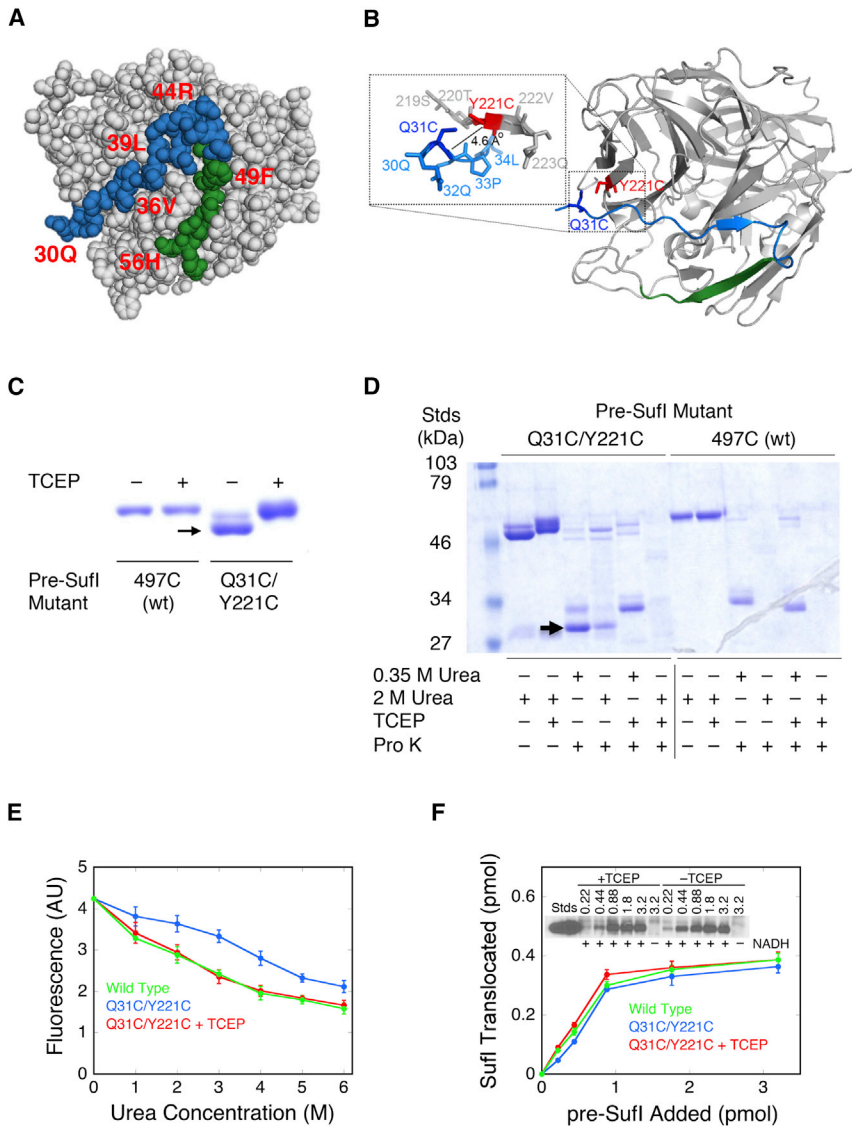

**FIGURE 5** The pre-SufI mature domain remains folded during transport. (A) Shown here are surface-exposed residues of the SufI mature domain (PDB: 2UXV) immediately downstream of the signal peptide cleavage site. Residues 30–47 (blue) and 47–55 (green) could potentially unravel to allow full signal peptide insertion (Fig. 1, A(iii) and B(iii)) whereas the rest of the mature domain could remain folded. The signal peptide cleavage site between residues 27 and 28 was not recovered in the structure. (B) Shown here is the structural proximity of the cysteines in the pre-SufI(Q31C/Y221C) double mutant. Residues Q31 (dark blue) and Y221 (red) are close enough ( $C_{\alpha}$ - $C_{\alpha} \approx 6.2 \text{ \AA}$ ;  $C_{\beta}$ - $C_{\beta} \approx 4.6 \text{ \AA}$ ) to generate a disulfide after mutation of both to cysteine. (C) Shown here is the disulfide in the purified pre-SufI(Q31C/Y221C) double mutant. On an SDS-PAGE gel, the as-isolated protein was detected as two bands, which coalesced into one band when reduced with TCEP (1 mM). As the upper/reduced band migrated similarly to the single cysteine pre-SufI(497C) (wt) protein, the lower band was assumed to be internally cross-linked protein (arrow;  $\sim 80\%$  of the total protein). (D) Shown here is the protease resistance of disulfide cross-linked pre-SufI(Q31C/Y221C). The as-isolated wt and pre-SufI(Q31C/Y221C) proteins were incubated with proteinase K (Pro K, 10  $\mu\text{g}/\text{mL}$ ) at room temperature for 30 min in the presence of low (0.35 M) or high (2 M) urea concentrations. A protease-resistant band (arrow) was observed under low urea and no TCEP conditions only for pre-SufI(Q31C/Y221C). (E) Shown here is the structural stability of disulfide cross-linked pre-SufI(Q31C/Y221C). Tryptophan fluorescence of wt pre-SufI decreased at higher urea concentrations, consistent with denaturation. The TCEP-reduced pre-SufI(Q31C/Y221C) protein behaved similar to wt. However, the fluorescence of the as-isolated pre-SufI(Q31C/Y221C) protein was less sensitive to urea concentration, consistent with an increased stability of the disulfide cross-linked protein. (F) Shown here is the *in vitro* Tat transport efficiency of disulfide cross-linked pre-SufI(Q31C/Y221C). Transport was unaffected by the presence (blue) or absence (red) of a disulfide cross-link. Transport conditions were as in Fig. S3 A.

the signal peptide hydrophobic domain is insufficient to cross the membrane bilayer twice. Instead, the propensity of h-domains of Tat signal peptides to adopt helical structures (see later Discussion) (37) suggest that the translocon-bound signal peptide hairpin of pre-SufI penetrates only partway, not completely, across the membrane bilayer (i.e., as in Fig. 1 B(ii) but not as in Fig. 1 B(iii)).

### Structural modeling of TatBC-signal peptide interactions

To establish a structural framework for understanding the implications of a translocon-bound signal peptide hairpin and to investigate whether partial membrane penetration of a signal peptide hairpin is generally feasible for Tat substrates,

we used a predictive/computational approach to probe signal peptide structural propensities and model their interactions with the TatBC complex. For the pre-SufI signal peptide, PEP-FOLD (48) predicted a short helix ( $\sim 21 \text{ \AA}$ ), beginning after the RR-motif followed by a C-terminal disordered region (Fig. 6 A). Using the ZDOCK docking algorithm (52), this unaltered signal peptide structure was readily accommodated inside the transmembrane groove on the side of TatC with its C-terminal region positioned near the known TatB binding region (Fig. 6 B), suggesting that the inherent structural propensity of the signal peptide is designed to be recognized by the receptor complex with minimal perturbations. To explore whether this design might be a general feature, signal peptide structures were predicted for 25 *E. coli* Tat substrates (Fig. S5). Notably, although the length of the helix

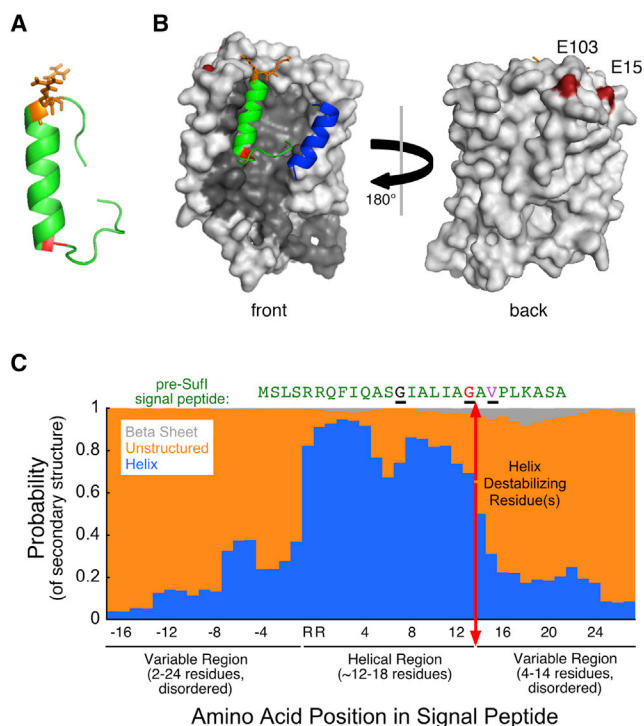

**FIGURE 6** Secondary structure of Tat signal peptides. (A) Shown here is the predicted secondary structure of the pre-SufI signal peptide (residues 1–27). The PEP-FOLD peptide structure prediction algorithm (48) yielded an h-region helix connected to an unstructured C-terminal region by a glycine (G) helix-breaking residue (red). The RR-motif (orange) is found at the N-terminal end of the helix. (B) Shown here is the pre-SufI signal peptide docked into the TatBC complex. Using ZDOCK (52), the TatB membrane domain (blue; residues L7-G21) was first positioned onto the TatC structure (gray; SWISS-MODEL: P69423) based on previous data indicating interactions with TM5 of TatC (12,26). The pre-SufI signal peptide structure from (A) was then docked into this TatBC complex (lowest energy interaction) without any conformational relaxation of the Tat proteins or the signal peptide. The resultant signal peptide/receptor complex structure is consistent with the hairpin insertion by the TatBC complex. The RR-motif is near the two glutamic acid residues (dark red; E15 and E103) at the top of TatC involved in binding this motif, the tip of the hairpin is near the center of the bilayer, and the C-terminal end of the signal peptide is near TatB (see later cross-linking studies and the Discussion). (C) Shown here is the predicted secondary structures for 512 Tat signal sequences. The JPred structural propensity algorithm (50) predicts that the RR-motif and h-domain are largely helical, and that this central region of Tat signal peptides is flanked by unstructured domains. One or more helix-destabilizing residues (see text) at the C-terminal end of the h-domain helix is consistent with the bend necessary to form a hairpin. Note that some signal peptides have one or more helix-destabilizing residues within the h-domain (e.g., G13 of pre-SufI; black) before the helix-destabilizing residue(s) at the end of the helical domain (e.g., G19 of pre-SufI; red) (see also Fig. S6). V21, which deeply penetrates the membrane (Fig. 3) when the pre-SufI signal peptide is bound to TatBC, is identified in purple. Black underlines help to identify these three residues in the pre-SufI sequence.

immediately following the RR-motif varied considerably, the C-terminal end of the helix was typically followed by a glycine (80%), a known helix-destabilizing residue (66). Helix termination is necessary for generating a hairpin. Although the position of this glycine residue was variable, it was

commonly found 12–17 residues away from the RR-motif (Fig. S6). Four representative signal peptide structures were docked into the TatBC receptor complex (Fig. S7). Extending our analysis, JPred (50) was used to predict the secondary structural propensities of 512 bacterial Tat signal peptides, including both predicted and experimentally verified Tat substrates. This analysis revealed a strong preference for a helical region following the RR-motif (Fig. 6 C), followed by a strong preference for a glycine residue (Fig. S8). Generalizing, our analysis suggested that Tat signal peptides are organized with five structural features (in order): 1) a disordered region of variable length; 2) the RR-motif; 3) a helical structure (typically ~12–17 amino acids); 4) one or more helix destabilizing residues (usually glycine—see Discussion); and 5) a second disordered region of variable length (Fig. 6 C). These design similarities suggest that a single binding pocket could accommodate the diversity of Tat signal sequences.

### Signal peptide binding interactions with the TatBC complex

Fluorescence quenching data revealed that membrane insertion of the signal peptide requires both TatB and TatC (Fig. 4). To more precisely probe the interactions of the signal peptide hairpin structure with the TatBC complex, we turned to photocross-linking. Single cysteine mutants of pre-SufI were labeled with 4-(maleimido)benzophenone (Fig. S1), which has a linker length of ~9–11 Å (67), and photocross-linking was induced by UV illumination after incubating the benzophenone derivatives of pre-SufI with Tat<sup>++</sup> IMVs. TatB was the most frequently cross-linked translocon protein, yielding an adduct of ~80 kDa. Out of 18 signal peptide mutants, major cross-links (detected in 100% of attempts) to TatB were observed when the photocross-linker was attached at positions V21, L23, A25, and A27 of pre-SufI. A major cross-link between the SufI mature domain (Q30) and TatB was also observed. A major cross-link to TatC (also an adduct of ~80 kDa) was only observed for the V21 mutant. Cross-links to TatA were not observed. The major TatB and TatC cross-linked products were also observed on a 6×His immunoblot, which probes for SufI (Fig. 7 A). These data suggest that the C-terminal half of the signal peptide hairpin contacts TatB, and that the hinge region (near V21) contacts both TatB and TatC (Fig. 7 B).

### Hairpin-hinge hypothesis

The data discussed thus far strongly suggest that a signal peptide hairpin of pre-SufI is inserted into the membrane by the TatBC receptor complex and reaches about halfway across the membrane. During the translocation process, the mature domain and the C-terminal end of the signal peptide must migrate across the membrane, whereupon the signal peptide is cleaved from the precursor protein in the periplasm by the LepB protease (signal peptidase I) (43,63–65). How can this



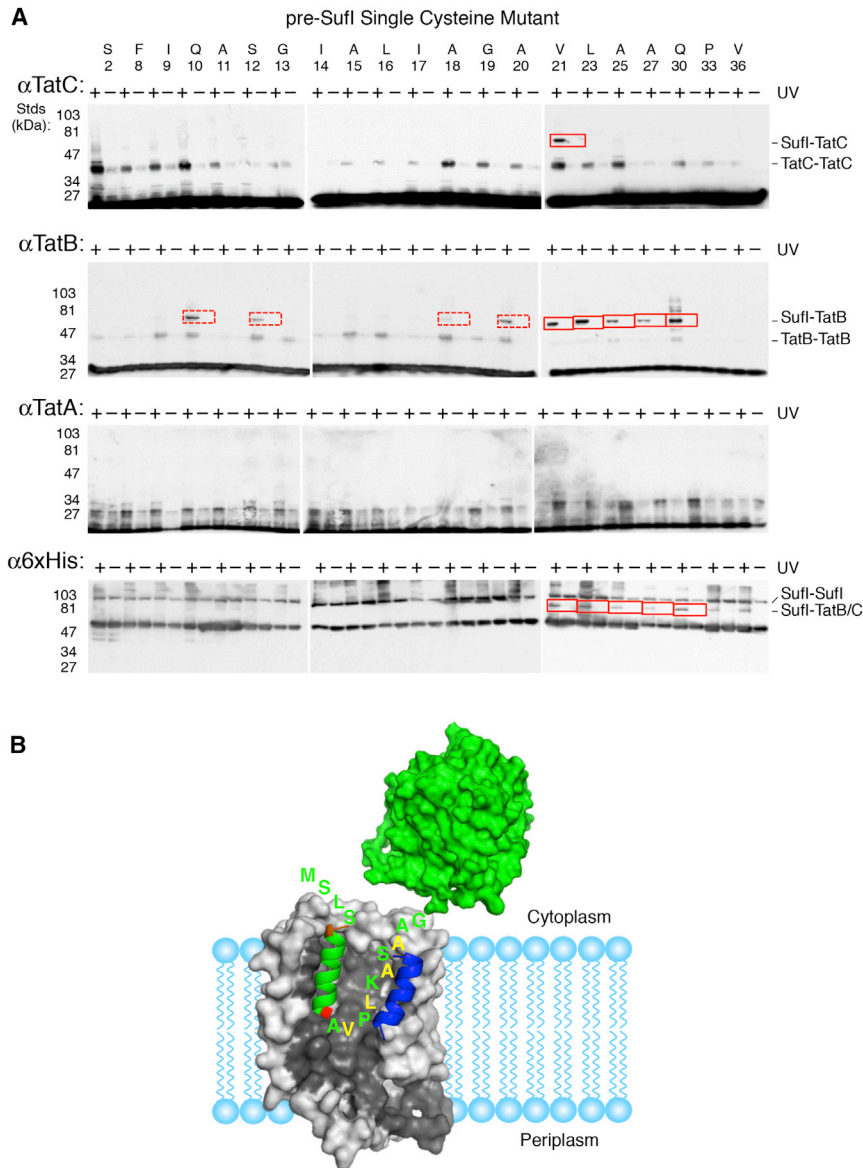

**FIGURE 7** Photocross-linking of pre-SufI single cysteine mutants with Tat components. (A) Shown here is cross-linking of pre-SufI with TatABC. The indicated single cysteine mutants of pre-SufI were modified with 4-(maleimido)benzophenone, incubated with Tat<sup>++</sup> IMVs, and irradiated with UV light for 5 min. Membrane-bound pre-SufI was recovered by centrifugation (16,200  $\times$  *g*, 30 min). The samples were resolved via SDS-PAGE and immunoblotted with TatA, TatB, TatC, and 6 $\times$ His antibodies as indicated. Pre-SufI-TatB and pre-SufI-TatC adducts are both  $\sim$ 80 kDa. Major (*solid red box*) and occasional (*dashed red box*) cross-links were observed in 100% and  $<$ 50% of reactions, respectively ( $N \geq 3$ ). (B) Shown here is a cartoon of the interaction of the C-terminal half of the pre-SufI signal peptide hairpin with TatB. Highlighted residues (*yellow*) strongly cross-link to TatB (*blue*), as shown in (A). The helical domain of the signal peptide is colored as in Fig. 6 A, and its interaction with the TatC structure (*gray*) is reproduced from Fig. 6 B. The globular pre-SufI mature domain (*green*; PDB: 2UXV) remains cytoplasmic when bound to TatBC in the absence of a pmf.

translocation process occur while maintaining the signal peptide binding interaction? Flexibility at the point of deepest penetration of the signal peptide hairpin was suggested by the helix-destabilizing residue(s), typically glycine, discussed in [Structural Modeling of TatBC-Signal Peptide Interactions](#). Therefore, we hypothesized that unhinging of the signal peptide hairpin would allow mature domain translocation while the N-terminal half of the signal peptide remained anchored within its binding/recognition site (Fig. 8 A). To test this hairpin-hinge hypothesis, we introduced cysteines at S12 and A25 in the signal peptide of pre-SufI, anticipating that a disulfide cross-link between these two positions would block transport (Figs. 8, B and C). Mass spectrometry analysis established that a fraction ( $\sim$ 10–15%) of the as-isolated pre-SufI(S12C/A25C) protein was disulfide cross-linked (Figs. 8, D and E; Fig. S9 A).

In vitro Tat transport assays with an enriched preparation of the disulfide-linked pre-SufI(S12C/A25C) protein revealed that DTT significantly enhanced transport yield, particularly at lower precursor concentrations (by  $\sim$ 3–5-fold; Fig. 8 F). These data are consistent with the hypothesis that the cross-linked protein cannot be transported (or is transported substantially less efficiently than the uncross-linked protein). Importantly, the internal disulfide did not reduce membrane and translocon binding efficiency (Fig. 8 G; Fig. S10), indicating that the cross-link does not interfere with binding to the TatBC complex, as expected (Fig. 8 C), although the cross-linked protein may not bind to the TatBC complex in the same conformation as the un-cross-linked protein. Cross-linking of the V21C mutant to TatC blocked pre-SufI transport (Fig. S11), consistent with the hypothesis that signal peptide residues after the hinge residue (G19)



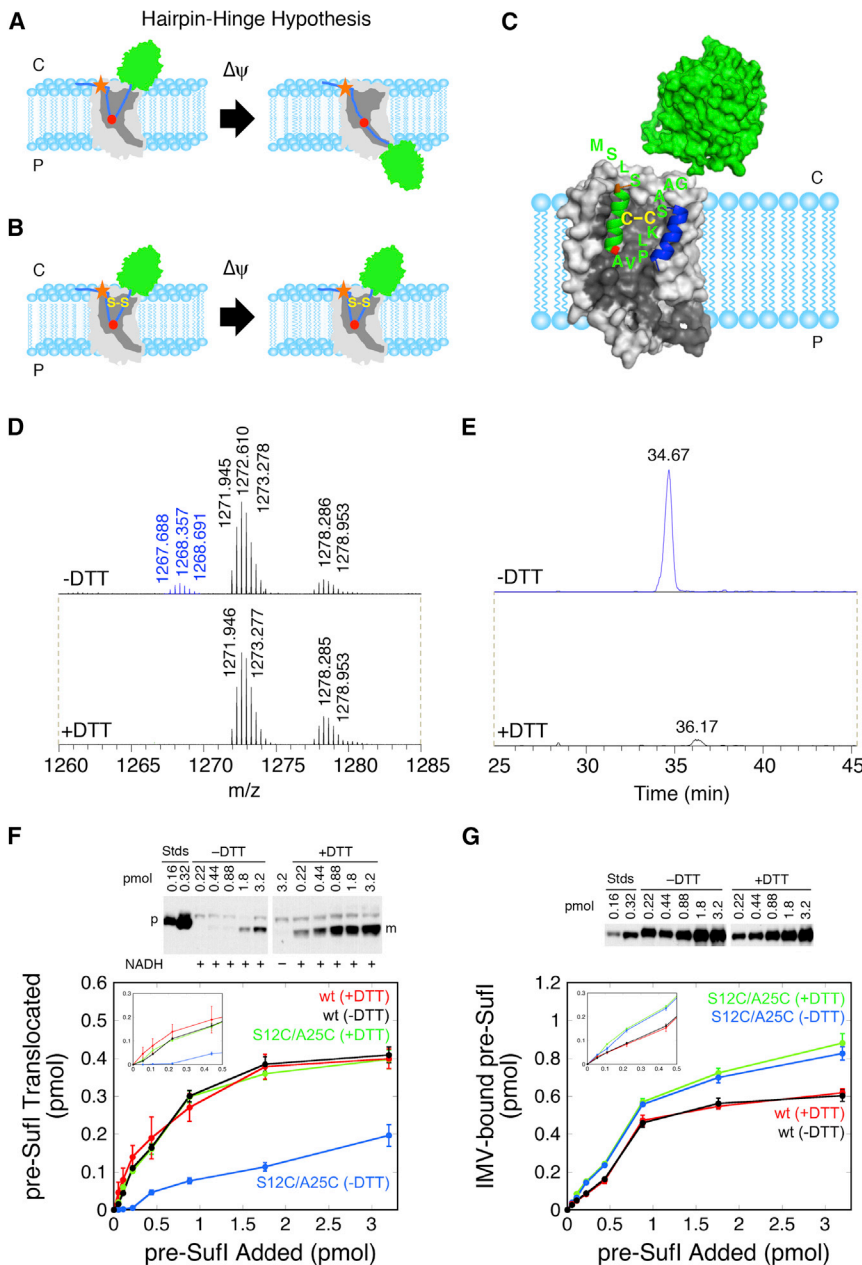

**FIGURE 8** Testing the hairpin-hinge hypothesis with an internally cross-linked signal peptide. (A) Shown here is the hairpin-hinge hypothesis. During translocation of the mature domain (green) from the cytoplasm (C) to the periplasm (P), the hairpin formed by the signal peptide (blue) is hypothesized to open via a hinge (high flexibility) region (red) at the tip of the hairpin. The position of the RR-motif is indicated (orange star). (B) Shown here is how a disulfide can block unhooking of the signal peptide hairpin. According to the hairpin-hinge hypothesis, an internally disulfide-cross-linked signal peptide hairpin cannot unhinge under energized conditions, thus blocking translocation. Binding is predicted to be unaffected (compare with (A)). (C) Shown here is the predicted interaction of the oxidized double-cysteine mutant pre-SufI(S12C/A25C) with the TatBC complex (compare with Fig. 7 B). (D) Shown here is liquid chromatography-tandem mass spectrometry analysis of trypsin-digested as-isolated pre-SufI(S12C/A25C). The peak centered at  $m/z = 1268.357$  is consistent with a +3H ion consisting of two peptides (amino acids 12–24 and 25–43) linked by a disulfide bond between S12C and A25C. Trypsin digests peptides after lysine and arginine residues—in particular, digesting pre-SufI(S12C/A25C) after R11, K24, and R43. Under +DTT conditions, the  $m/z = 1268.357$  peak was substantially diminished, consistent with reduction of the disulfide. Other peaks were unchanged and used for calibration. CID analysis confirmed the identity of the two indicated peptides (Fig. S9 A). (E) Shown here is extracted ion chromatography of the disulfide-linked peptide identified in (D). The ion intensity was reduced by  $\sim 97\%$  under +DTT conditions. (F) Shown here is the transport yield of pre-SufI(S12C/A25C). After enriching the disulfide-linked form of pre-SufI(S12C/A25C) to  $\sim 60\%$  (see Materials and Methods; Fig. S9 B), transport assays with Tat<sup>++</sup> IMVs were performed over a range of initial precursor concentrations. In the presence of DTT, pre-SufI(S12C/A25C) transported similarly to the pre-SufI(497C) (wt) protein. However, in the absence of DTT, pre-SufI(S12C/A25C) transport was substantially diminished. This effect was largest at lower precursor concentrations, suggesting that at higher concentrations more of the un-cross-linked protein is transported (*p*, precursor; *m*, mature). (G) Shown here is membrane-bound

pre-SufI(S12C/A25C). The high amount of pre-SufI(S12C/A25C) bound to Tat<sup>++</sup> IMVs in the presence and absence of DTT indicates that the lower transport yield observed under –DTT conditions in (F) cannot be explained by weaker membrane binding interactions. The disulfide cross-linked pre-SufI protein binds to Tat translocons with similar affinity as the wt protein (Fig. S10).

must move during transport. These data strongly support a model in which a conformational change in the signal peptide is required during transport, consistent with the hairpin-hinge hypothesis (Fig. 8 A).

## DISCUSSION

This work focuses on the interactions of the Tat signal peptide with the membrane lipids and the Tat translocon, and how the

conformational structure of the signal peptide changes during the translocation process. Our results revealed that: 1) in the absence of Tat proteins, the pre-SufI signal peptide binds to the phospholipid bilayer of IMVs, but does not penetrate significantly into the membrane; 2) the pre-SufI signal peptide is inserted into the membrane by the TatBC receptor complex, likely as a hairpin that extends approximately halfway across the membrane bilayer; 3) the C-terminal end of the pre-SufI signal peptide interacts extensively with

TatB; 4) the C-terminal portion of the pre-SufI signal peptide undergoes a significant conformational change during translocation, consistent with an unhooking of the initial hairpin structure; and 5) the general structural propensities of Tat signal peptides are consistent with a hairpin-hinge hypothesis describing signal peptide interactions and conformational changes. We now expand on these conclusions, and discuss a number of important implications.

Because nitroxides have a quenching distance of  $\sim 10\text{--}12$  Å (55), the fluorescence emission of a probe buried within the precursor-receptor complex could still be quenched by nitroxides. A useful point of scale is that quenching can occur if the probe is located at most an  $\alpha$ -helical diameter ( $\sim 12$  Å) away from the nitroxide quencher. Thus, signal peptide binding within the center of a receptor oligomer, such as in models described earlier involving dimeric, trimeric, or tetrameric TatBC structures (16–18,24–26,30,31), is formally consistent with the observed nitroxide quenching data. However, a protected signal peptide binding site seems inconsistent with the transport competence of lipid-bound precursor protein (36)—how can a lipid-bound signal peptide be transferred into the center of an oligomeric receptor complex without dissociating from the membrane? To us, the number of labeled positions yielding quenching suggests that direct exposure of the signal peptide to the lipid bilayer interior is more likely. A lipid-exposed binding pocket would be readily accessible to precursor bound to the membrane surface (34,36,38,40,68). Thus, we currently consider it more likely that the signal peptide binds to an outside surface of the receptor complex in contact with the membrane lipids. This conclusion does not rule out an oligomeric receptor complex, as long as the signal peptide binding site is on the periphery exposed to the membrane lipids. For example, an octomeric structure for the receptor complex, as suggested by multiple lines of evidence (13,14,22,23,27), could have lipid exposed signal peptide binding sites, particularly because electron microscopy provides evidence for binding of pre-SufI to the periphery of such a complex (27).

Our results generally agree with the current consensus on the identity and structural characteristics of the signal peptide binding site of the Tat receptor complex. There is general agreement that TatC and TatB form the core of the receptor complex (13–15), consistent with the results of our membrane insertion assay using various Tat deletion strains (Fig. 4). Our photocross-linking data (Fig. 7) indicate that L23, A25, A27, and Q30 of receptor-bound pre-SufI are near TatB while the hairpin bend region (V21) contacts both TatB and TatC. These data are consistent with previous results indicating that TatB interacts with the bound signal peptide (16,17,19) and with Cys-match cross-linking data demonstrating that the signal peptide interacts with L205 of *E. coli* TatC (V270 of cpTatC) (24). The latter result established an interaction of the signal peptide (seven residues from the cleavage site)

about halfway across the membrane in the TatC transmembrane groove near TatB, which interacts with TM5 of TatC (12,24,26). In total, these data form the basis for our placement of the signal peptide hairpin within the large groove formed on the side of the TatBC complex (Fig. 7 B).

Although the majority of TatA assembles with the receptor-precursor complex in the presence of a pmf (15,69), previous results differ over whether a fraction of TatA is a component of the receptor complex in unenergized membranes. Our membrane insertion assay revealed that the signal peptide insertion signature was not fully established without all three Tat proteins (TatABC). Nonetheless, this signature was mostly recovered with TatB and TatC only (Fig. 4 B, L23C mutant). The defect in the absence of TatA was a greater accessibility to 3-CP, suggesting greater aqueous accessibility within the signal peptide binding pocket. Hence, TatB and TatC may be sufficient to fully insert the signal peptide, but the pocket may be more open, consistent with the lower affinity observed in energized membranes without TatA (29). Such binding pocket differences may indeed be difficult to detect depending on the approach used, explaining why some investigators have concluded that the receptor complex is formed from TatB and TatC (18,20,70), whereas other have concluded that TatA must be a part of this complex (22,26,29,60,61,71,72).

Considering our structural model for signal peptide interactions with the TatBC receptor complex (Fig. 6 B), we were surprised by the paucity of cross-links to TatC (Fig. 7 A), particularly because previous investigators were more successful at obtaining such cross-links (16,24,25). However, Western blotting, as we used here, is less sensitive to detecting inefficiently formed cross-links than autoradiography, which was used in the previous studies. In addition, the photocross-linking efficiency of benzophenone toward the different amino acid side chains varies considerably, with hydrophobic side chains typically having moderate reactivity (73). Thus, photocross-linking efficiency to the hydrophobic TatBC pocket was expected to be moderate, at best. The size of the photocross-linking agent could certainly influence signal peptide interactions with the binding pocket, although we note that the BODIPY probe is actually a bit larger (Fig. S1) and it had little influence on transport, in most cases (Fig. S3 A). The signal peptide binding pocket must accommodate a diverse set of sequences, and therefore, it is unlikely that recognition occurs through a tight lock-and-key type of interaction. Consequently, a fair amount of flexibility in signal peptide interactions and orientation are likely, and thus, a bulky side chain (or attached probe) may simply cause the signal peptide to reorient in the pocket. Such reorientation, according to our model, would likely force the dye or photocross-linker to often be extended toward the lipids, rather than toward the receptor surface, resulting in ready accessibility to nitroxide quenchers, but reducing cross-linking probability.

It was concluded earlier that TatC alone catalyzes insertion of the signal peptide (18). According to this work, six additional residues in the pre-SufI signal sequence enabled the signal peptide cleavage site to reach the periplasmic side of the membrane where the signal peptide was removed by signal peptidase (18). The pre-SufI membrane insertion reported herein differs from the insertion of this extended signal sequence construct (pre-SufI-ss-ex) on three points. First, the nitroxide fluorescence quenching signature diagnostic for pre-SufI signal peptide insertion in the presence of TatABC was not observed with TatC alone (Fig. 4 B). Therefore, pre-SufI-ss-ex must interact differently with TatC than wild-type pre-SufI. Second, an internally cross-linked pre-SufI protein that cannot unfold to allow the signal peptide cleavage site to deeply insert into the membrane was fully transport-competent (Fig. 5). Thus, the TatBC complex inserts the signal sequence of pre-SufI about halfway across the membrane with the signal sequence cleavage site near the cytoplasmic face of the membrane. And third, an internal disulfide cross-link within the pre-SufI signal peptide was fully competent for binding to the Tat receptor complex (Fig. 8). This disulfide between residues 12 and 25 establishes the “register” of the hairpin, because the binding of pre-SufI was unaffected when the signal peptide was locked by this cross-link. These data further establish that the signal peptide cleavage site in the pre-SufI/receptor complex is near the cytoplasmic side of the membrane. Thus, if pre-SufI-ss-ex is indeed cleaved on the periplasmic side of the membrane, the six additional residues in its signal sequence do not simply allow a slightly deeper membrane penetration, but instead enable a substantially different interaction.

The presence of a helix-destabilizing glycine residue immediately after the helical N-terminal portion of the inserted pre-SufI hairpin suggested flexibility, leading to the proposal of a hinge near the tip of the signal peptide hairpin. This hinge hypothesis was tested by determining whether mature domain translocation could occur when the signal peptide was cross-linked to the receptor complex. As the hairpin-hinge hypothesis predicts, translocation did not occur when the V21 position, two residues after the postulated pre-SufI hinge glycine, was cross-linked to TatC (Fig. S11). These data establish that the hinge occurs before V21 of pre-SufI. These data are consistent with previous results that demonstrated no translocation when the signal peptide was cross-linked to Hcf106 (chloroplast TatB) in a region corresponding to the C-terminal half of a signal peptide hairpin (17). Moreover, the same report also demonstrated that transport occurred when the signal peptide was cross-linked to TatC near the RR-motif (17), consistent with the hairpin-hinge hypothesis (Fig. 8 A).

A bioinformatics approach was used to probe the generality of the hairpin-hinge translocation mechanism, and to predict common features in Tat signal peptides. Based on secondary structure predictions (Fig. S5) and observed frequencies and similarities over all 512 Tat signal peptides

examined (Fig. 6 C; Fig. S8), we conclude that a signal peptide helical motif is typically disrupted ~12–17 residues after the RR-motif by a single G (39%), S (4%), or P (5%) residue. In 46% of cases, more than one of these residues is present. G, S, and P are known helix-destabilizing residues (66,74). Although in 6% of cases a G, S, or P was not found 12–17 residues following the RR-motif, such residues were frequently found earlier, suggesting flexibility earlier in the signal peptide. Secondary structure predictions are consistent with the hypothesis that, in some cases, the hinge may occur earlier, leading to a shorter signal peptide hairpin (Fig. S5). A shorter helix before the hinge accounts for the dip in helix propensity 5–7 residues after the RR-motif in Fig. 6 C. In some cases, neighboring sequences seem sufficient to override the helix destabilization propensities of certain residues (Fig. S6)—for example, the pre-SufI signal peptide has a glycine-7 residues after the RR-motif (G13), yet a helical structure is predicted to continue until G19 (Fig. 6).

A notable feature of the hairpin-hinge hypothesis is that it does not require identical hairpin structures for all Tat signal peptides. Although the TatBC binding pocket could certainly be designed to coerce all signal peptides to adopt helix-hinge-disordered structures similar to that predicted for receptor-bound pre-SufI (Fig. 6 B), the high variability of predicted signal sequence secondary structures and the lack of a strict conservation for helix destabilizing residues (Figs. S6 and S8) suggest that this is unlikely. Importantly, the length of the helix after the RR-motif, and consequently, the position of the hinge, does not have to be the same for all signal peptides. Translocation using a hairpin-hinge mechanism can occur for either shallower or deeper membrane penetration depths of the signal peptide in the initial receptor-substrate complex. Note that the attachment of a BODIPY dye to the G19 hinge of pre-SufI (or the neighboring A18 or A20 residues) could certainly hinder the normal postulated hinging function of this residue, but because the signal peptide residues after this position are predicted to be disordered (Fig. 6 A), other residues can provide the necessary flexibility for unhinging of the hairpin.

The hairpin-hinge hypothesis provides a simple, yet elegant, solution for how the signal peptide can remain bound to the receptor complex for the duration of the transport cycle while simultaneously allowing mature domain movement across the membrane. We now speculate on the nature of the translocation passageway. Due to the short linker between the signal peptide hairpin and the mature domain, it is structurally impossible for translocation to occur through a preformed or independently assembled distinct channel (69,75,76) while retaining significant signal peptide binding interactions (unless the signal peptide penetrates through the walls of this channel). Instead, we propose that a translocation conduit is created in the vicinity of the signal peptide binding site by recruitment of TatA. In the case of a proteinaceous pore, the signal peptide



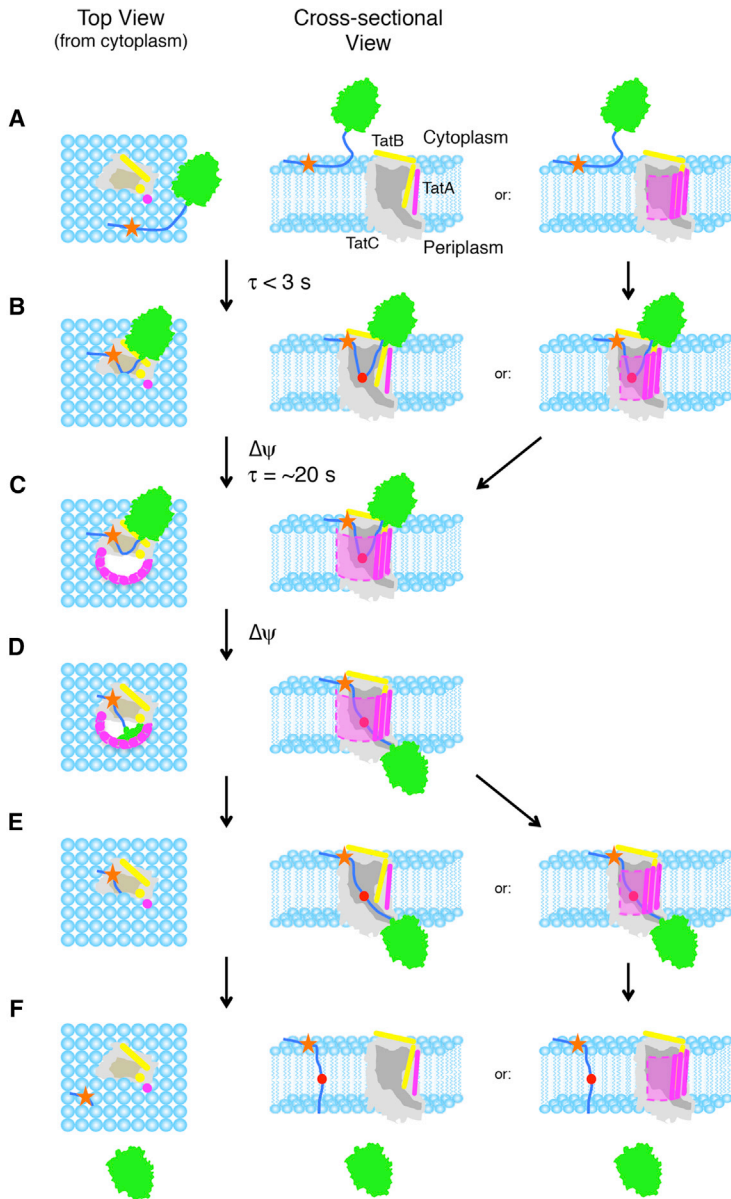

**A'** FIGURE 9 Hairpin-hinge model of Tat translocation. (A) The precursor protein (green) binds to the membrane lipids via its signal peptide (dark blue) (34,36). (B) Binding to the membrane surface, diffusion to the receptor complex, and membrane insertion of the signal peptide hairpin occurs rapidly ( $<3$  s) and is pmf-independent (29). The RR-motif (orange star) interacts with E15 and E103 of TatC (gray) (12) and the C-terminal end of the signal peptide after the hinge (red) interacts with TatB (yellow). The amphipathic helix of TatB likely contacts the mature domain (19). (C) In the presence of a transmembrane electric field gradient ( $\Delta\psi$ ), TatA (purple) is recruited to the precursor/receptor complex, resulting in formation of a translocation conduit (pink and dashed outline) with a time constant of  $\sim 20$  s (15,29). (D) Unhooking of the signal peptide hairpin allows the mature domain to translocate across the membrane. (E) The translocation conduit disintegrates after transport. When the pmf is collapsed, TatA dissociates with a time constant of  $\sim 10$  s (15). (F) The signal peptide is cleaved from the mature domain by signal peptidase and diffuses into the membrane bilayer, where it is subsequently degraded (81). (E') In a variation of this model, TatA does not completely dissociate from the receptor complex after mature domain translocation. In this scenario, the translocation conduit can be gated (sealed closed) by movement of lipids into the translocation passageway (not shown). (F') The signal peptide is released through the lateral lipid-filled gate into the membrane. (A' and B') In the presence of high precursor concentrations, recruitment of a new cargo molecule occurs before complete pore disassembly. For clarity, the cytoplasmic domains of TatA and TatB are not shown. These domains may play a role in gating the translocation channel and/or the formation of the pore itself.

binding site would line the inside of the translocation channel, and translocation could readily occur by Brownian motion due to the hinge in the signal peptide. Disassembly of the translocation pore could reset the system for another round of transport. These concepts are schematically illustrated in Fig. 9. Note that recruitment of enough TatA to sufficiently weaken the membrane seal, but insufficient to form a complete proteinaceous pore, is also possible (77,78). This is consistent with the hypothesis that TatA functions similarly to antimicrobial peptides (79,80).

The translocation mechanism proposed in Fig. 9 allows for an interesting solution to the problem of gating, which we define as the opening and closing of a translocation conduit. Recruitment of TatA to the precursor-receptor complex resulting in a pore-shaped structure does not automat-

ically produce a hole through the membrane because the lipids surrounding the original independent entities are expected to occlude any potential pore. The lipids remaining within such a pore could simply diffuse away from the membrane, or, more likely, escape laterally into the membrane bilayer as the pore nears completion. A lateral escape route for the lipids blocking the translocation channel implies that pore gating could be accomplished by controlling the escape and reentry of the lipids. Thus, the translocation channel could close without complete disassembly of the translocation complex after each substrate is transported (see variation to the model in Fig. 9). In this way, multiple translocation events could occur per assembly cycle, with the signal peptide leaving through the same gate used by the lipids after each cycle. This mechanism is consistent



with recent *in vivo* observations in which translocation complexes remained intact as long as precursor and pmf were present (15). This lipid-gating concept is conceptually similar to the membrane-weakening hypothesis (77,78). These intact translocation complexes would therefore be “active” translocators, in contrast with the TatBC oligomers observed in the absence of a pmf, which may be more appropriately termed “resting” configurations. Although these concepts require further testing, the hairpin-hinge hypothesis provides a framework to build on to test these ideas.

## SUPPORTING MATERIAL

Eleven figures and one table are available at [http://www.biophysj.org/biophysj/supplemental/S0006-3495\(17\)31091-3](http://www.biophysj.org/biophysj/supplemental/S0006-3495(17)31091-3).

## AUTHOR CONTRIBUTIONS

S.H. and S.M.M. designed research. S.H., U.K.B., and S.M.M. developed methods. S.H. and T.S.A. performed research. S.H., T.S.A., and S.M.M. analyzed data, and S.H., T.S.A., and S.M.M. wrote the manuscript.

## ACKNOWLEDGMENTS

We thank T. L. Yahr for pET-Sufl, pTatABC and antibodies to TatA, TatB, and TatC; M. Mueller for antibodies to TatC; T. Palmer for MC4100(DE3) and MC4100ΔTatABCDE; and J. Wiktorowicz, X. Luo, and the Mass Spectrometry Core in the University of Texas Medical Branch Biomolecular Resource Facility for mass spectrometry.

This research was supported by the National Institutes of Health (NIH) (under GM065534 and GM116995 to S.M.M.) and the Welch Foundation (under BE-1541 to S.M.M.).

## REFERENCES

- Santini, C. L., B. Ize, ..., L. F. Wu. 1998. A novel Sec-independent periplasmic protein translocation pathway in *Escherichia coli*. *EMBO J.* 17:101–112.
- Cline, K., W. F. Ettinger, and S. M. Theg. 1992. Protein-specific energy requirements for protein transport across or into thylakoid membranes. Two luminal proteins are transported in the absence of ATP. *J. Biol. Chem.* 267:2688–2696.
- Palmer, T., and B. C. Berks. 2012. The twin-arginine translocation (Tat) protein export pathway. *Nat. Rev. Microbiol.* 10:483–496.
- Berks, B. C. 2015. The twin-arginine protein translocation pathway. *Annu. Rev. Biochem.* 84:843–864.
- Bageshwar, U. K., and S. M. Musser. 2007. Two electrical potential-dependent steps are required for transport by the *Escherichia coli* Tat machinery. *J. Cell Biol.* 179:87–99.
- Braun, N. A., A. W. Davis, and S. M. Theg. 2007. The chloroplast Tat pathway utilizes the transmembrane electric potential as an energy source. *Biophys. J.* 93:1993–1998.
- Berks, B. C. 1996. A common export pathway for proteins binding complex redox cofactors? *Mol. Microbiol.* 22:393–404.
- Sargent, F., E. G. Bogsch, ..., T. Palmer. 1998. Overlapping functions of components of a bacterial Sec-independent protein export pathway. *EMBO J.* 17:3640–3650.
- Mould, R. M., and C. Robinson. 1991. A proton gradient is required for the transport of two luminal oxygen-evolving proteins across the thylakoid membrane. *J. Biol. Chem.* 266:12189–12193.
- Berks, B. C., T. Palmer, and F. Sargent. 2003. The Tat protein translocation pathway and its role in microbial physiology. *Adv. Microb. Physiol.* 47:187–254.
- Ramasamy, S., R. Abrol, ..., W. M. J. Clemons, Jr. 2013. The glove-like structure of the conserved membrane protein TatC provides insight into signal sequence recognition in twin-arginine translocation. *Structure.* 21:777–788.
- Rollauer, S. E., M. J. Tarry, ..., S. M. Lea. 2012. Structure of the TatC core of the twin-arginine protein transport system. *Nature.* 492:210–214.
- Celedon, J. M., and K. Cline. 2012. Stoichiometry for binding and transport by the twin arginine translocation system. *J. Cell Biol.* 197:523–534.
- Cline, K., and H. Mori. 2001. Thylakoid ΔpH-dependent precursor proteins bind to a cpTatC-Hcf106 complex before Tha4-dependent transport. *J. Cell Biol.* 154:719–729.
- Alcock, F., M. A. B. Baker, ..., B. C. Berks. 2013. Live cell imaging shows reversible assembly of the TatA component of the twin-arginine protein transport system. *Proc. Natl. Acad. Sci. USA.* 110:E3650–E3659.
- Alami, M., I. Lüke, ..., M. Müller. 2003. Differential interactions between a twin-arginine signal peptide and its translocase in *Escherichia coli*. *Mol. Cell.* 12:937–946.
- Gérard, F., and K. Cline. 2006. Efficient twin arginine translocation (Tat) pathway transport of a precursor protein covalently anchored to its initial cpTatC binding site. *J. Biol. Chem.* 281:6130–6135.
- Fröbel, J., P. Rose, ..., M. Müller. 2012. Transmembrane insertion of twin-arginine signal peptides is driven by TatC and regulated by TatB. *Nat. Commun.* 3:1311.
- Maurer, C., S. Panahandeh, ..., M. Müller. 2010. TatB functions as an oligomeric binding site for folded Tat precursor proteins. *Mol. Biol. Cell.* 21:4151–4161.
- McDevitt, C. A., G. Buchanan, ..., B. C. Berks. 2006. Subunit composition and *in vivo* substrate-binding characteristics of *Escherichia coli* Tat protein complexes expressed at native levels. *FEBS J.* 273:5656–5668.
- Orriss, G. L., M. J. Tarry, ..., B. C. Berks. 2007. TatBC, TatB, and TatC form structurally autonomous units within the twin arginine protein transport system of *Escherichia coli*. *FEBS Lett.* 581:4091–4097.
- Bolhuis, A., J. E. Mathers, ..., C. Robinson. 2001. TatB and TatC form a functional and structural unit of the twin-arginine translocase from *Escherichia coli*. *J. Biol. Chem.* 276:20213–20219.
- Maldonado, B., G. Buchanan, ..., T. Palmer. 2011. Genetic evidence for a TatC dimer at the core of the *Escherichia coli* twin arginine (Tat) protein translocase. *J. Mol. Microbiol. Biotechnol.* 20:168–175.
- Aldridge, C., X. Ma, ..., K. Cline. 2014. Substrate-gated docking of pore subunit Tha4 in the TatC cavity initiates Tat translocase assembly. *J. Cell Biol.* 205:51–65.
- Blümmel, A. S., L. A. Haag, ..., J. Fröbel. 2015. Initial assembly steps of a translocase for folded proteins. *Nat. Commun.* 6:7234.
- Alcock, F., P. J. Stansfeld, ..., B. C. Berks. 2016. Assembling the Tat protein translocase. *eLife.* 5:e20718.
- Tarry, M. J., E. Schäfer, ..., B. C. Berks. 2009. Structural analysis of substrate binding by the TatBC component of the twin-arginine protein transport system. *Proc. Natl. Acad. Sci. USA.* 106:13284–13289.
- Ma, X., and K. Cline. 2010. Multiple precursor proteins bind individual Tat receptor complexes and are collectively transported. *EMBO J.* 29:1477–1488.
- Whitaker, N., U. K. Bageshwar, and S. M. Musser. 2012. Kinetics of precursor interactions with the bacterial Tat translocase detected by real-time FRET. *J. Biol. Chem.* 287:11252–11260.

30. Zoufaly, S., J. Fröbel, ..., M. Müller. 2012. Mapping precursor-binding site on TatC subunit of twin arginine-specific protein translocase by site-specific photo cross-linking. *J. Biol. Chem.* 287:13430–13441.
31. Ma, X., and K. Cline. 2013. Mapping the signal peptide binding and oligomer contact sites of the core subunit of the pea twin arginine protein translocase. *Plant Cell.* 25:999–1015.
32. Gohlke, U., L. Pullan, ..., B. C. Berks. 2005. The TatA component of the twin-arginine protein transport system forms channel complexes of variable diameter. *Proc. Natl. Acad. Sci. USA.* 102:10482–10486.
33. Sargent, F., U. Gohlke, ..., B. C. Berks. 2001. Purified components of the *Escherichia coli* Tat protein transport system form a double-layered ring structure. *Eur. J. Biochem.* 268:3361–3367.
34. Musser, S. M., and S. M. Theg. 2000. Characterization of the early steps of OE17 precursor transport by the thylakoid  $\Delta$ pH/Tat machinery. *Eur. J. Biochem.* 267:2588–2598.
35. Shanmugham, A., H. W. Wong Fong Sang, ..., H. Lill. 2006. Membrane binding of twin arginine preproteins as an early step in translocation. *Biochemistry.* 45:2243–2249.
36. Bageshwar, U. K., N. Whitaker, ..., S. M. Musser. 2009. Interconvertibility of lipid- and translocon-bound forms of the bacterial Tat precursor pre-SufI. *Mol. Microbiol.* 74:209–226.
37. Klein, M. J., S. L. Grage, ..., A. S. Ulrich. 2012. Structure analysis of the membrane-bound PhoD signal peptide of the Tat translocase shows an N-terminal amphiphilic helix. *Biochim. Biophys. Acta.* 1818:3025–3031.
38. Schlesier, R., and R. B. Klösgen. 2010. Twin arginine translocation (Tat)-dependent protein transport: the passenger protein participates in the initial membrane binding step. *Biol. Chem.* 391:1411–1417.
39. Brüser, T., T. Yano, ..., F. Daldal. 2003. Membrane targeting of a folded and cofactor-containing protein. *Eur. J. Biochem.* 270:1211–1221.
40. Hou, B., S. Frielingsdorf, and R. B. Klösgen. 2006. Unassisted membrane insertion as the initial step in  $\Delta$ pH/Tat-dependent protein transport. *J. Mol. Biol.* 355:957–967.
41. Gérard, F., and K. Cline. 2007. The thylakoid proton gradient promotes an advanced stage of signal peptide binding deep within the Tat pathway receptor complex. *J. Biol. Chem.* 282:5263–5272.
42. Berks, B. C., S. M. Lea, and P. J. Stansfeld. 2014. Structural biology of Tat protein transport. *Curr. Opin. Struct. Biol.* 27:32–37.
43. Yahr, T. L., and W. T. Wickner. 2001. Functional reconstitution of bacterial Tat translocation *in vitro*. *EMBO J.* 20:2472–2479.
44. Sambrook, J., and D. W. Russell. 2001. *Molecular Cloning. A Laboratory Manual*, 3rd Ed. Cold Spring Harbor Laboratory Press, Cold Spring Harbor, NY.
45. Harlow, E. D., and D. Lane. 1999. *Using Antibodies: A Laboratory Manual*. Cold Spring Harbor Laboratory Press, Cold Spring Harbor, NY.
46. Tao, T., M. Lamkin, and C. J. Scheiner. 1985. The conformation of the C-terminal region of actin: a site-specific photocrosslinking study using benzophenone-4-maleimide. *Arch. Biochem. Biophys.* 240:627–634.
47. Wiśniewski, J. R., A. Zougman, ..., M. Mann. 2009. Universal sample preparation method for proteome analysis. *Nat. Methods.* 6:359–362.
48. Maupetit, J., P. Derreumaux, and P. Tufféry. 2010. A fast method for large-scale de novo peptide and miniprotein structure prediction. *J. Comput. Chem.* 31:726–738.
49. Jones, D. T. 1999. Protein secondary structure prediction based on position-specific scoring matrices. *J. Mol. Biol.* 292:195–202.
50. Drozdetskiy, A., C. Cole, ..., G. J. Barton. 2015. JPred4: a protein secondary structure prediction server. *Nucleic Acids Res.* 43:W389–W394.
51. Cheng, J., A. Z. Randall, ..., P. Baldi. 2005. SCRATCH: a protein structure and structural feature prediction server. *Nucleic Acids Res.* 33:W72–W76.
52. Pierce, B. G., K. Wiehe, ..., Z. Weng. 2014. ZDOCK server: interactive docking prediction of protein-protein complexes and symmetric multimers. *Bioinformatics.* 30:1771–1773.
53. Zhang, Y., L. Wang, ..., C. Jin. 2014. Solution structure of the TatB component of the twin-arginine translocation system. *Biochim. Biophys. Acta.* 1838:1881–1888.
54. Lakowicz, J. R. 2006. *Principles of Fluorescence Spectroscopy*. Springer Science+Business Media, New York.
55. Chattopadhyay, A., and E. London. 1987. Parallax method for direct measurement of membrane penetration depth utilizing fluorescence quenching by spin-labeled phospholipids. *Biochemistry.* 26:39–45.
56. Yamada, K., D. Inoue, ..., H. Utsumi. 2004. *In vivo* measurement of redox status in streptozotocin-induced diabetic rat using targeted nitroxyl probes. *Antioxid. Redox Signal.* 6:605–611.
57. Musser, S. M., R. W. Larsen, and S. I. Chan. 1993. Fluorescence quenching of reconstituted NCD-4-labeled cytochrome *c* oxidase complex by DOXYL-stearic acids. *Biophys. J.* 65:2348–2359.
58. Johnson, I. D., H. C. Kang, and R. P. Haugland. 1991. Fluorescent membrane probes incorporating dipyrrometheneboron difluoride fluorophores. *Anal. Biochem.* 198:228–237.
59. Nelson, L. D., S. Chiantia, and E. London. 2010. Perfringolysin O association with ordered lipid domains: implications for transmembrane protein raft affinity. *Biophys. J.* 99:3255–3263.
60. Fröbel, J., P. Rose, and M. Müller. 2011. Early contacts between substrate proteins and TatA translocase component in twin-arginine translocation. *J. Biol. Chem.* 286:43679–43689.
61. Oates, J., C. M. Barrett, ..., C. Robinson. 2005. The *Escherichia coli* twin-arginine translocation apparatus incorporates a distinct form of TatABC complex, spectrum of modular TatA complexes and minor TatAB complex. *J. Mol. Biol.* 346:295–305.
62. Fincher, V., M. McCaffery, and K. Cline. 1998. Evidence for a loop mechanism of protein transport by the thylakoid  $\Delta$ pH pathway. *FEBS Lett.* 423:66–70.
63. Kaderbhai, N. N., V. Harding, and M. A. Kaderbhai. 2008. Signal peptidase I-mediated processing of an engineered mammalian cytochrome *b5* precursor is an exocytosolic post-translocational event in *Escherichia coli*. *Mol. Membr. Biol.* 25:388–399.
64. Lüke, I., J. I. Handford, ..., F. Sargent. 2009. Proteolytic processing of *Escherichia coli* twin-arginine signal peptides by LepB. *Arch. Microbiol.* 191:919–925.
65. San Millan, J. L., D. Boyd, ..., J. Beckwith. 1989. Use of *phoA* fusions to study the topology of the *Escherichia coli* inner membrane protein leader peptidase. *J. Bacteriol.* 171:5536–5541.
66. Pace, C. N., and J. M. Scholtz. 1998. A helix propensity scale based on experimental studies of peptides and proteins. *Biophys. J.* 75:422–427.
67. Giron-Monzon, L., L. Manelyte, ..., P. Friedhoff. 2004. Mapping protein-protein interactions between MutL and MutH by cross-linking. *J. Biol. Chem.* 279:49338–49345.
68. Musser, S. M., and S. M. Theg. 2000. Proton transfer limits protein translocation rate by the thylakoid  $\Delta$ pH/Tat machinery. *Biochemistry.* 39:8228–8233.
69. Mori, H., and K. Cline. 2002. A twin arginine signal peptide and the pH gradient trigger reversible assembly of the thylakoid  $[\Delta]$ pH/Tat translocase. *J. Cell Biol.* 157:205–210.
70. Lausberg, F., S. Fleckenstein, ..., R. Freudl. 2012. Genetic evidence for a tight cooperation of TatB and TatC during productive recognition of twin-arginine (Tat) signal peptides in *Escherichia coli*. *PLoS One.* 7:e39867.
71. de Leeuw, E., T. Granjon, ..., B. C. Berks. 2002. Oligomeric properties and signal peptide binding by *Escherichia coli* Tat protein transport complexes. *J. Mol. Biol.* 322:1135–1146.
72. Eimer, E., J. Fröbel, ..., M. Müller. 2015. TatE as a regular constituent of bacterial twin-arginine protein translocases. *J. Biol. Chem.* 290:29281–29289.
73. Deseke, E., Y. Nakatani, and G. Ourisson. 1998. Intrinsic reactivities of amino acids towards photoalkylation with benzophenone—a study

- preliminary to photolabelling of the transmembrane protein Glycophorin A. *Eur. J. Org. Chem.* 1998:243–251.
74. Lewis, P. N., N. Go, ..., H. A. Scheraga. 1970. Helix probability profiles of denatured proteins and their correlation with native structures. *Proc. Natl. Acad. Sci. USA.* 65:810–815.
  75. Dabney-Smith, C., and K. Cline. 2009. Clustering of C-terminal stromal domains of Tha4 homo-oligomers during translocation by the Tat protein transport system. *Mol. Biol. Cell.* 20:2060–2069.
  76. Dabney-Smith, C., H. Mori, and K. Cline. 2006. Oligomers of Tha4 organize at the thylakoid Tat translocase during protein transport. *J. Biol. Chem.* 281:5476–5483.
  77. Brüser, T., and C. Sanders. 2003. An alternative model of the twin arginine translocation system. *Microbiol. Res.* 158:7–17.
  78. Rodriguez, F., S. L. Rouse, ..., J. R. Schnell. 2013. Structural model for the protein-translocating element of the twin-arginine transport system. *Proc. Natl. Acad. Sci. USA.* 110:E1092–E1101.
  79. Aldridge, C., A. Storm, ..., C. Dabney-Smith. 2012. The chloroplast twin arginine transport (Tat) component, Tha4, undergoes conformational changes leading to Tat protein transport. *J. Biol. Chem.* 287:34752–34763.
  80. Chan, C. S., M. R. Zlomislic, ..., R. J. Turner. 2007. The TatA subunit of *Escherichia coli* twin-arginine translocase has an N in topology. *Biochemistry.* 46:7396–7404.
  81. Hussain, M., Y. Ozawa, ..., S. Mizushima. 1982. Signal peptide digestion in *Escherichia coli*. Effect of protease inhibitors on hydrolysis of the cleaved signal peptide of the major outer-membrane lipoprotein. *Eur. J. Biochem.* 129:233–239.

**Biophysical Journal, Volume 113**

**Supplemental Information**

**A Hinged Signal Peptide Hairpin Enables Tat-Dependent Protein Translocation**

**Shruthi Hamsanathan, Tamil S. Anthonymuthu, Umesh K. Bageshwar, and Siegfried M. Musser**



**Table S1: Primers Used to Generate Mutants**

| <b>Plasmid/Mutant</b> | <b>Forward Primer (5' -&gt; 3')</b>     | <b>Reverse Primer (5' -&gt; 3')</b>     |
|-----------------------|-----------------------------------------|-----------------------------------------|
| pSufI - S2C           | ATA CAT ATG TGT CTC AGT CGG             | ATC TCC TTC TTA AAG TTA AAC AA          |
| pSufI - F8C           | GGC GTC AGT GTA TTC AGG C               | GAC TGA GTG ACA TAT GTA TAT             |
| pSufI - I9C           | CGG CGT CAG TTC TGT CAG GCA TCG GGG     | ACT GAG TGA CAT ATG TAT ATC TCC TTC     |
| pSufI - Q10C          | ATT GCA CTT ATT GCA GGC GCT             | CCC CGA TGC ACA AAT GAA CTG             |
| pSufI - A11C          | GCA CTT ATT GCA GGC GCT GTT             | AAT CCC CGA ACA CTG AAT GAA             |
| pSufI - S12C          | TTC ATT CAG GCA TGT GGG ATT GCA CTT     | CTG ACG CCG ACT GAG TGA CAT ATG TAT     |
| pSufI - G13C          | CAG GCA TCG TGT ATT GCA CTT             | AAT GAA CTG ACG CCG ACT GAG             |
| pSufI - I14C          | TGC AGG CGC TGT TCC CCT G               | ATA AGT GCA CAC CCC GAT G               |
| pSufI - A15C          | TCG GGG ATT TGT CTT ATT GCA             | TGC CTG AAT GAA CTG ACG CCG             |
| pSufI - L16C          | GGG ATT GCA TGT ATT GCA GGC             | CGA TGC CTG AAT GAA CTG ACG             |
| pSufI - A18C          | GCA CTT ATT TGT GGC GCT GTT             | AAT CCC CGA TGC CTG AAT GAA             |
| pSufI - G19C          | CTT ATT GCA TGT GCT GTT CCC             | TGC AAT CCC CGA TGC CTG AAT             |
| pSufI - A20C          | CTT ATT GCA GGC TGT GTT CCC CTG AAG     | TGC AAT CCC CGA TGC CTG AAT GAA CTG     |
| pSufI - V21C          | GCA GGC GCT TGT CCC CTG AAG             | AAT AAG TGC AAT CCC CGA TGC C           |
| pSufI - L23C          | GCT GTT CCC TGT AAG GCG AGC             | GCC TGC AAT AAG TGC AAT CCC C           |
| pSufI - A25C          | CCC CTG AAG TGT AGC GCA GCC             | AAC AGC GCC TGC AAT AAG TGC AA          |
| pSufI - A27C          | CAA CCG CTA CAG CAA CCG CTA CCC GTT     | CTG TTG CCC GGC ACA GCT GGC CTT CAG     |
| pSufI - Q30C          | GCA GCC GGG TGT CAG CAA CCG CTA         | TAG CGG TTG CTG ACA CCC GGC TGC         |
| pSufI - P33C          | GCC GGG CAA CAG CAA TGT CTA CCC GTT CCG | CGG AAC GGG TAG ACA TTG CTG TTG CCC GGC |
| pSufI - V36C          | AGC AAC CGC TAC CCT GTC CGC CGC TGC TTG | CAA GCA GCG GCG GAC AGG GTA GCG GTT GCT |
| pSufI - R44C          | TGC TTG AAT CTC GCT GTG GGC AAC CGC TG  | CAG CGG TTG CCC ACA GCG AGA TTC AAG CA  |
| pSufI - F49C          | GGG CAA CCG CTG TGT ATG ACT GTA CAA CG  | CGT TGT ACA GTC ATA CAC AGC GGT TGC CC  |
| pSufI - M338C         | AGT CTT CCG TGT CGC TTG CTG             | GTC TGT GAC CAG CGG CAG AAG             |
| pSufI - W441C         | GAA GTG CGC ACA GGA AGG CTG             | CCG TTC TAC TTC AAC AGT CAG AC          |
| pSufI - Q31C          | CCC GTT CCG CCG CTG CTT GA              | TAG CGG TTG ACA TTG CCC GGC             |
| pSufI - Y221C         | CAA AGC CCG TGT GTT GAA GTC             | TAC ACC GTT AAC CAG CAG CGT             |
| pSufI - 12C/25C       | CCC CTG AAG TGT AGC GCA GCC             | AAC AGC GCC TGC AAT AAG TGC AA          |
| pTatAC                | ATG TCT GTA GAA GAT ACT                 | GTT TAC ACC TGC TCT TTA                 |
| pTatBC                | ATG TTT GAT ATC GGT TTT                 | TAT ACG TTA CAC GGC CAT                 |
| pTatC                 | ATG TCT GTA GAA GAT ACT                 | TAT ACG TTA CAC GGC CAT                 |
| pSufI KK              | ACT CAG TAA GAA ACA GTT CAT TC          | GAC ATA TGT ATA TCT CCT TCT TA          |

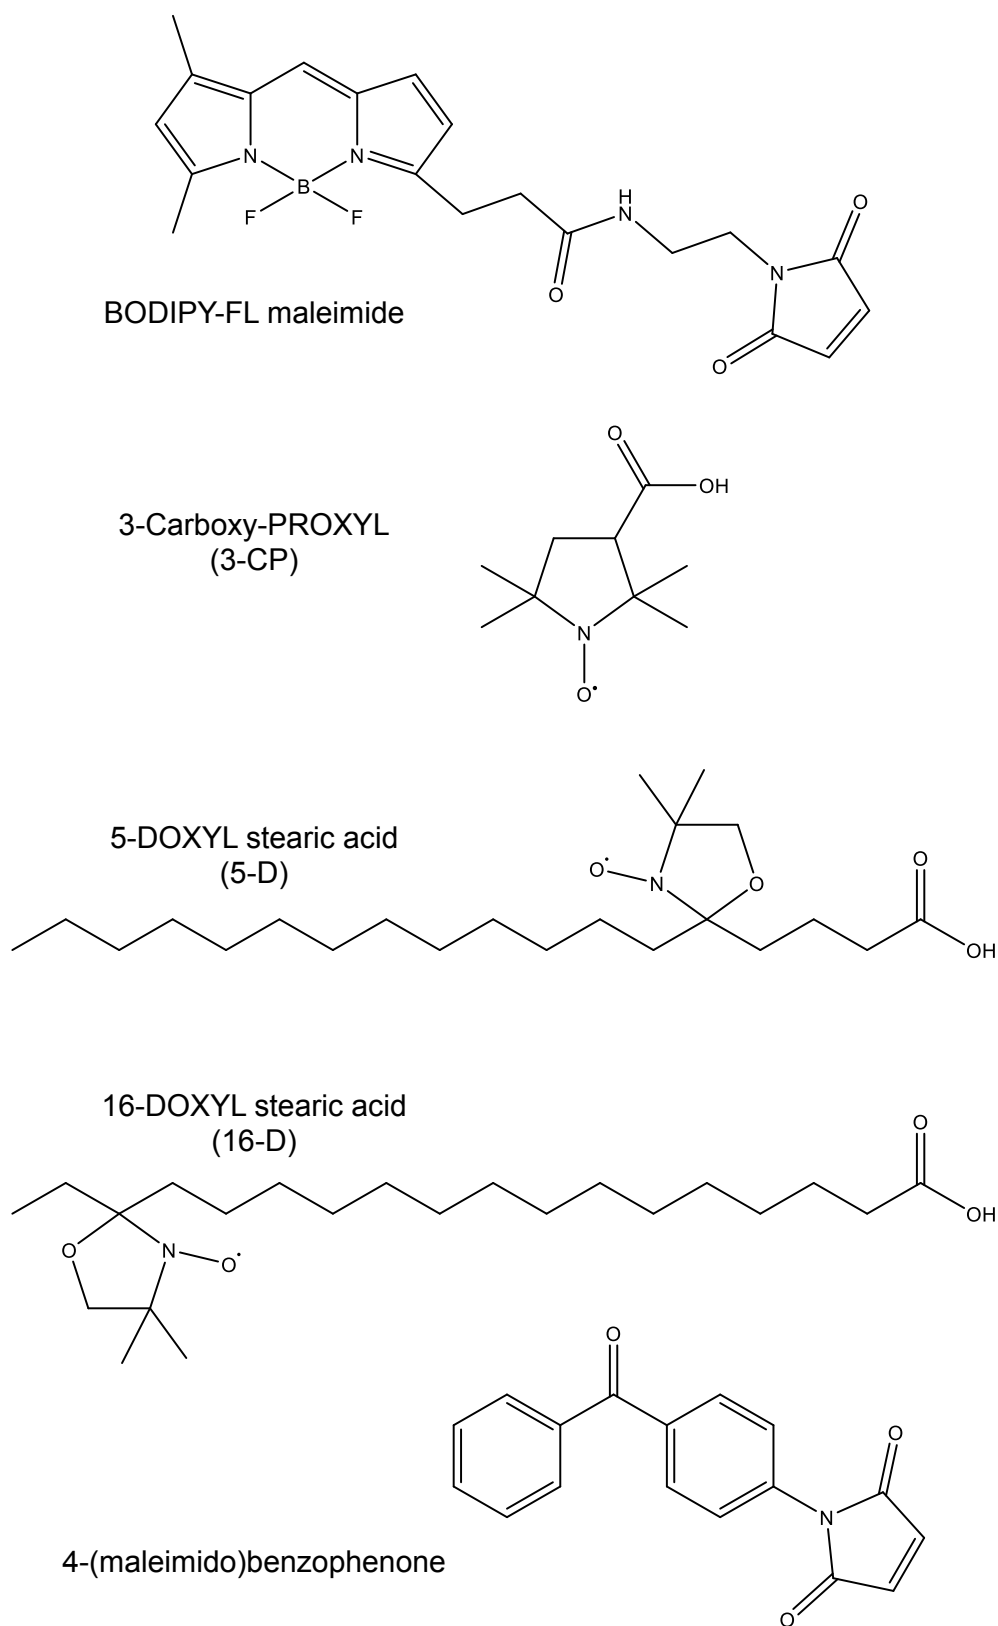

**Figure S1. Structures of the BODIPY-FL Cysteine-reactive Fluorescent Probe, the Nitroxide Quenchers, and the Photocrosslinker used in this Study.**

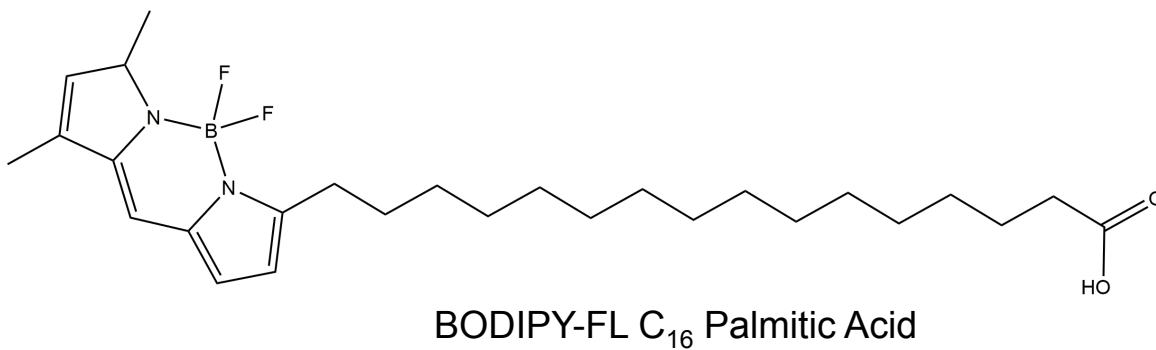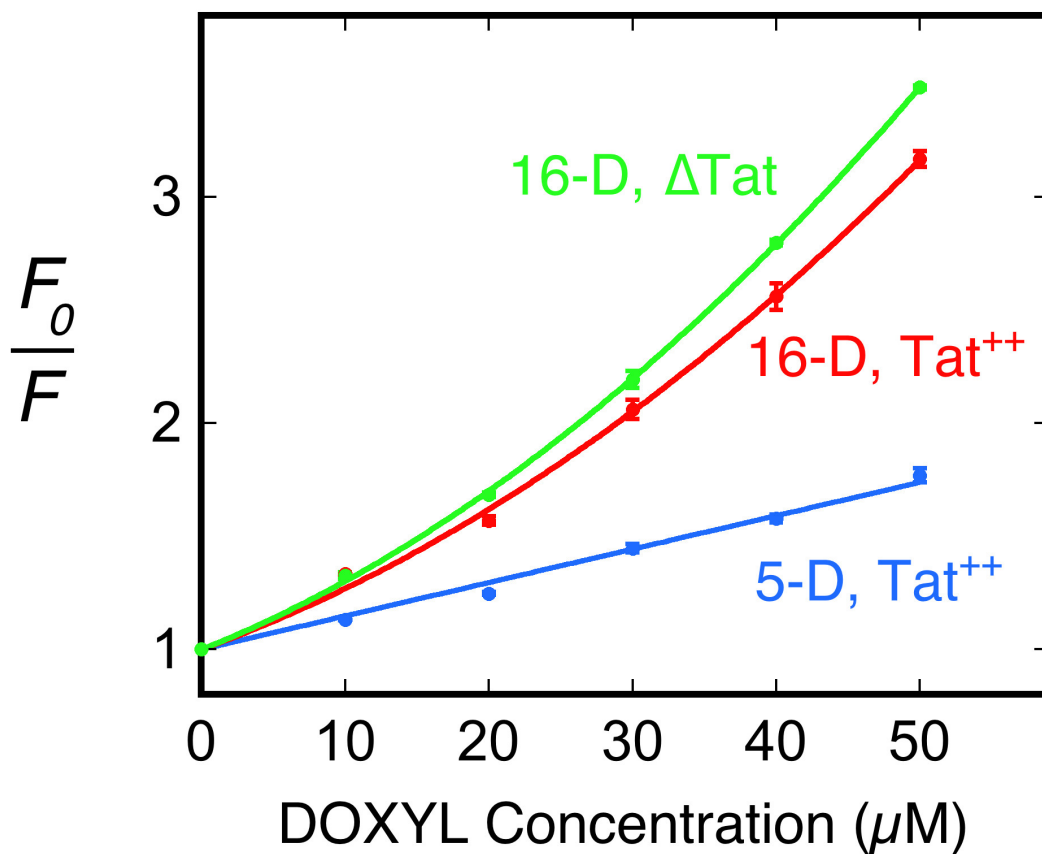

**Figure S2. Stern-Volmer Quenching of BODIPY-FL at the C<sub>16</sub> Position of Palmitic Acid Incorporated into ΔTat and Tat<sup>++</sup> IMVs.** Quenching was performed as in Figure 2. The data were fit to a first (5-D) or second (16-D) degree polynomial.

A

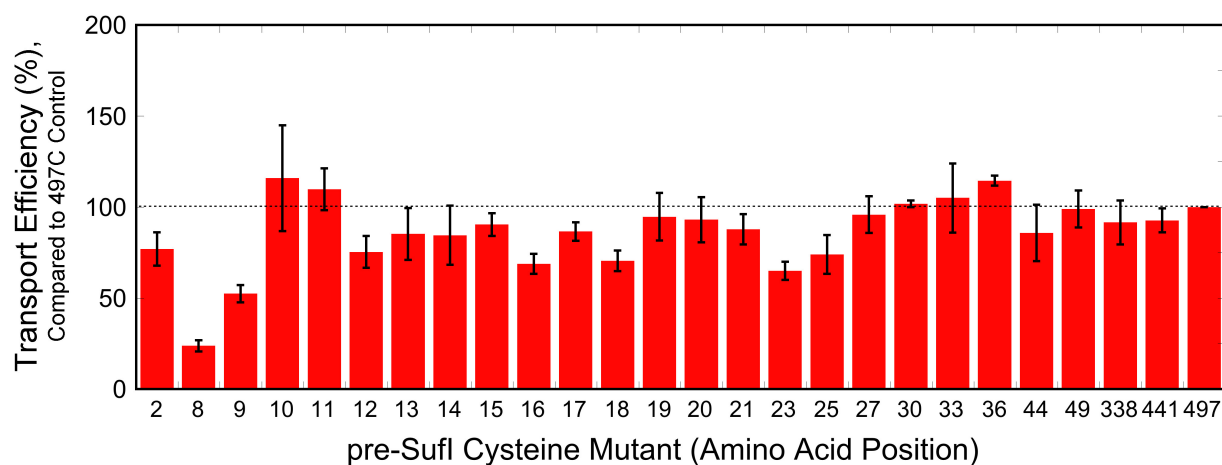

B

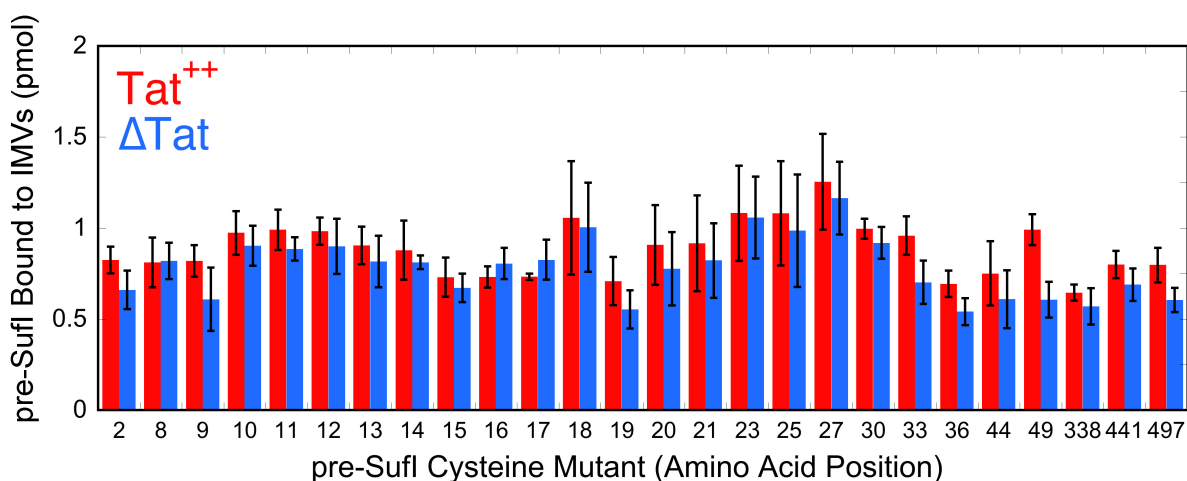

### Figure S3. Transport Efficiencies and Membrane Binding of pre-SufI Mutants

**(A) *In vitro* Tat Transport Efficiencies for BODIPY-labeled Single Cysteine pre-SufI Mutants.** Transport assays were performed by incubating BODIPY-labeled pre-SufI (90 nM) with Tat<sup>++</sup> inverted membrane vesicles (from *E. coli* strain MC4100 overproducing TatABC;  $A_{280} = 5$ ). A pmf was generated by addition of NADH (4 mM), and samples were incubated at 37°C for 30 minutes. Untransported protein was digested with proteinase K (0.73 mg/mL for 40 min). Samples were then analyzed by SDS-PAGE, and immunoblotted with SufI antibodies. Most mutants yielded transport efficiencies of ~80-120%, indicating little effect of the mutation and/or dye label. Notable exceptions are the F8C and I9C mutants, which had transport efficiencies of ~20% and ~50%, respectively, likely because of these residues' proximity to the RR-motif.

**(B) Membrane Binding of pre-SufI Single Cysteine Mutants.** Membrane binding was performed by incubating BODIPY-labeled pre-SufI mutants (90 nM; 3.2 pmol) with ΔTat or Tat<sup>++</sup> IMVs ( $A_{280} = 2$ ) at 37°C for 10 min. IMVs were sedimented (16,200 x *g* for 30 min), and analyzed by SDS-PAGE and immunoblotting with anti-SufI antibodies using



pre-Sufl concentration standards ( $N = 3$ ). These data indicate that the labeled pre-Sufl mutants bind to Tat-deficient and Tat-containing membranes. However, differences in membrane surface composition and properties can lead to different quantities of lipid-bound precursor under the two conditions. Tat-deficient cells are phenotypically different (chainy phenotype) (1) due to cell division defects, suggesting that differences in IMV properties can be expected. More importantly, the IMV concentration assay is based on an absorbance reading (at 280 nm in 2% SDS), which is highly dependent on the total protein concentration and purity of the IMV preparation. Thus, calculation of the translocon-bound fraction from these data is considered unreliable. The  $\alpha$  values determined by our fluorescence approach (Figure S3) are not influenced by these issues.

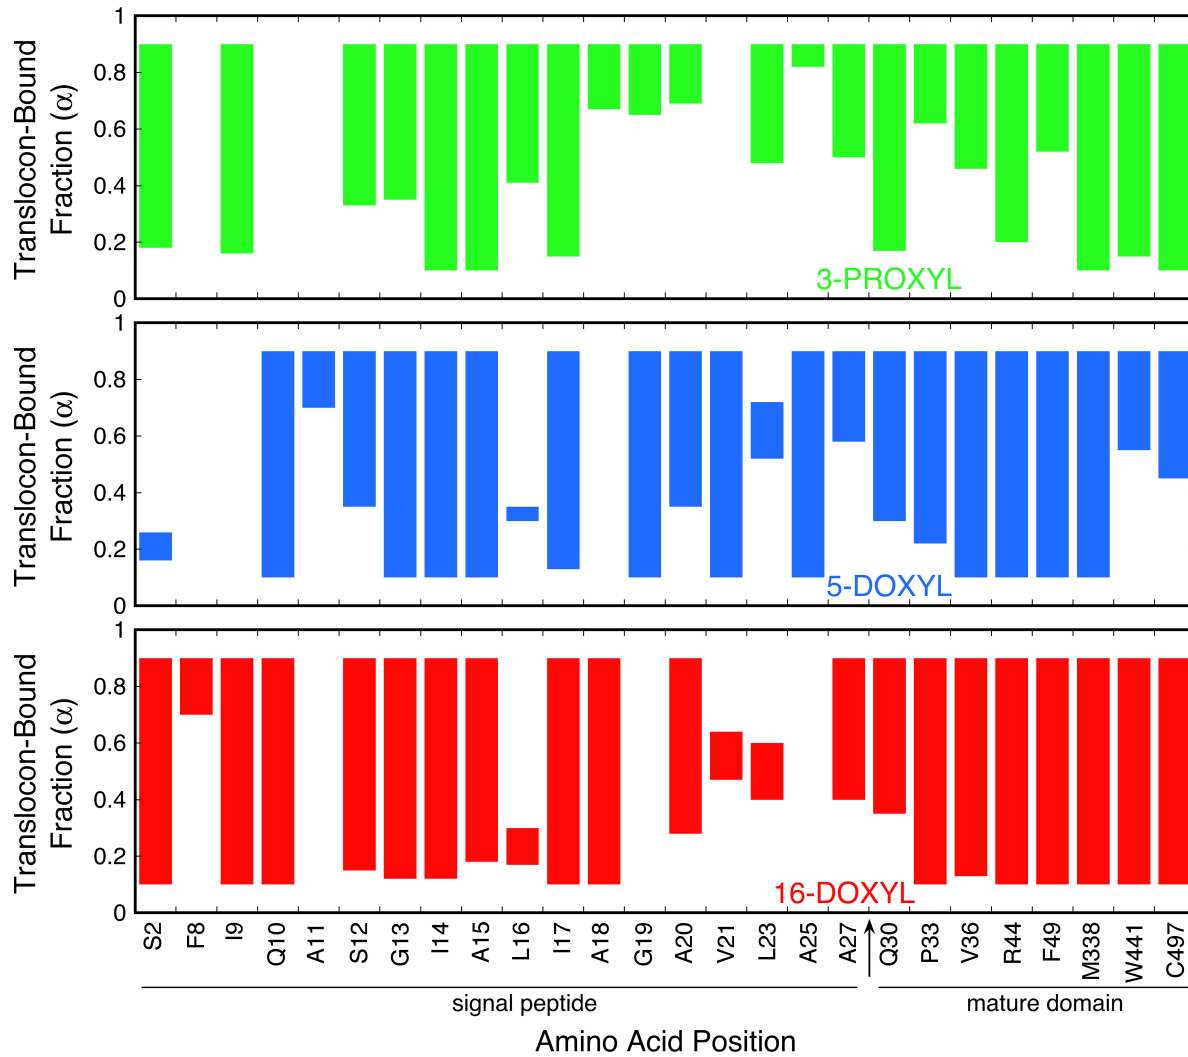

**Figure S4. Uncertainty in the  $\alpha$  Values for Lipid- and Translocon-Bound pre-SufI.** Bars indicate the largest and smallest  $\alpha$  values consistent with the fluorescence quenching data (Figures 2 & 3). The translocon-bound fraction ( $\alpha$ ) was frequently poorly constrained by the data (wide ranges), often because the quenching observed under  $\Delta$ Tat and Tat<sup>++</sup> conditions was very similar. Comparison of more constrained  $\alpha$  values (narrow ranges) reveals that  $\alpha$  covered virtually the entire range from 0.1-0.9, suggesting that the various labeled mutants indeed had different lipid and translocon binding affinities. For conditions yielding unreliable  $K_D$  values (see Figure 3),  $\alpha$  was not determined (blank).

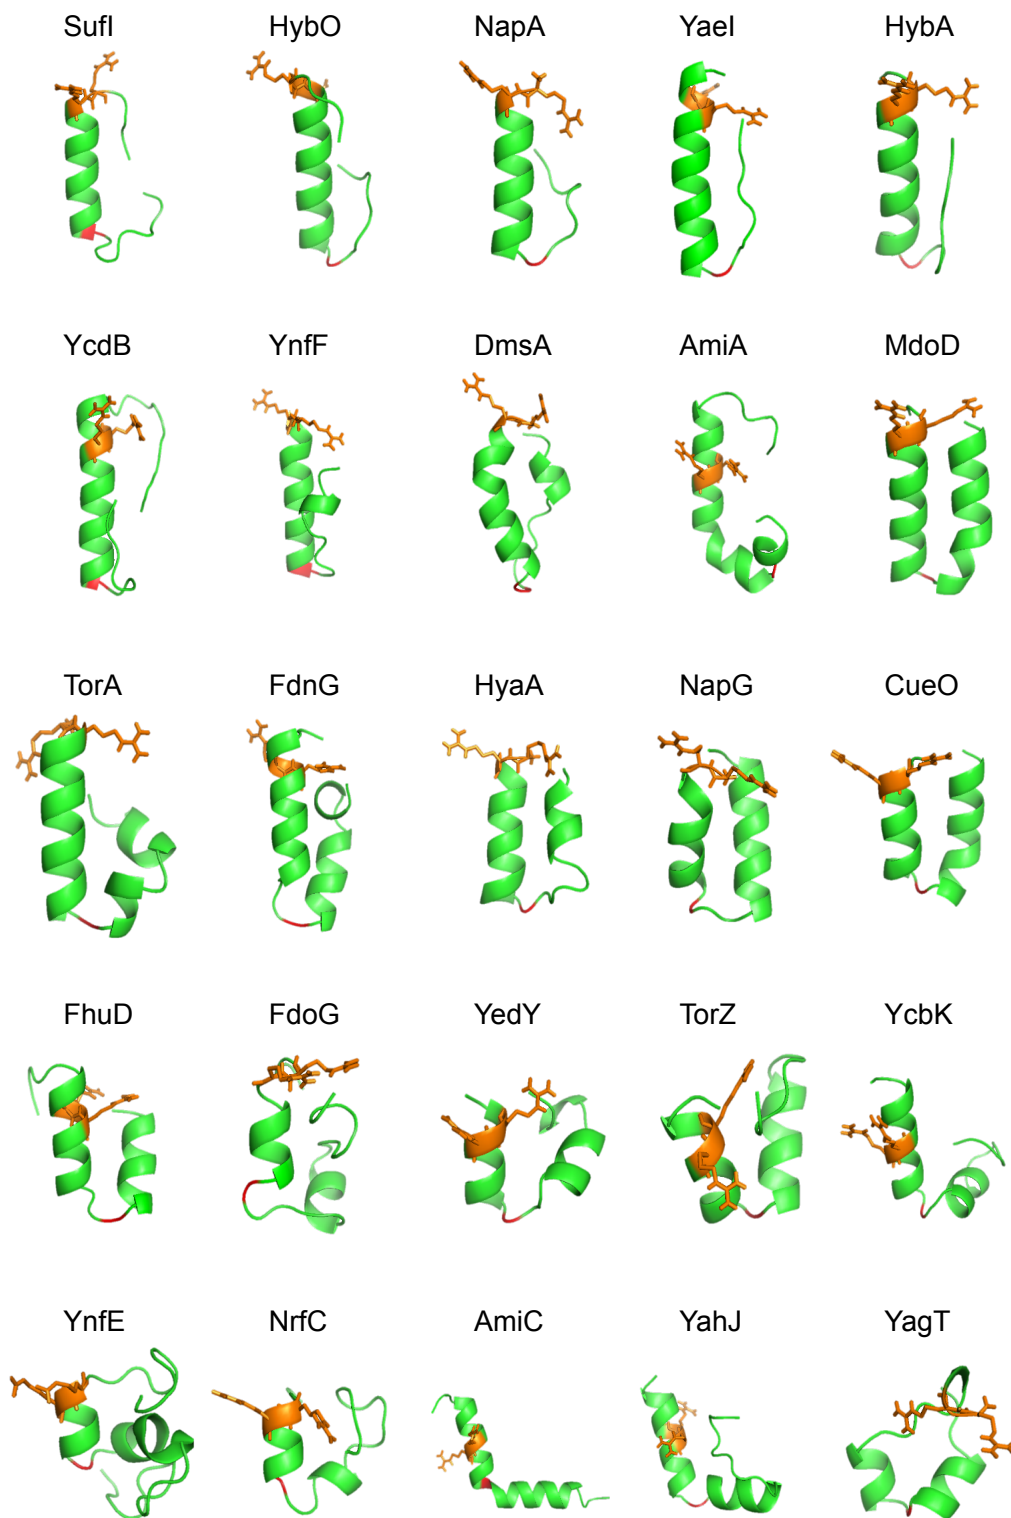

**Figure S5. Predicted Secondary Structures of the Signal Peptides from 25 *E. coli* Tat Substrates.** Secondary structures were generated as for pre-SufI in Figure 6A. The RR-motif is orange. The residue at the end of the first helical region (red) is typically glycine (see (B)). The predicted structure for NapA shown here is consistent with its NMR solution structure (PDB ID: 2PQ4).

SufI MSLSRRQFIQASGIALCAGAVPLKASA  
 HybO MTGDNTLIHSHGINRRDFMKLCAALATMGLSSKAAA  
 NapA MKLSRRSEFMKANAVAAAAAAGLSVPGVA  
 YaeI MISRRRFLQATAATIATSSGFGYMHYC  
 HybA MNRRNFKAASCALLTGALPSVSHA  
 YcdB MQYKDENGVNEPSRRLLKVICALALAGSCPVAHA  
 YnfF MMKIHTTEALMKAEISRRSLMKTSALGSLALASSAFTLPFSQMVRA  
 DmsA MKTKIPDAVLAAEVSRRGLVKTTAIGGLAMASSALTLPFSRIAHA  
 AmiA MSTFKPLKTLTSRRQVLKAGLAALTLSGMSQAIA  
 MdoD MDRRRFIKGSMAAAVCGTSGIASLFSQAFA  
 TorA MNNNDLFQASRRFLAQLGGLTVAGMIGPSLLTPRRATAAQA  
 FdnG MDVSRROFFKICAGGMAGTTVAALGFAPKQALA  
 HyaA MNNEETFYQAMRRQGVTRRSFLKYCSLAATSIGLCAGMAPKIAWA  
 NapG MSRSKAPQNGRRRFLRDVVRTAGSLAAVGVALLGLOQQTARA  
 CueO MQRRDFLKYSVAIGVASALPLWSRAVFA  
 FhuD MSGLPLISRRLLTAMALSPLLWQMNTAHA  
 FdoG MQVSRROFFKICAGGMAGTTAAALGFAPSVALA  
 YedY MKRRQVLKALGISATALSPLHAHA  
 TorZ MTLTRREFIKHSGIAACALVVTSAAPLPAWA  
 YcbK MDKFDANRRKLLAIGVALGAAILPTPAFA  
 YnfE MSKNERMVGISRRTLVKSTAI GSLALAAGGFSLPFTLRNAAA  
 NrfC MTWSRRQFLTGVGVLAAVSCTAGRVA  
 AmiC MSGSNTAISRRLLQGACAMWLLSVSQVSLA  
 YahJ MKESNSRREFLSQSGKMVTAAALFGTSVPLAHA  
 YagT MSNQGEYPEDNRVKGHEPHDLSLTRRDLIKVSAATAVYPHSTLAASVPA

12-17

**Figure S6. Signal Peptide Sequences for 25 *E. coli* Tat Substrates.** The helix-breaking residues glycine (*green*) and proline (*red*) are identified. The residue(s) after the RR-containing helix as predicted in Figure S5 is circled in *red*, and is (are) typically glycine (20/25, 80%), or occasionally two non-aromatic hydroxyl (S or T) residues (3/25, 12%), which are weak helix-breaking residues (2). The helix destabilizing residue(s) is(are) frequently 12-17 residues after the RR-motif (*blue*), consistent with Figure 6C.



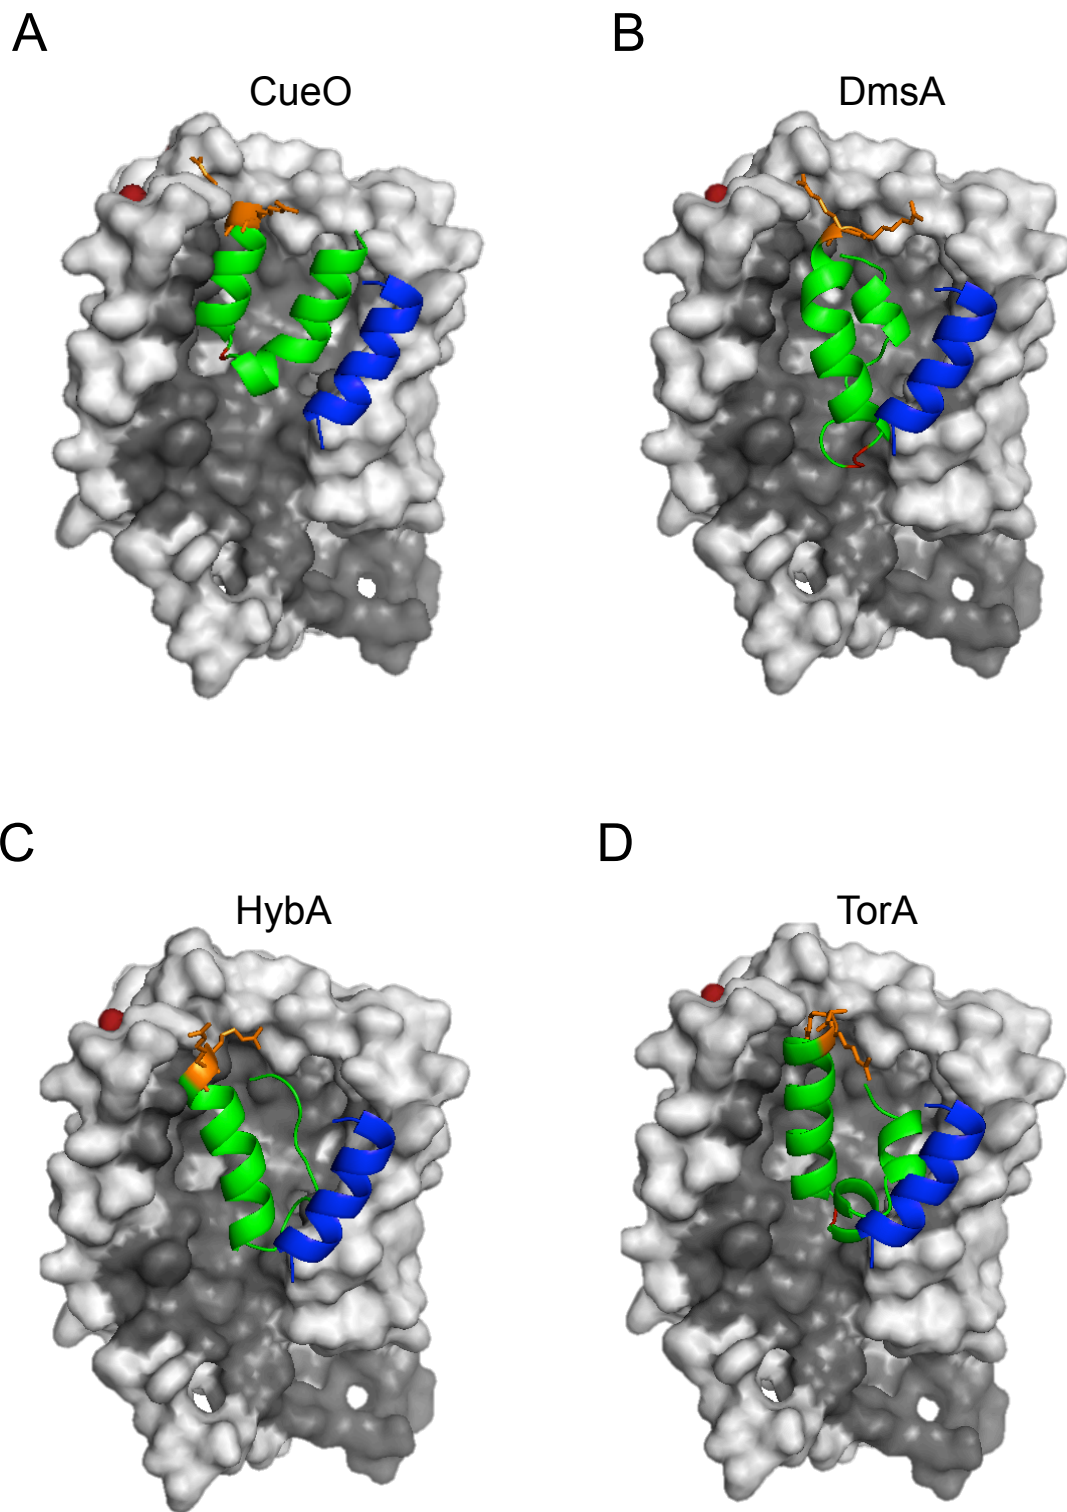

**Figure S7. Docked Structures of TatBC with Signal Peptides from Four *E. coli* Tat Substrates.** Key: RR-motif (*orange*), helix-destabilizing residue (*red*), TatC (*gray*; SWISS-MODEL ID: P69423), TatB membrane domain (*blue*), glutamic acid residues (E15 and E103 of TatC) involved in binding the RR-motif (*dark red*; more visible in the back view in Figure 6B).

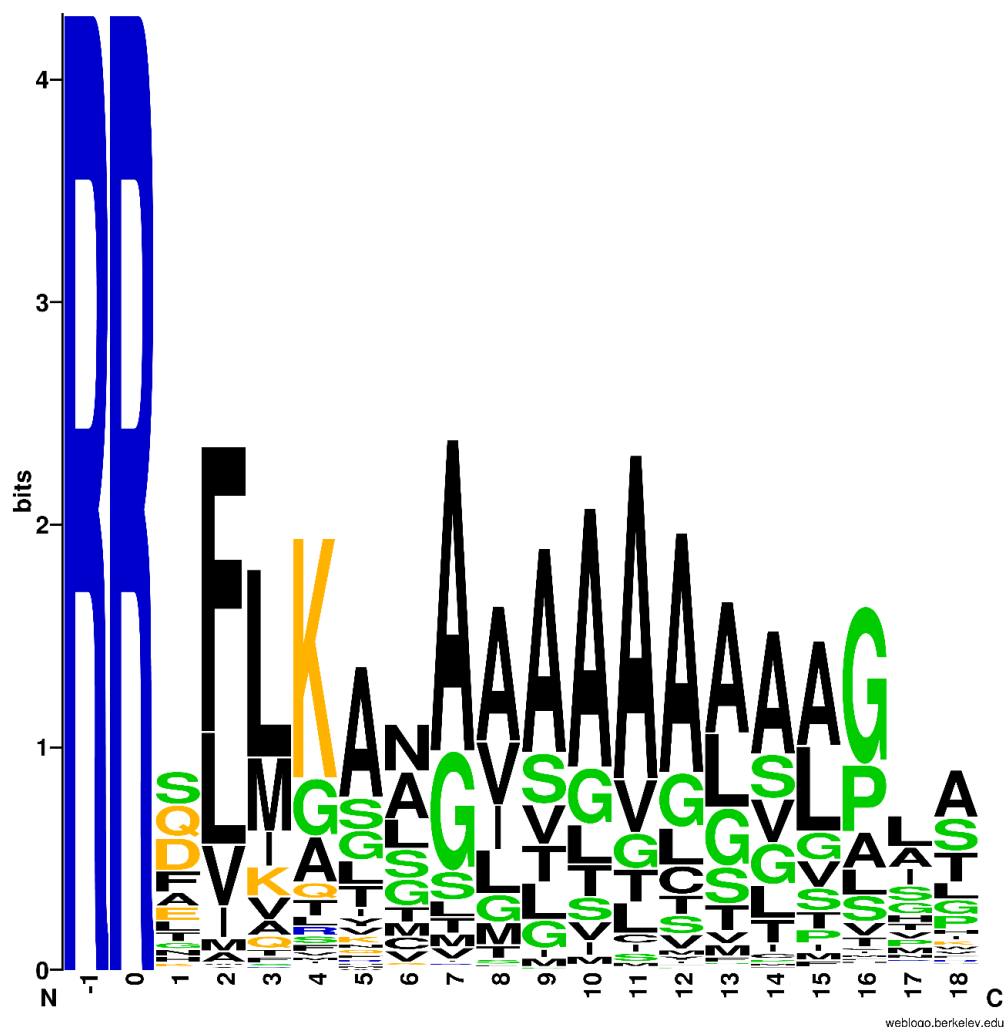

**Figure S8. Sequence Logo for the 512 Tat Signal Sequences of Figure 6C.** The RRXFLK Tat consensus motif (3, 4) is apparent (-1 to 4), as is the presence of the helix destabilizing residue glycine, which is most predominant 16 residues after the RR-motif. The sequence logo was constructed using web logo tool version 2.8.2 (<http://weblogo.berkeley.edu/logo.cgi>).

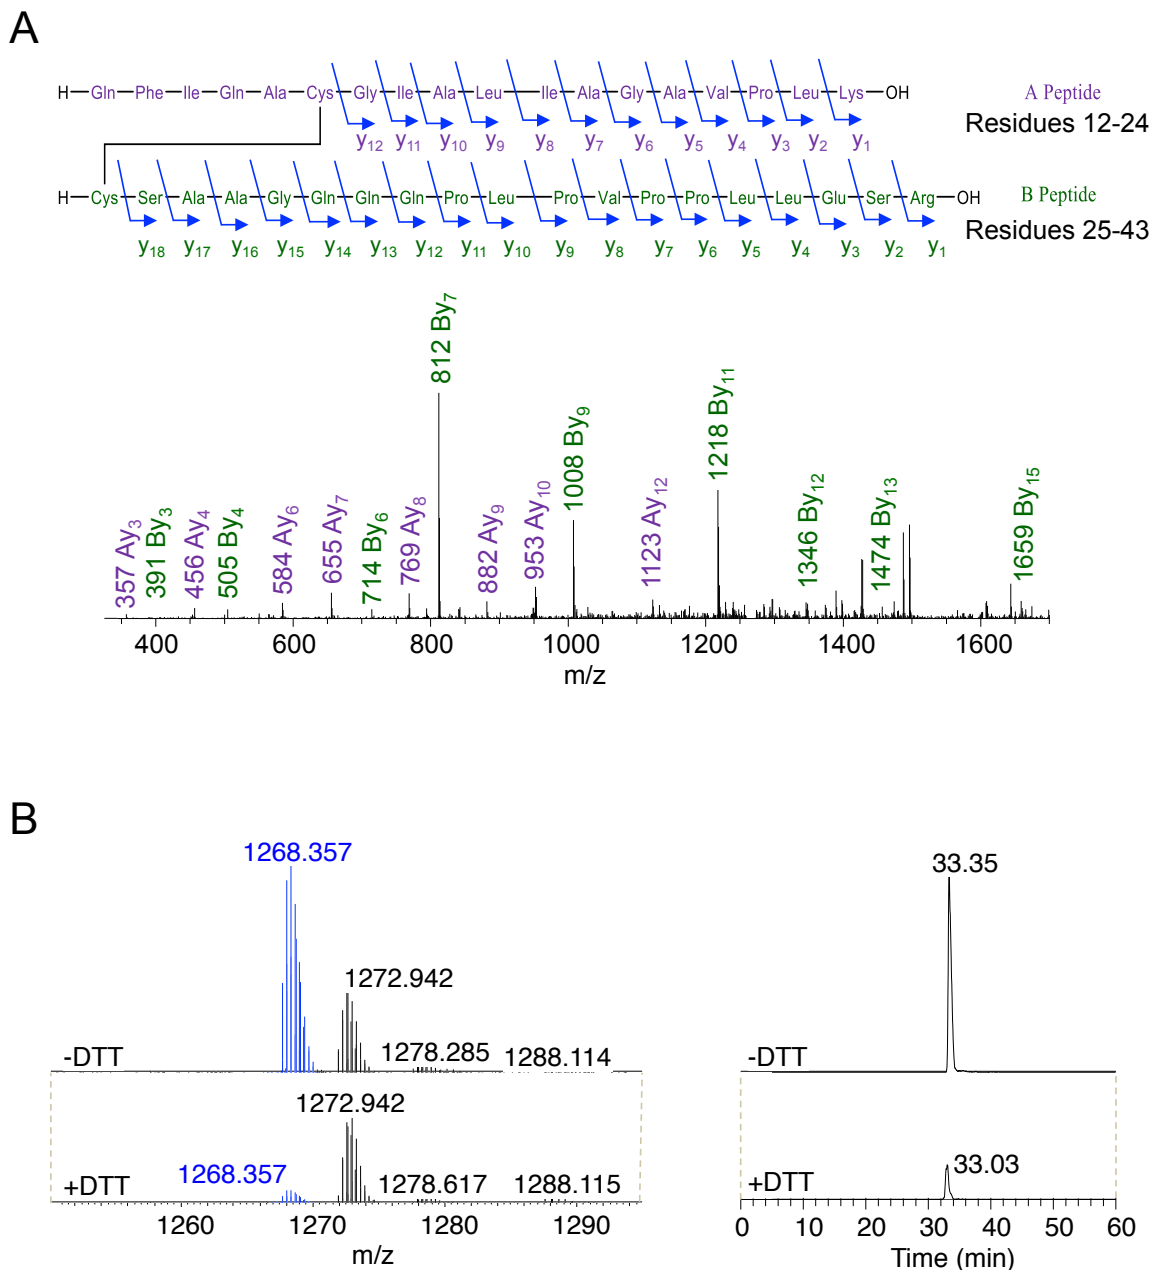

**Figure S9. Disulfide Crosslinked pre-Sufl(S12C/A25C).**

**(A) Tandem Mass Spectrometry Analysis of the Disulfide Linked Peptide Fragment of pre-Sufl(S12C/A25C).** The CID fragmentation spectrum (consisting mainly of +1H adducts) for the peptide ion of  $m/z = 1268.357$  (see Figure 8D). The peak pattern is consistent with a fusion between pre-Sufl signal peptide residues 12-24 and 25-43.

**(B) Enrichment of the Disulfide-linked Form of pre-Sufl(S12C/A25C).** The disulfide-linked form of pre-Sufl (S12C/A25C) was enriched to ~60% using thiol-reactive SulfoLink Coupling resin (see Materials and Methods). Enrichment was quantified by comparing the ion intensities for peptide B (residues 25-43 of pre-Sufl; see (A)) in the presence and absence of DTT, using a closely eluting peak for normalization. The disulfide enriched preparation yielded a substantial increase in the  $m/z = 1268.357$  peak (compare with Figures 8D and 8E).

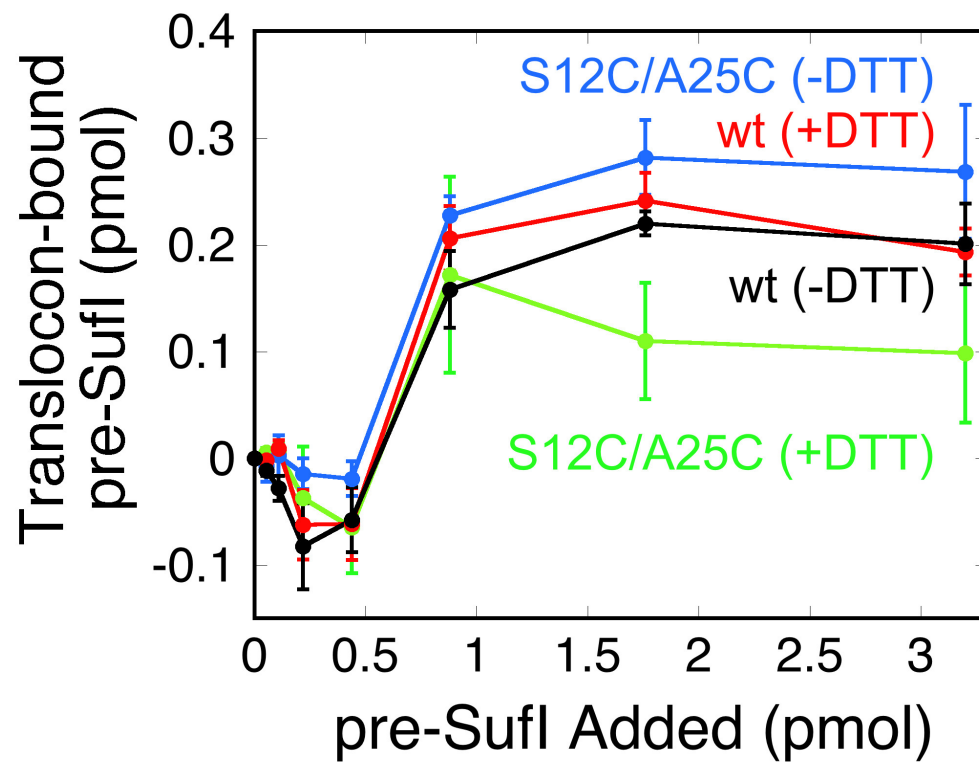

**Figure S10. Translocon-bound pre-Sufl(S12C/A25C).** As described previously (5), the translocon-bound precursor protein is dissociated upon incubation with 2 M urea. Thus, the translocon-bound precursor protein was quantified by subtracting the amount of membrane-bound pre-Sufl in 2 M urea (lipid-bound precursor; not shown) from the total membrane-bound pre-Sufl (lipid- & translocon-bound precursor; Figure 8G).



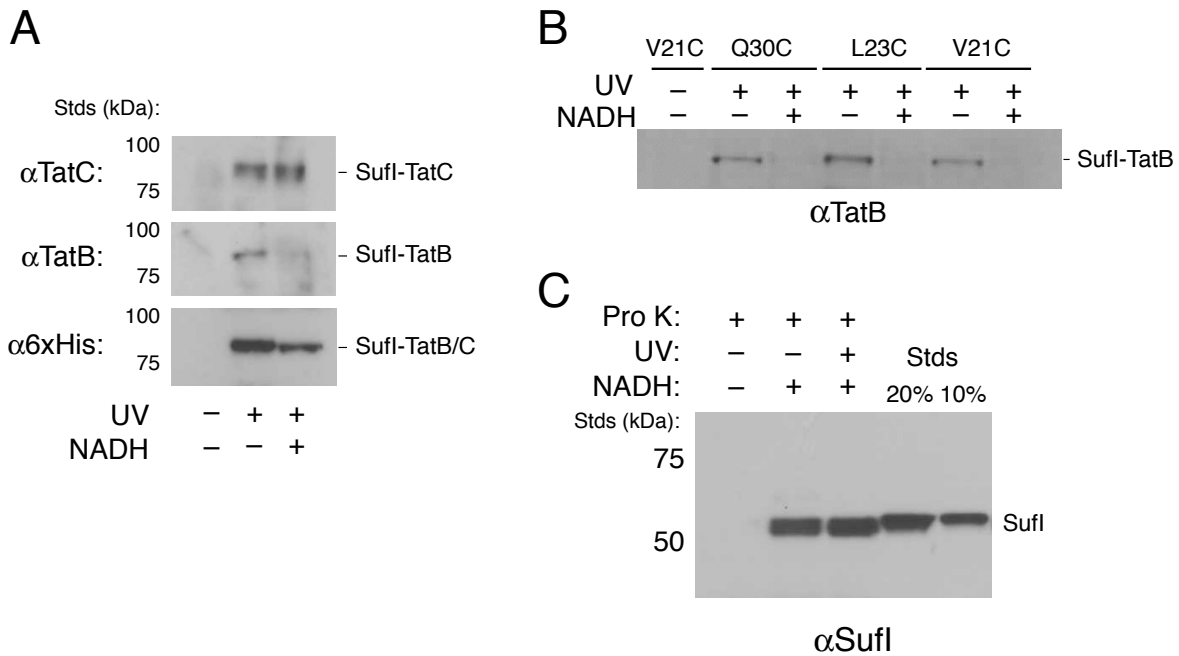

**Figure S11. Transportability of Crosslinked Precursor Proteins.** (A) Translocation of pre-Sufl(V21C) was blocked when crosslinked to TatC. After pre-Sufl(V21C) was photocrosslinked to TatC or TatB (as in Figure 7A), the IMV membranes were energized (4 mM NADH for 30 minutes at 37°C). IMVs were recovered by centrifugation (16,200 x g, 30 min), and samples were resolved via SDS-PAGE and analyzed via immunoblotting, as indicated. The pre-Sufl/TatC adduct remained after membrane energization by NADH, indicating that transport of pre-Sufl crosslinked to TatC does not occur (*top*; N = 3). In contrast, the amount of pre-Sufl/TatB adduct was substantially reduced after membrane energization by NADH, suggesting transport of Sufl (*middle*; N = 3). The anti-6xHis immunoblot, which detects Sufl-6xHis, indicates that the Sufl crosslinked to TatB and TatC was reduced by almost half (59±3% remaining) after membrane energization with NADH (*bottom*; N = 6). The pre-Sufl/TatC and pre-Sufl/TatB adducts migrate similarly and hence the bands overlap. The reduction in intensity of the Sufl-TatB/C band in the presence of NADH likely results from transport of the pre-Sufl/TatB adduct. (B) Translocation of additional pre-Sufl mutants crosslinked to TatB. The experiment in (A) was repeated with the V21C, L23C and Q30C mutants of pre-Sufl. The amount of crosslinked pre-Sufl/TatB adduct was substantially reduced in the presence of NADH, indicating proteolysis, probably by digestion of the adduct after translocation. (C) Transport was not affected by UV illumination. The Tat transport assay was described in Figure 2 – in short, the Sufl band observed in the presence of NADH (4 mM) and proteinase K (Pro K, 0.73 mg/mL) represents the transported protein. The pre-Sufl concentration standards (Stds) are a loading control in terms of percent precursor added to the reaction mixture, and indicate that ~20% of the initial precursor protein was transported.

The hairpin-hinge hypothesis (Figure 8) predicts that mature domain translocation should not occur when the C-terminal part of the signal peptide is crosslinked to the Tat translocon. The experiments in this figure tested whether signal peptide mutants crosslinked to TatB or TatC could be translocated. We assumed that transport of

crosslinked precursor protein would result in cleavage by signal peptidase, which would be observed as the disappearance of the high molecular weight crosslinked band when membranes were energized with NADH, i.e., the signal peptide would remain crosslinked to TatB or TatC (and indistinguishable from TatB or TatC alone) and the mature domain would be released. Surprisingly, the results conflicted for the V21C mutant, which crosslinks to both TatC and TatB (Figure 7A). The pre-Sufl/TatC crosslinked band was retained under transport conditions (A), indicating no transport, and consistent with the hypothesis that signal peptide residues after the hinge residue (G19) must move during transport. In contrast, the pre-Sufl/TatB crosslinked band was substantially diminished (A). This latter result was also observed when the pre-Sufl mutants L23C and Q30C were crosslinked to TatB (B). All of these results were observed consistently and repeatedly ( $N \geq 3$ ). The Q30C result is especially surprising since this mutation is after the signal peptide cleavage site (between residues 27 and 28) – signal peptidase catalyzed cleavage was expected to only remove the signal peptide from the crosslinked adduct, which would have produced only a minor gel shift (this was not observed). While puzzling, a possible scenario is that TatB is transported with the mature domain, and protease digestion can occur at multiple sites after translocation, resulting in disappearance of the crosslinked adduct. This interpretation is consistent with the Sufl immunoblot of the crosslinked protein – under transport conditions, this band get weaker, but does not disappear (A), which is the expected result if the precursor crosslinked to TatB was transported and digested, and that crosslinked to TatC was not. This picture is consistent with the recent hypothesis that TatB is replaced by TatA during transport (6) – more precisely, if the interaction of TatB with the rest of the translocation machinery is broken (required for TatB to be replaced by TatA), the TatB molecule crosslinked to the precursor protein can be transported across the membrane with the mature domain. We do NOT expect that TatB translocation is a normal step in the transport cycle.

## SUPPORTING REFERENCES

1. Stanley, N. R., K. Findlay, B. C. Berks, and T. Palmer. 2001. *Escherichia coli* strains blocked in Tat-dependent protein export exhibit pleiotropic defects in the cell envelope. *J Bacteriol* 183:139-144.
2. Urban, S., and M. Freeman. 2003. Substrate specificity of rhomboid intramembrane proteases is governed by helix-breaking residues in the substrate transmembrane domain. *Mol Cell* 11:1425-1434.
3. Berks, B. C. 1996. A common export pathway for proteins binding complex redox cofactors? *Mol Microbiol* 22:393-404.
4. Sargent, F., E. G. Bogsch, N. R. Stanley, M. Wexler, C. Robinson, B. C. Berks, and T. Palmer. 1998. Overlapping functions of components of a bacterial Sec-independent protein export pathway. *EMBO J.* 17:3640-3650.
5. Bageshwar, U. K., and S. M. Musser. 2007. Two electrical potential-dependent steps are required for transport by the *Escherichia coli* Tat machinery. *J Cell Biol* 179:87-99.
6. Alcock, F., P. J. Stansfeld, H. Basit, J. Habersetzer, M. A. Baker, T. Palmer, M. I. Wallace, and B. C. Berks. 2016. Assembling the Tat protein translocase. *Elife* 5:e20718.
